# Supplementary material for: Rapid access to the core of malayamycin A by intramolecular dipolar cycloaddition
Source: publisher site journal article supplement (doi:10.3762/bjoc.21.196), 2025-11-17

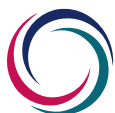

## Supporting Information

for

### **Rapid access to the core of malayamycin A by intramolecular dipolar cycloaddition**

Yilin Liu, Yuchen Yang, Chen Yang, Sha-Hua Huang, Jian Jin and Ran Hong

*Beilstein J. Org. Chem.* **2025**, 21, 2542–2547. doi:10.3762/bjoc.21.196

### **Experimental procedures and compound characterization data**

## *Contents*

|                                                                  |     |
|------------------------------------------------------------------|-----|
| 1. General procedures.....                                       | S2  |
| 2. Experimental procedures.....                                  | S3  |
| 3. X-ray data for compound <b>19a</b> .....                      | S12 |
| 4. $^1\text{H}$ NMR, $^{13}\text{C}$ NMR and 2D NMR spectra..... | S13 |

## 1. General procedures

All reactions sensitive to air or moisture were conducted in oven-dried glassware fitted with rubber septa and magnetically stirred under argon atmosphere unless otherwise noted. All commercial grade reagents were used without further purification unless stated otherwise. Flash chromatography was carried out with 200-300 mesh silica gel (Silicycle® flash F60) with the indicated solvent systems.

Reactions were monitored by thin layer chromatography (TLC) supplied by Yantai Jiangyou Silicon Material Company (China). Visualization was accomplished with UV light or basic aqueous potassium permanganate (KMnO<sub>4</sub>). NMR spectra were recorded on Varian mercury-400, Bruker AM-400, and Bruker AV-600 spectrometers and chemical shifts are reported in ppm using residual <sup>1</sup>H and <sup>13</sup>C signals of the solvent (CDCl<sub>3</sub>: δ 7.26, 77.06 ppm; CD<sub>3</sub>OD: δ 3.31, 49.00 ppm) as an internal standard. NMR experiments were all performed at 298 K. Signal patterns are indicated as: (s = singlet, br = broaden peak, d = doublet, t = triplet, q = quartet, m = multiplet). Structural assignments were made with additional information from gHMQC, gCOSY, gNOESY, and gHMBC experiments. Mass spectra were determined on a Shimadzu LCMS-2010EV(ESI) mass spectrometer or Agilent G6100 LC/MSD (ESI) single Quand mass spectrometer. High-resolution mass spectra (HRMS) were acquired through the National Center for Organic Mass Spectrometry in Shanghai on a Thermo Fisher Scientific LTQFT-Ultra mass spectrometer (mass analyzer type: Fourier transform ion cyclotron resonance (FT-ICR) with ESI (Electron Spray Ionization). Infrared (IR) spectra were recorded as thin films on KBr plates on a Perkin–Elmer 983 or Digital FTIR spectrometer and are reported in frequencies of absorption given in reciprocal centimeters (cm<sup>-1</sup>).

## 2. Experimental procedure

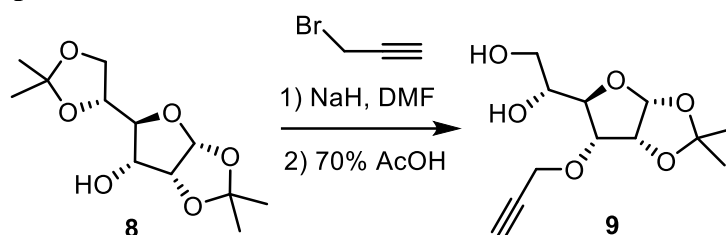

To a solution of **8** (2.6 g, 10 mmol) in DMF (25 mL) was added sodium hydride (480 mg, 12 mmol, 60% in mineral oil) at 0°C under nitrogen atmosphere. After stirring during 30 min, propargyl bromide (1.03 mL, 12 mmol) was added. The reaction was stirred at room temperature overnight. The reaction was then quenched with aqueous NH<sub>4</sub>Cl and extracted with EA (3×50 mL). The combined organic layers were washed with brine (50 mL) and dried over Na<sub>2</sub>SO<sub>4</sub>, filtered and concentrated *in vacuo*. The residue was subjected to purification by flash column chromatography on silica gel (hexanes/EtOAc = 12/1) to give product as white solid (2.7 g, 90% yield). The obtained solid was dissolved in 70% AcOH (21 mL), and the reaction mixture was stirred at room temperature overnight, and concentrated under reduced pressure to obtain the crude product. The residue was subjected to purification by flash column chromatography on silica gel (DCM/ acetone = 5/1) to give **9**<sup>1</sup> as yellow oil (1.0 g, 77% yield, brsm 92%).

$[\alpha]_{\text{D}}^{25} = +96.5$  ( $c = 0.5$  in CHCl<sub>3</sub>);

<sup>1</sup>H NMR (400 MHz, CDCl<sub>3</sub>)  $\delta$  5.79 (d,  $J = 3.5$  Hz, 1H), 4.70 (t,  $J = 4.1$  Hz, 1H), 4.39 (dd,  $J = 16.1, 2.2$  Hz, 1H), 4.25 (dd,  $J = 16.1, 2.1$  Hz, 1H), 4.18 (dd,  $J = 8.5, 4.1$  Hz, 1H), 4.09–4.00 (m, 2H), 3.78–3.66 (m, 2H), 2.55 (t,  $J = 2.4$  Hz, 1H), 1.57 (s, 3H), 1.35 (s, 3H).

HRMS-ESI ( $m/z$ ): calcd. for C<sub>12</sub>H<sub>18</sub>NaO<sub>6</sub> [M+Na]<sup>+</sup>: 281.0996; found: 281.0998

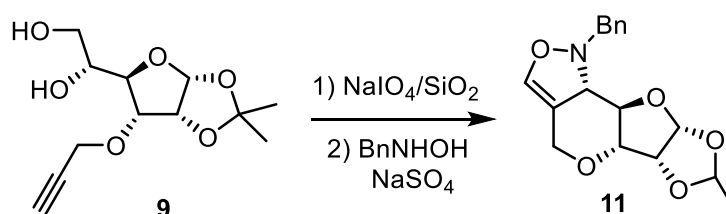

To a solution of **9** (140 mg, 0.54 mmol) in DCM (3 mL) was added NaIO<sub>4</sub>/SiO<sub>2</sub> (20 %, 800 mg). The reaction mixture was stirred at room temperature for 30 min. The mixture was

<sup>1</sup> Jana, S. *Indian J. Chem. B.* **2007**, 45B, 1648-1657.

filtered through a short plug of silica gel, washed with EtOAc (20 mL) and concentrated *in vacuo*. The crude reaction mixture was dissolved in toluene (5 mL), and then Na<sub>2</sub>SO<sub>4</sub> (769 mg, 5.4 mmol) and BnNHOH (80 mg, 0.64 mmol) were added to the system. The reaction was stirred at room temperature until TLC showed complete consumption of the starting material. The mixture was filtered through a short plug of silica gel, washed with EtOAc (20 mL) and concentrated *in vacuo*. The residue was subjected to purification by flash column chromatography on silica gel (hexanes/EtOAc = 2/1) to give **11** as white solid (75 mg, 42% yield).

**Mp** 116–118 °C;

$[\alpha]_D^{25} = -285.0$  ( $c = 1.0$  in CH<sub>2</sub>Cl<sub>2</sub>);

**<sup>1</sup>H NMR** (600 MHz, CDCl<sub>3</sub>):  $\delta$  7.42 (d,  $J = 7.3$  Hz, 2H), 7.34 (t,  $J = 7.5$  Hz, 2H), 7.29 (d,  $J = 7.3$  Hz, 1H), 6.40 (s, 1H), 5.76 (d,  $J = 3.5$  Hz, 1H), 4.66 (t,  $J = 3.8$  Hz, 1H), 4.59 (d,  $J = 12.6$  Hz, 1H), 4.28–4.15 (m, 2H), 4.12 (d,  $J = 8.9$  Hz, 1H), 4.06 (dt,  $J = 12.5, 1.4$  Hz, 1H), 3.96 (t,  $J = 9.0$  Hz, 1H), 3.11 (dd,  $J = 9.4, 4.1$  Hz, 1H), 1.61 (s, 3H), 1.35 (s, 3H).

**<sup>13</sup>C NMR** (151MHz, CDCl<sub>3</sub>):  $\delta$  139.5, 136.4, 129.2, 128.5, 127.7, 113.9, 104.5, 104.4, 79.9, 76.4, 74.0, 64.3, 64.1, 26.4, 26.3

**FT-IR:**  $\nu$  (cm<sup>-1</sup>): 2984, 2928, 2847, 1674, 1454, 1377, 1251, 1213, 1113, 1081, 1006, 862, 706, 637, 523.

**HRMS-ESI** ( $m/z$ ): calcd. for C<sub>18</sub>H<sub>22</sub>NO<sub>5</sub> [M+H]<sup>+</sup>: 332.1492; found: 332.1486

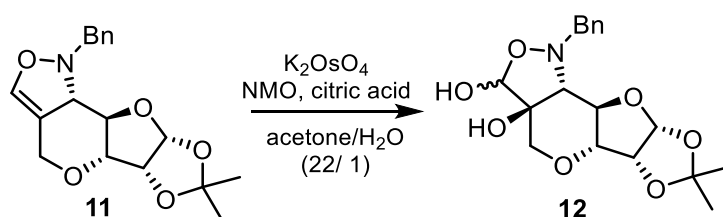

To a solution of **11** (600 mg, 1.8 mmol) in acetone/H<sub>2</sub>O (9.4 mL, v/v 22:1) was added 4-Methylmorpholine *N*-oxide (421 mg, 3.6 mmol) and K<sub>2</sub>OsO<sub>4</sub>•2H<sub>2</sub>O (7.0 mg, 0.018 mmol). The reaction mixture was stirred at room temperature for 17 h. The reaction was then quenched with aqueous Na<sub>2</sub>SO<sub>3</sub>. The mixture was filtered through a short plug of silica gel, washed with EtOAc (50 mL) and concentrated *in vacuo*. The residue was subjected to

purification by flash column chromatography on silica gel (hexanes/EtOAc = 1/2) to give **12** as white solid (381 mg, 75% yield).

**Mp** 53–56 °C;

$[\alpha]_{\text{D}}^{25} = +39.6$  ( $c = 0.8$  in  $\text{CHCl}_3$ );

**$^1\text{H}$  NMR** (400 MHz,  $\text{CDCl}_3$ )  $\delta$  7.42 (d,  $J = 7.4$  Hz, 2H), 7.34–7.22 (m, 3H), 5.83 (d,  $J = 3.5$  Hz, 1H), 5.27 (s, 1H), 4.65 (t,  $J = 3.8$  Hz, 1H), 4.19 (s, 2H), 4.00 (d,  $J = 12.1$  Hz, 1H), 3.66 (d,  $J = 11.9$  Hz, 2H), 3.35 (d,  $J = 9.2$  Hz, 2H), 1.62 (s, 3H), 1.37 (s, 3H).

**$^{13}\text{C}$  NMR** (101 MHz,  $\text{CDCl}_3$ )  $\delta$  136.8, 129.6, 129.3, 128.5, 128.4, 127.8, 127.6, 114.1, 105.8, 75.9, 73.1, 71.6, 26.5, 26.3, 14.3

**FT-IR:**  $\nu$  ( $\text{cm}^{-1}$ ): 3402, 1375, 1215, 1145, 1031, 962, 860, 744, 731, 621, 468, 408.

**HRMS-ESI** ( $m/z$ ): calcd. for  $\text{C}_{18}\text{H}_{24}\text{NO}_7$   $[\text{M}+\text{H}]^+$ : 366.1547; found: 366.1547

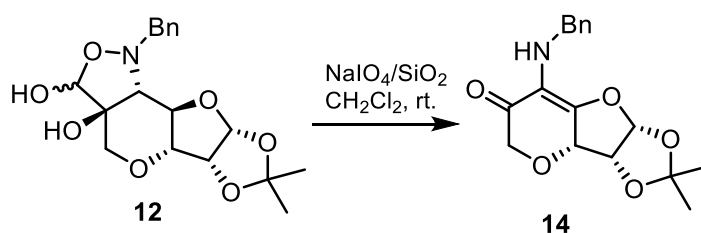

To a solution of **12** (10 mg, 0.027 mmol) in DCM (0.5 mL) was added  $\text{NaIO}_4/\text{SiO}_2$  (20 %, 25 mg). The reaction mixture was stirred at room temperature for 20 min. The mixture was filtered through a short plug of silica gel, washed with EtOAc (20 mL) and concentrated *in vacuo*. The residue was subjected to purification by flash column chromatography on silica gel (hexanes/EtOAc = 1/1) to give **14** as white solid (6.0 mg, 60% yield).

**Mp** 140–142 °C;

$[\alpha]_{\text{D}}^{25} = -373.2$  ( $c = 0.2$  in  $\text{CHCl}_3$ );

**$^1\text{H}$  NMR** (500 MHz,  $\text{CDCl}_3$ ):  $\delta$  7.33–7.27 (m, 4H), 7.25–7.19 (m, 1H), 6.18–6.15 (m, 1H), 4.83–4.80 (m, 1H), 4.78–4.74 (m, 1H), 4.46–4.38 (m, 2H), 4.29 (d,  $J = 14.4$  Hz, 1H), 4.23–4.14 (m, 1H), 4.04 (s, 1H), 1.45 (s, 3H), 1.44 (s, 3H).

**$^{13}\text{C}$  NMR** (126 MHz,  $\text{CDCl}_3$ ):  $\delta$  190.4, 150.3, 140.3, 128.6, 127.4, 127.2, 120.5, 116.9, 108.3, 79, 76.6, 71.7, 49.2, 27.8, 27.0

**FT-IR:**  $\nu$  ( $\text{cm}^{-1}$ ): 2987, 2841, 1693, 1627, 1475, 1375, 1205, 1118, 1035, 819, 783, 532.

**HRMS-ESI** ( $m/z$ ): calcd. for  $C_{17}H_{20}NO_5$   $[M+H]^+$ : 318.1336; found: 318.1335

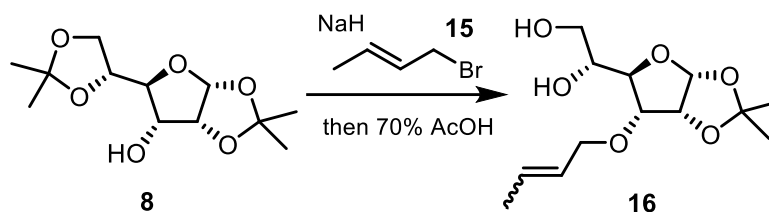

To a solution of **8** (3.9 g, 15 mmol) in DMF (30 mL) was added sodium hydride (720 mg, 18 mmol, 60% in mineral oil) at 0 °C under nitrogen atmosphere. After stirring during 10 min, crotyl bromide **15** (*E/Z* 5/1, 1.9 mL, 15.75 mmol) was added. The reaction was stirred at room temperature for additional 4.5 h. The reaction was then quenched with aqueous  $NH_4Cl$  and extracted with EA (3×50 mL). The combined organic layers were washed with brine (50 mL) and dried over  $Na_2SO_4$ , filtered and concentrated *in vacuo*. The residue was subjected to purification by flash column chromatography on silica gel (hexanes/EtOAc = 15/1) to give product as white solid (3.6 g, 78% yield). The obtained solid was dissolved in 70% AcOH (38 mL), and the reaction mixture was stirred at room temperature overnight, and concentrated under reduced pressure to obtain the crude product. The residue was subjected to purification by flash column chromatography on silica gel (hexanes/EtOAc = 1/1) to give **16**<sup>2</sup> as yellow oil (*E/Z* isomers, 3.3 g, 99% yield).

$[\alpha]_D^{25} = +110.2$  ( $c = 1.0$  in  $CHCl_3$ );

**$^1H$  NMR** (400 MHz,  $CDCl_3$ )  $\delta$  5.83–5.65 (m, 2H), 5.65–5.53 (m, 1H), 4.62 (dt,  $J = 11.7, 4.0$  Hz, 1H), 4.28 (dd,  $J = 11.3, 6.0$  Hz, 0.3H), 4.20–4.08 (m, 1H), 4.06–3.93 (m, 2.8H), 3.92–3.85 (m, 1H), 3.72–3.60 (m, 2H), 2.87 (s, 1H), 2.81 (s, 1H), 1.69 (ddd,  $J = 13.3, 6.7, 1.6$  Hz, 3H), 1.55 (s, 3H), 1.33 (s, 3H).

**HRMS-ESI** ( $m/z$ ): calcd. For  $C_{13}H_{22}NaO_6$   $[M+Na]^+$ : 297.1309; found: 297.1302

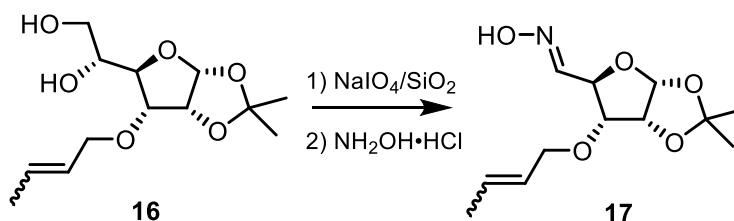

<sup>2</sup> Chatterjee, A.; Bhattacharya, P. K. *J. Org. Chem.* **2006**, *71*, 345-348.

To a solution of **16** (3.2 g, 11.6 mmol) in DCM (23 mL) was added NaIO<sub>4</sub>/SiO<sub>2</sub> (20 %, 30 g). The reaction mixture was stirred at room temperature for 45 min. The mixture was filtered through a short plug of silica gel, washed with EtOAc (50 mL) and concentrated *in vacuo*. The crude reaction mixture was dissolved in ethanol (39 mL), and then NaHCO<sub>3</sub> (2.3 g, 39 mmol) and NH<sub>2</sub>OH•HCl (2.2 g, 32.5 mmol) were added to the system. The reaction was stirred at 45 °C for 20 min. The mixture was filtered through a short plug of silica gel, washed with EtOAc (50 mL) and concentrated *in vacuo*. The residue was subjected to purification by flash column chromatography on silica gel (hexanes/EtOAc = 3/1) to give **17** as white solid (*E/Z* isomers, 2.29 g, 77% yield).

**Mp** 64–66 °C;

$[\alpha]_{\text{D}}^{25} = +40.3$  ( $c = 1.0$  in CHCl<sub>3</sub>);

**<sup>1</sup>H NMR** (400 MHz, CDCl<sub>3</sub>)  $\delta$  7.80 (s, 1H), 7.39 (t,  $J = 6.4$  Hz, 1H), 5.82 – 5.65 (m, 2H), 5.62–5.51 (m, 1H), 4.68–4.60 (m, 1H), 4.59–4.52 (m, 1H), 4.29–3.99 (m, 2H), 3.76 (dt,  $J = 8.7, 4.3$  Hz, 1H), 1.75–1.65 (m, 3H), 1.59 (s, 3H), 1.36 (s, 3H).

**<sup>13</sup>C NMR** (101 MHz, CDCl<sub>3</sub>):  $\delta$  148.9, 131.0, 127.3, 114.1, 104.2, 80.1, 77.9, 75.9, 71.7, 26.9 (2 carbons), 17.9

**FT-IR:**  $\nu$  (cm<sup>-1</sup>): 3435, 2983, 1377, 1251, 1213, 1166, 1114, 1082, 1066, 1018, 1001, 974, 970, 869, 651, 522.

**HRMS-ESI** ( $m/z$ ): calcd. For C<sub>12</sub>H<sub>19</sub>NNaO<sub>5</sub> [M+Na]<sup>+</sup>: 280.1155; found: 280.1159

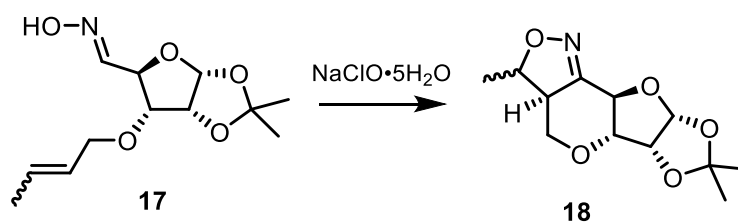

To a solution of **17** (280 mg, 1.09 mmol) in DCM (55 mL) was added NaOCl•5H<sub>2</sub>O (360 mg, 2.18 mmol). The reaction mixture was stirred at room temperature overnight. The reaction was then quenched with anhydrous Na<sub>2</sub>S<sub>2</sub>O<sub>3</sub> and extracted with EA (3×50 mL). The combined organic layers were washed with brine (50 mL) and dried over Na<sub>2</sub>SO<sub>4</sub>, filtered and concentrated *in vacuo*. The residue was subjected to purification by flash column

chromatography on silica gel (hexanes/EtOAc = 1/1) to give **18** as white solid ( $\alpha/\beta$ -methyl isomers, 220 mg, 79% yield,  $dr = 4:1$ ).

**Mp** 197–201 °C;

$[\alpha]_D^{25} = -213.4$  ( $c = 1.0$  in  $\text{CHCl}_3$ );

**$^1\text{H}$  NMR** (400 MHz,  $\text{CDCl}_3$ ):  $\delta$  5.87–5.84 (m, 1H), 4.83–4.73 (m, 0.26H), 4.73–4.68 (m, 1.26H), 4.50 (d,  $J = 9.8$  Hz, 0.25H), 4.45 (d,  $J = 9.7$  Hz, 1H), 4.34 (dd,  $J = 10.9, 7.3$  Hz, 1H), 4.25–4.15 (m, 1.25H), 3.65 (t,  $J = 11.1$  Hz, 0.25H), 3.45 (t,  $J = 10.7$  Hz, 1H), 3.43–3.34 (m, 0.25H), 3.17 (dd,  $J = 9.8, 3.9$  Hz, 1H), 3.13 (dd, 0.25H), 3.02 (td,  $J = 10.0, 7.6$  Hz, 1H), 1.54 (s, 3.8H), 1.39 (d,  $J = 6.2$  Hz, 3H), 1.31 (s, 3.8H), 1.17 (d,  $J = 6.7$  Hz, 0.8H).

**$^{13}\text{C}$  NMR** (101 MHz,  $\text{CDCl}_3$ ):  $\delta$  156.1, 155.1, 114.2, 105.7, 105.6, 83.3, 83.3, 79.0, 77.4, 76.3, 76.0, 75.9, 73.4, 71.5, 71.4, 69.6, 53.8, 49.4, 26.2, 26.0, 19.6, 15.4

**FT-IR**:  $\nu$  ( $\text{cm}^{-1}$ ): 2983, 2879, 1377, 1251, 1211, 1112, 1001, 931, 862, 846, 406.

**HRMS-ESI** ( $m/z$ ): calcd. for  $\text{C}_{12}\text{H}_{18}\text{NO}_5$   $[\text{M}+\text{Na}]^+$ : 256.1179; found: 256.1189

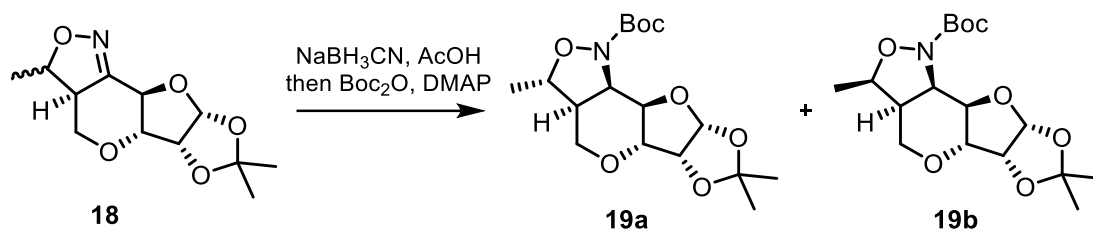

To a solution of **18** (255 mg, 1 mmol,  $dr = 4:1$ ) in DCM (10 mL) and AcOH (10 mL) was added  $\text{NaBH}_3\text{CN}$  (252 mg, 4 mmol). The reaction mixture was stirred at room temperature for 2 h. TLC analysis indicated incomplete conversion of the starting material. The reaction was quenched with dropwise addition of NaOH solution to adjust the pH to 7, and extracted with EA (3×30 mL). The combined organic layers were washed with brine (50 mL) and dried over  $\text{Na}_2\text{SO}_4$ , filtered and concentrated *in vacuo*. The residue was subjected to purification by flash column chromatography on silica gel (hexanes/EtOAc = 1/1) to give product as yellow oil, which was used directly in the next step without further purification. To a solution of obtained crude oil (250 mg, 0.9 mmol) in DCM (3 mL) was added  $\text{Boc}_2\text{O}$  (1.5 mL, 6.5 mmol) and DMAP (22 mg, 0.09 mmol). The reaction mixture was stirred at room temperature for 3h. The reaction mixture was subjected to purification by flash

chromatography on silica gel (hexanes/EtOAc = 3/1) to afford **19a** and **19b** (207 mg, total 58% yield, *dr* = 4:1) as white solid.

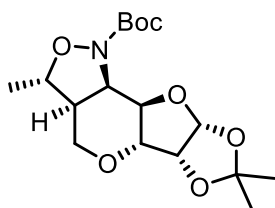

**19a (major):**

**Mp** 198–201 °C;

$[\alpha]_{\text{D}}^{25} = -185.2$  ( $c = 0.5$  in  $\text{CHCl}_3$ );

**$^1\text{H}$  NMR** (600 MHz,  $\text{CDCl}_3$ ):  $\delta$  5.81 (d,  $J = 3.4$  Hz, 1H), 4.70 (dd,  $J = 6.1, 4.2$  Hz, 1H), 4.61 (t,  $J = 3.9$  Hz, 1H), 4.20 (dd,  $J = 11.7, 7.0$  Hz, 1H), 4.10 (dd,  $J = 9.9, 4.0$  Hz, 1H), 3.93 (q,  $J = 6.4$  Hz, 1H), 3.58 (dd,  $J = 11.7, 9.8$  Hz, 1H), 3.46 (dd,  $J = 9.9, 4.4$  Hz, 1H), 2.69 (dt,  $J = 9.7, 6.7$  Hz, 1H), 1.57 (s, 3H), 1.50 (s, 9H), 1.34 (s, 3H), 1.16 (d,  $J = 6.4$  Hz, 3H).

**$^{13}\text{C}$  NMR** (151 MHz,  $\text{CDCl}_3$ ):  $\delta$  159.2, 113.4, 105.0, 82.4, 78.9, 76.5, 74.6, 73.4, 69.6, 57.8, 47.1, 28.3, 26.5, 26.2, 17.2

**FT-IR:**  $\nu$  ( $\text{cm}^{-1}$ ): 2983, 2879, 1377, 1211, 1112, 1068, 1003, 863, 838, 509.

**HRMS-ESI** ( $m/z$ ): calcd. for  $\text{C}_{17}\text{H}_{27}\text{NNaO}_7$   $[\text{M}+\text{Na}]^+$ : 380.1680; found: 380.1682

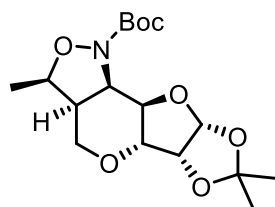

**19b (minor):**

**Mp** 80–82 °C;

$[\alpha]_{\text{D}}^{25} = +73.6$  ( $c = 0.1$  in  $\text{CHCl}_3$ );

**$^1\text{H}$  NMR** (600 MHz,  $\text{CDCl}_3$ )  $\delta$  5.81 (d,  $J = 3.4$  Hz, 1H), 4.72 (dd,  $J = 6.6, 4.1$  Hz, 1H), 4.60 (t,  $J = 3.9$  Hz, 1H), 4.17 (dd,  $J = 10.1, 4.1$  Hz, 1H), 4.11–4.01 (m, 2H), 3.83 (dd,  $J = 12.0, 8.3$  Hz, 1H), 3.53 (dd,  $J = 10.1, 4.3$  Hz, 1H), 2.79–2.72 (m, 1H), 1.59 (s, 3H), 1.50 (s, 9H), 1.35 (s, 3H), 1.30 (d,  $J = 6.4$  Hz, 3H).

**$^{13}\text{C}$  NMR** (151 MHz,  $\text{CDCl}_3$ ):  $\delta$  158.4, 113.3, 105.0, 82.6, 77.8, 76.7, 74.4, 73.1, 65.5, 44.3, 28.3, 26.5, 26.1, 12.2

**FT-IR:**  $\nu$  ( $\text{cm}^{-1}$ ): 3354, 2980, 2920, 2864, 1720, 1664, 1367, 1255, 1244, 1159, 1085, 1045,

1008, 856, 435.

**HRMS-ESI** ( $m/z$ ): calcd. For  $C_{17}H_{27}NNaO_7$   $[M+Na]^+$ : 380.1680; found: 380.1689

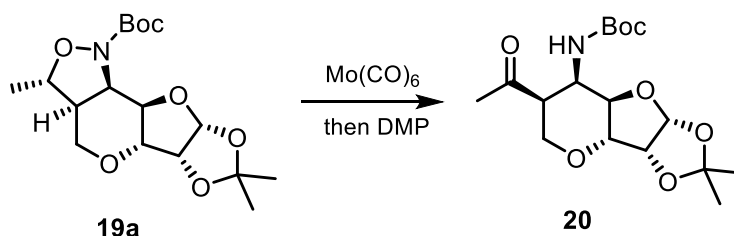

To a solution of **19a** (67 mg, 0.18 mmol) in  $CH_3CN$  (14.4 mL) and  $H_2O$  (3.6 mL) was added  $Mo(CO)_6$  (238 mg, 0.9 mmol). The reaction mixture was stirred at 135 °C for 2.5 h. The reaction mixture was cooled to room temperature, filtered through a short plug of silica gel and concentrated *in vacuo*. The crude was used directly in the next step without further purification. To a solution of crude (45 mg, 0.12 mmol) in DCM (5 mL) was added DMP (80 mg, 0.19 mmol). The reaction mixture was stirred at room temperature until TLC analysis indicated complete conversion of the starting material. The reaction mixture was added aqueous  $NaHCO_3$  to adjust the pH to 7 and then quenched with aqueous  $Na_2S_2O_3$ , extracted with EA (3×20 mL). The combined organic layers were washed with brine (20 mL) and dried over  $Na_2SO_4$ , filtered and concentrated *in vacuo*. The residue was subjected to purification by flash column chromatography on silica gel (hexanes/EtOAc = 5/1) to give **20** as white solid (32 mg, 50% yield).

**Mp** 180–184 °C;

$[\alpha]_D^{25} = -40.0$  ( $c = 0.7$  in  $CHCl_3$ );

**$^1H$  NMR** (400 MHz,  $CDCl_3$ ):  $\delta$  5.80 (d,  $J = 3.4$  Hz, 1H), 5.04–4.91 (m, 1H), 4.72–4.61 (m, 2H), 4.04 (dd,  $J = 12.8, 4.7$  Hz, 1H), 3.98 (dd,  $J = 10.1, 4.0$  Hz, 1H), 3.81 (t,  $J = 12.3$  Hz, 1H), 3.23 (dd,  $J = 10.0, 3.9$  Hz, 1H), 2.97 (dt,  $J = 11.7, 4.2$  Hz, 1H), 2.27 (s, 3H), 1.59 (s, 3H), 1.41 (s, 9H), 1.35 (s, 3H).

**$^{13}C$  NMR** (101 MHz,  $CDCl_3$ ):  $\delta$  155.6, 114.0, 105.0, 80.6, 77.4, 76.3, 75.6, 73.1, 66.0, 51.3, 48.4, 29.2, 28.3, 26.4, 26.2

**FT-IR:**  $\nu$  ( $cm^{-1}$ ): 3398, 2970, 1510, 1365, 1244, 1155, 1014, 983, 960, 852.

**HRMS-ESI** ( $m/z$ ): calcd. For  $C_{17}H_{27}NNaO_7$   $[M+Na]^+$ : 380.1680; found: 380.1687

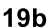

20

### 3. X-ray structure of 19a (CCDC 2483598)

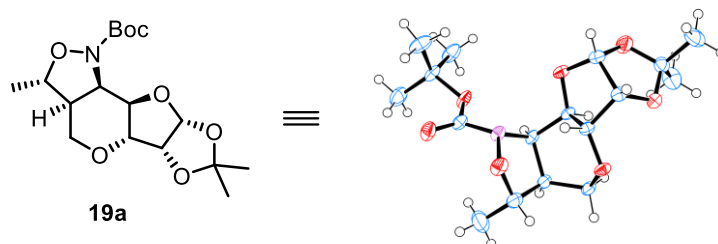

|                                   |                                                 |          |
|-----------------------------------|-------------------------------------------------|----------|
| Identification code               | mj25319_0m                                      |          |
| Empirical formula                 | C <sub>17</sub> H <sub>27</sub> NO <sub>7</sub> |          |
| Formula weight                    | 357.39 g/mol                                    |          |
| Temperature                       | 170.00 K                                        |          |
| Wavelength                        | Ga K $\alpha$ ( $\lambda$ = 1.34139 Å)          |          |
| Crystal system                    | Orthorhombic                                    |          |
| Space group                       | P212121                                         |          |
| Unit cell dimensions              | a = 8.97210(10) Å                               | a = 90°. |
|                                   | b = 11.7715(2) Å                                | b = 90°. |
|                                   | c = 17.2522(2) Å                                | c = 90°. |
| Volume                            | 1822.09(4) Å <sup>3</sup>                       |          |
| Z                                 | 4                                               |          |
| Density (calculated)              | 1.303 Mg/m <sup>3</sup>                         |          |
| Absorption coefficient            | 0.559 mm <sup>-1</sup>                          |          |
| F(000)                            | 768                                             |          |
| Crystal size                      | 0.17 x 0.17 x 0.05 mm <sup>3</sup>              |          |
| Theta range for data collection   | 4.459 to 63.446°.                               |          |
| Index ranges                      | -11 ≤ h ≤ 11, -15 ≤ k ≤ 15, -22 ≤ l ≤ 23        |          |
| Reflections collected             | 20917                                           |          |
| Independent reflections           | 4494 [R(int) = 0.0359]                          |          |
| Completeness to theta = 53.594°   | 99.3 %                                          |          |
| Absorption correction             | Semi-empirical from equivalents                 |          |
| Max. and min. transmission        | 0.7523 and 0.5836                               |          |
| Refinement method                 | Full-matrix least-squares on F <sup>2</sup>     |          |
| Data / restraints / parameters    | 4494 / 0 / 232                                  |          |
| Goodness-of-fit on F <sup>2</sup> | 1.039                                           |          |
| Final R indices [I > 2σ(I)]       | R1 = 0.0302, wR2 = 0.0813                       |          |
| R indices (all data)              | R1 = 0.0306, wR2 = 0.0816                       |          |
| Absolute structure parameter      | 0.03(4)                                         |          |
| Extinction coefficient            | n/a                                             |          |
| Largest diff. peak and hole       | 0.265 and -0.144 e.Å <sup>-3</sup>              |          |

#### **4. $^1\text{H}$ NMR, $^{13}\text{C}$ NMR and 2D-NMR spectra**

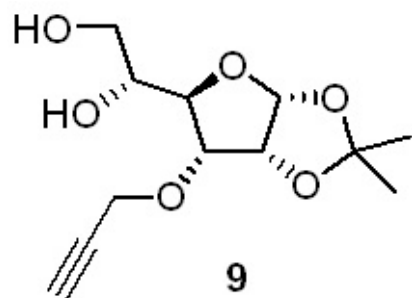

$^1\text{H}$  NMR spectrum  
(400 MHz,  $\text{CDCl}_3$ )

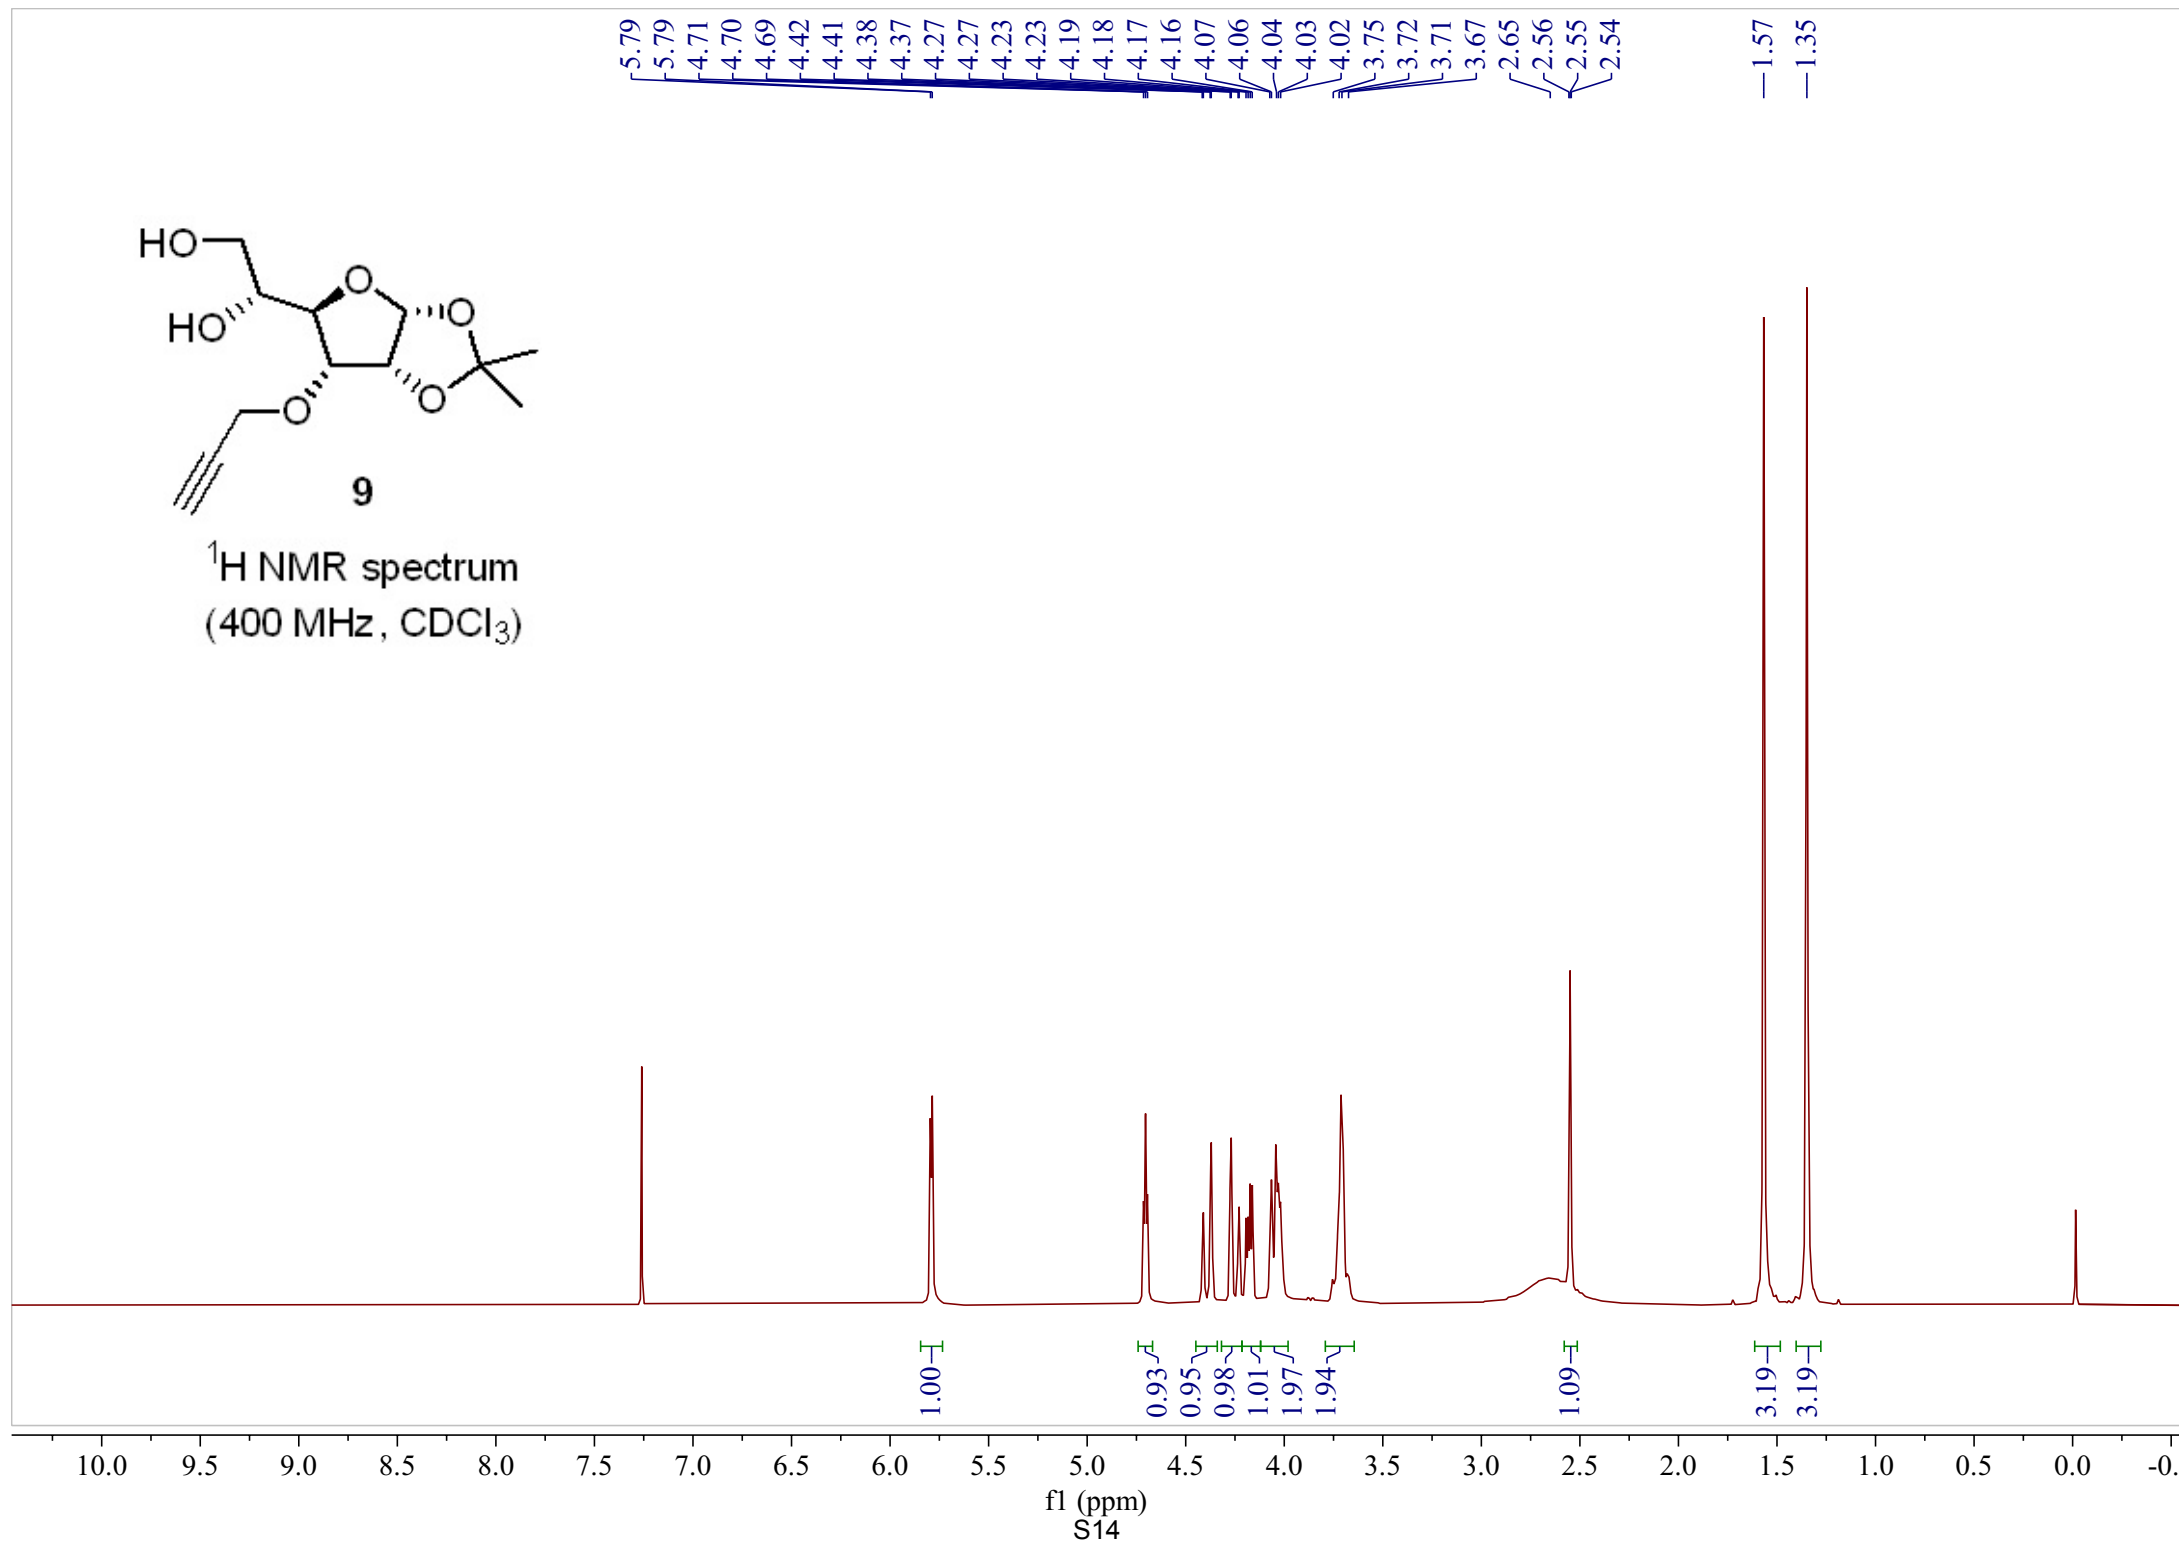

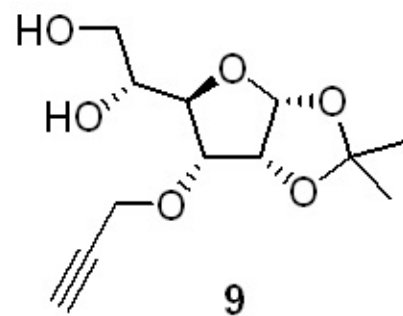

$^{13}\text{C}$  NMR spectrum  
(101 MHz,  $\text{CDCl}_3$ )

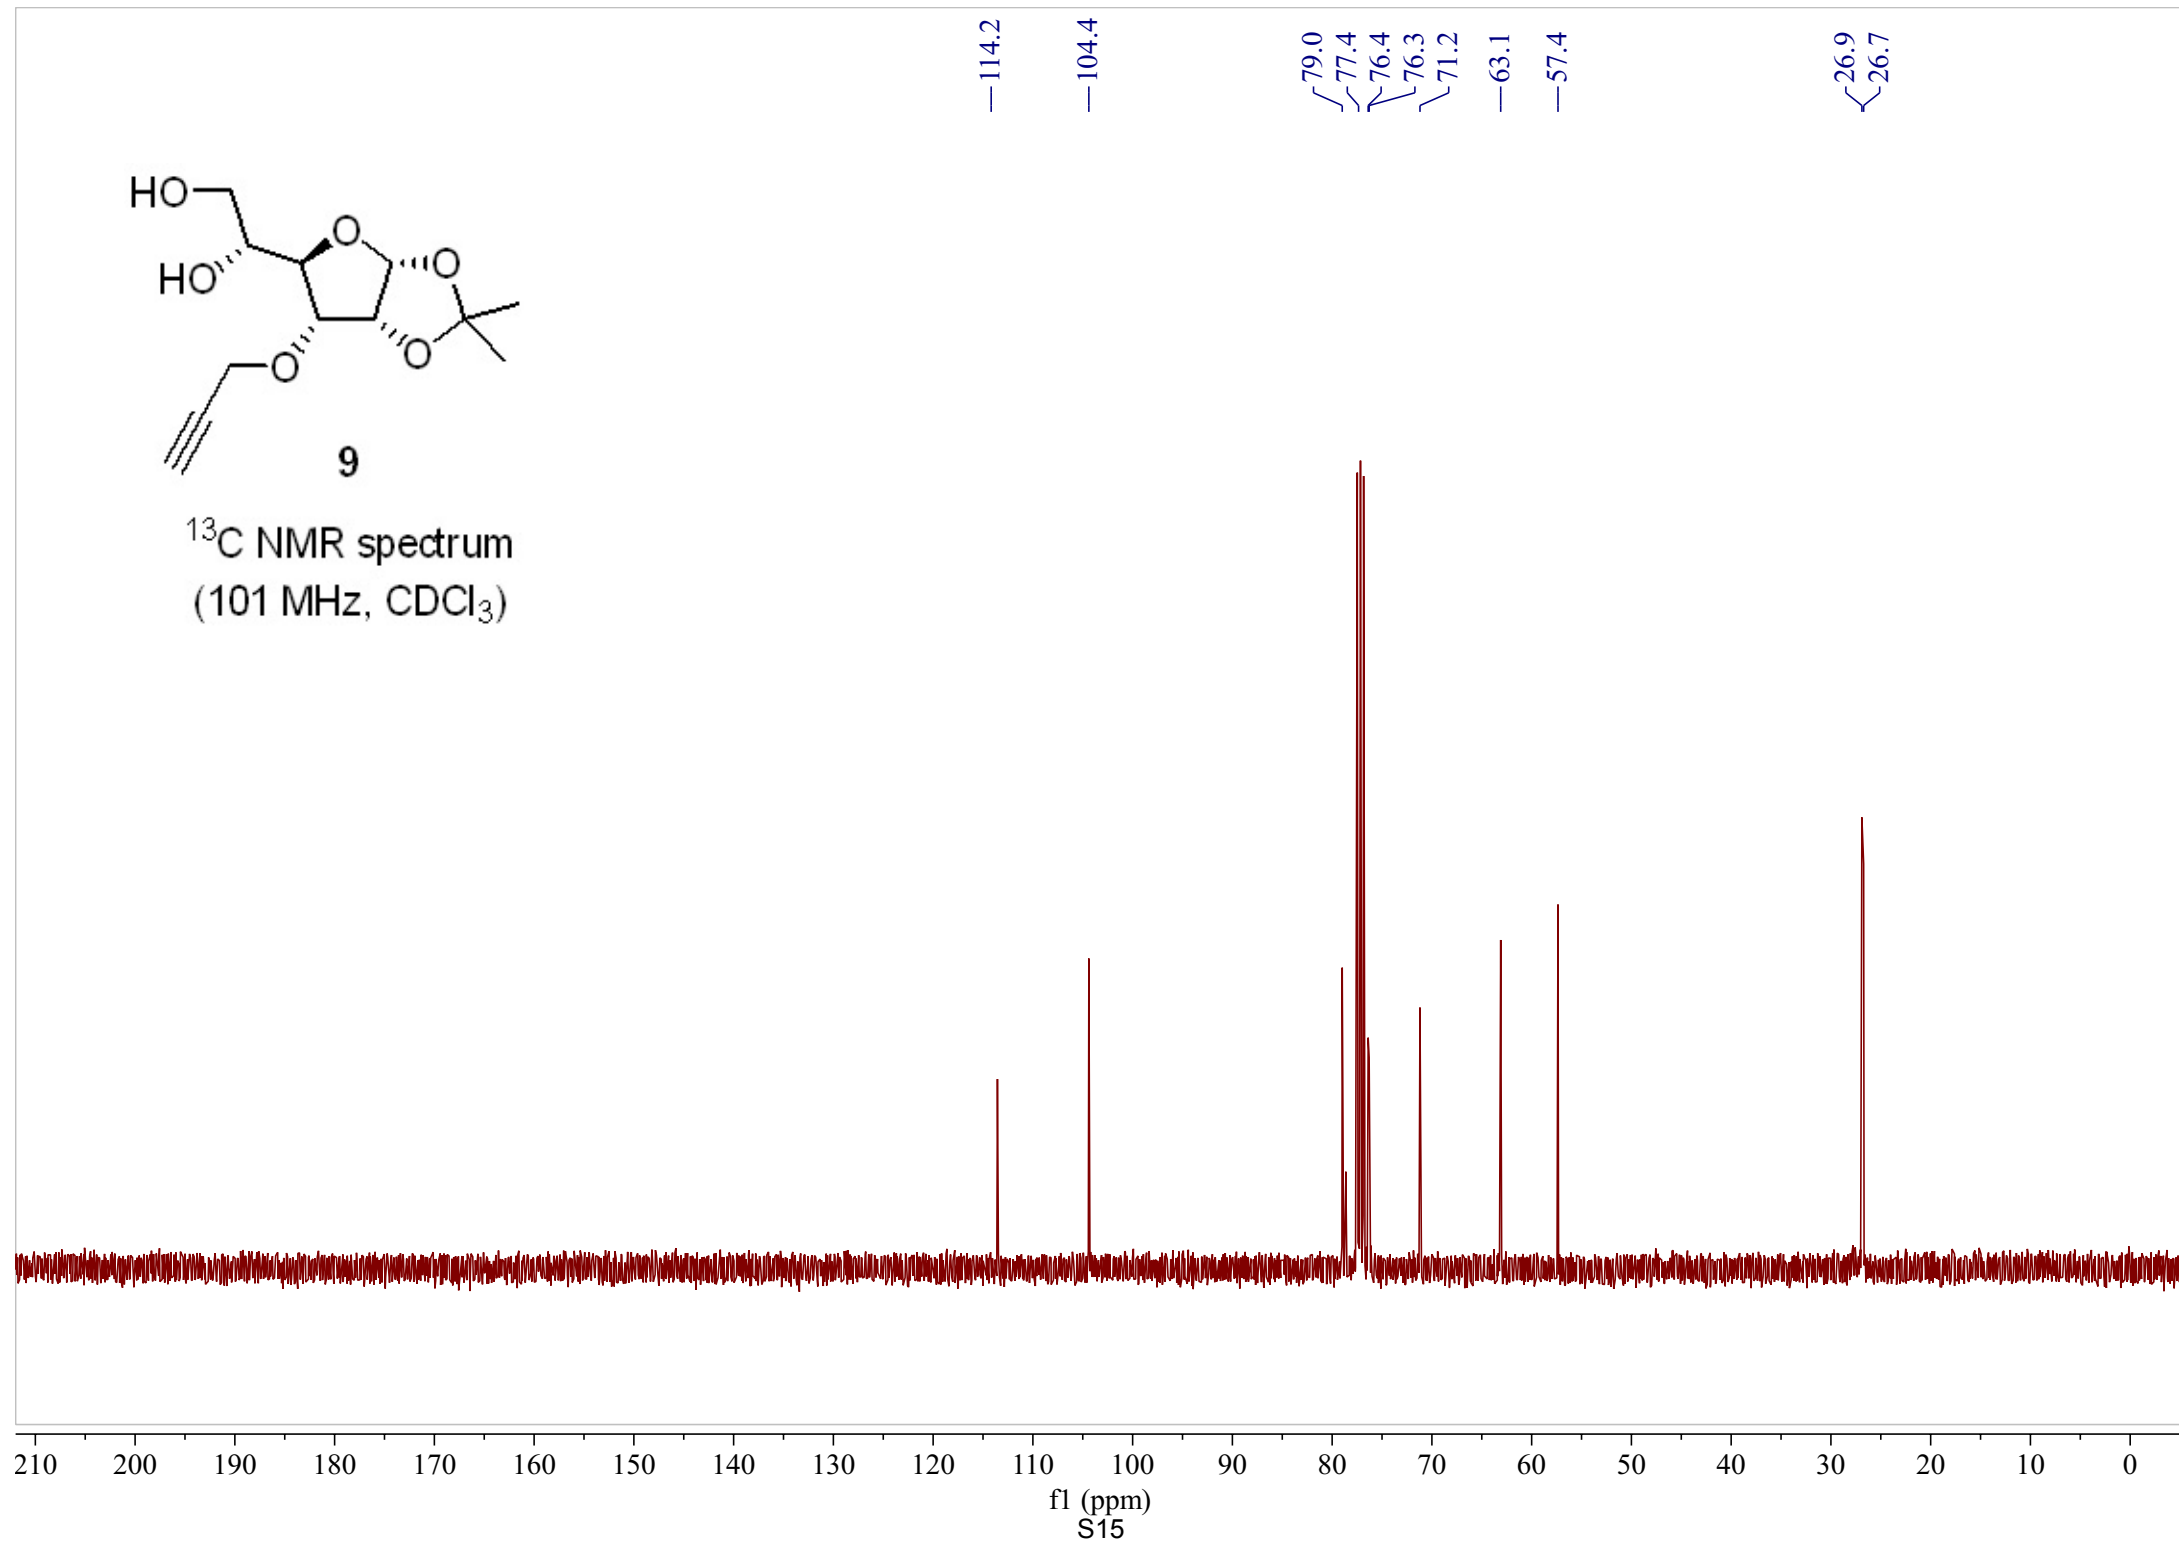

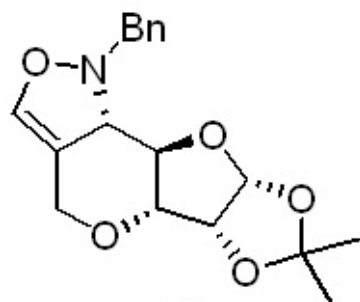

**11**

$^1\text{H}$  NMR spectrum  
(600 MHz,  $\text{CDCl}_3$ )

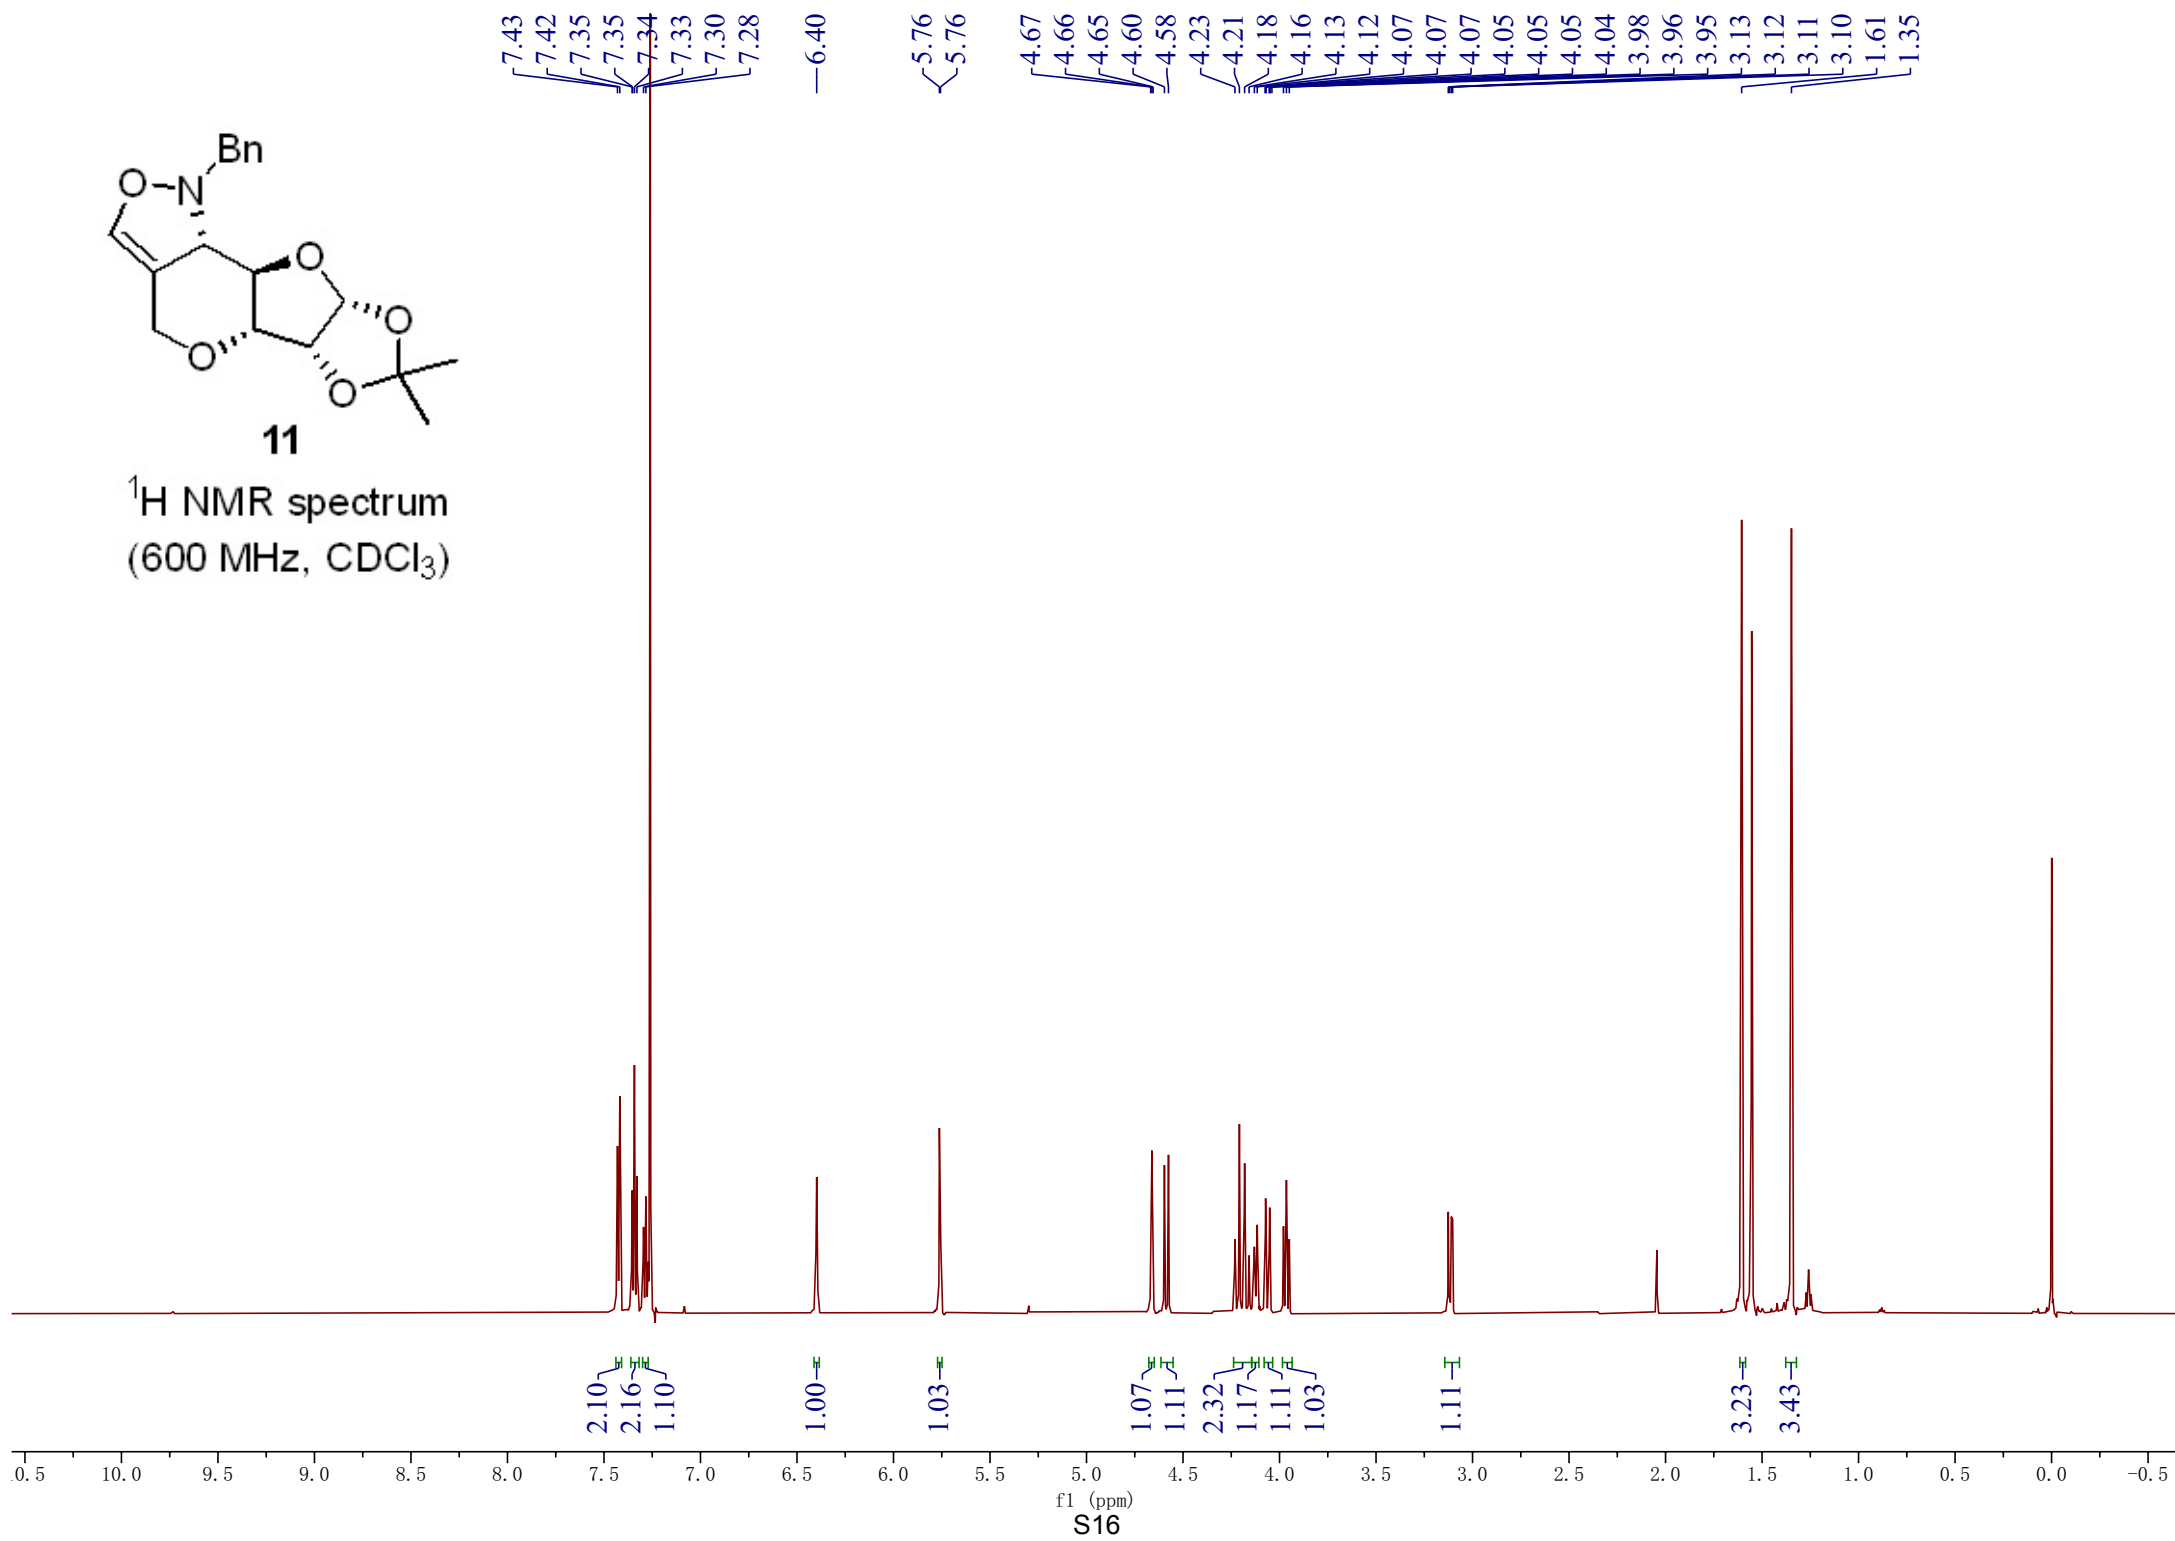

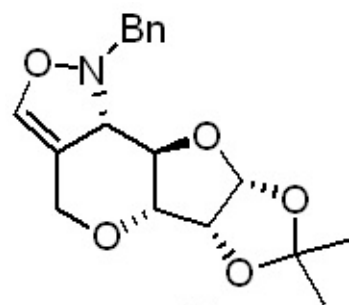

**11**

$^{13}\text{C}$  NMR spectrum  
(151 MHz,  $\text{CDCl}_3$ )

$\sim 139.5$   
 $\sim 136.4$   
 $\sim 129.2$   
 $\sim 128.5$   
 $\sim 127.7$   
 $\sim 113.9$   
 $\sim 104.5$   
 $\sim 104.4$   
 $\sim 79.9$   
 $\sim 76.4$   
 $\sim 74.0$   
 $\sim 64.3$   
 $\sim 64.1$   
 $\sim 26.4$   
 $\sim 26.3$

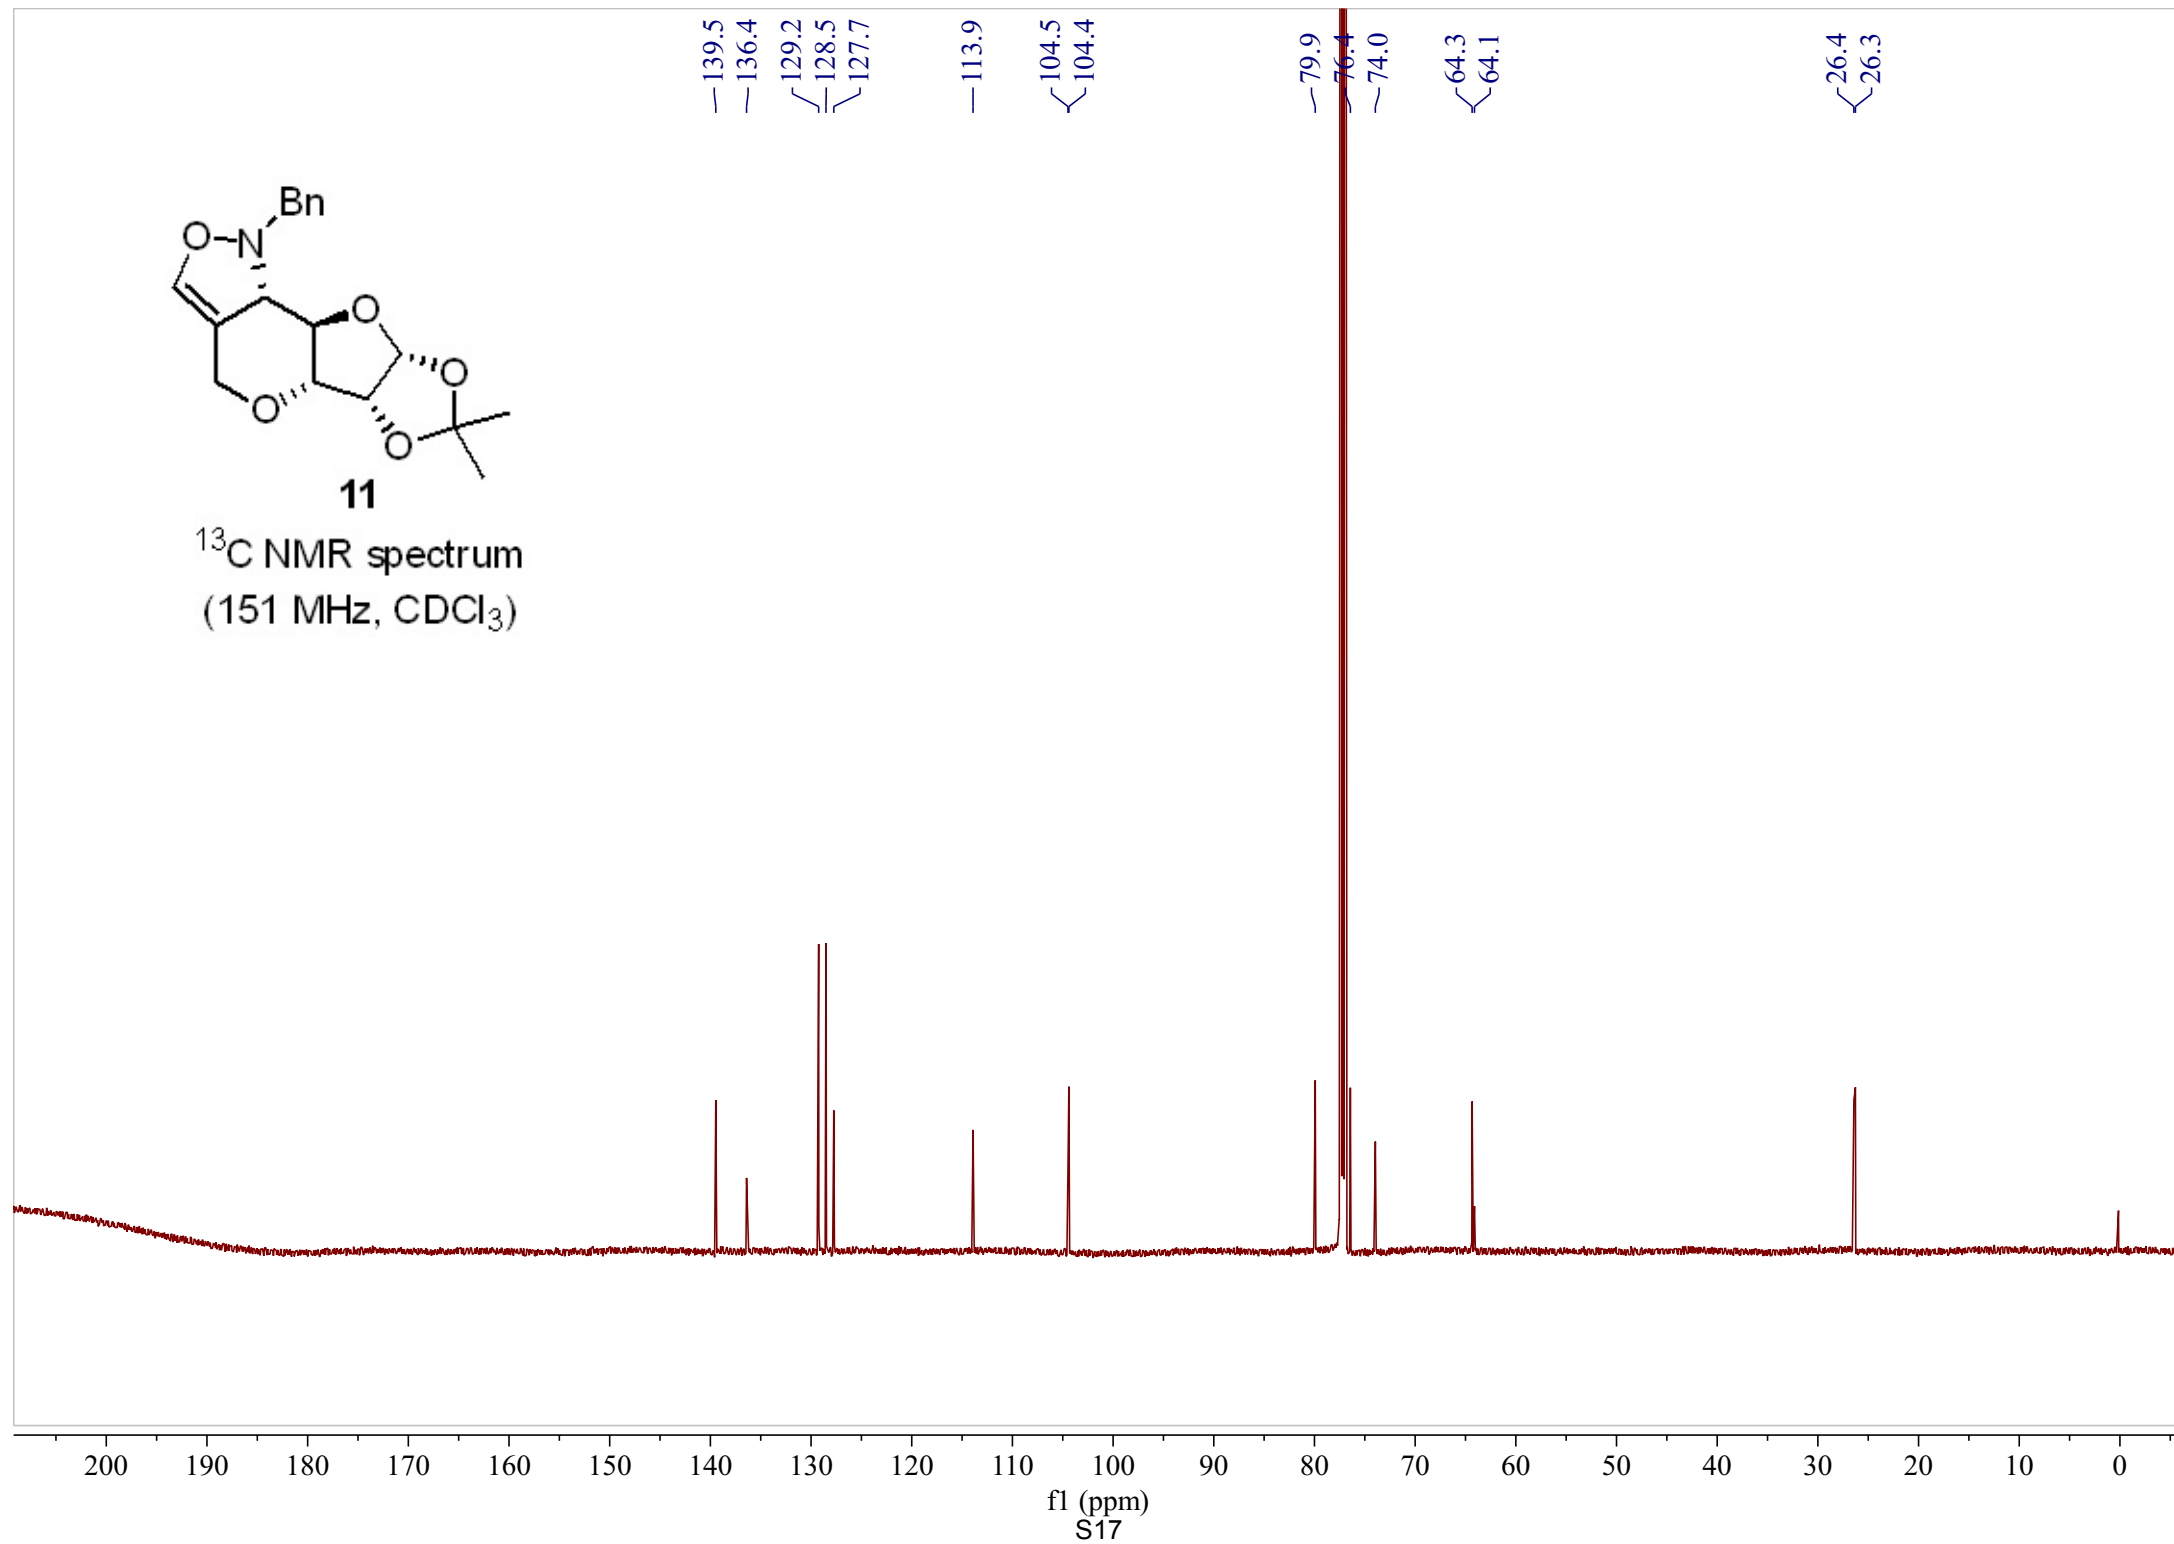

f1 (ppm)  
S17

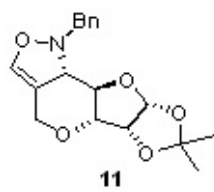

COSY

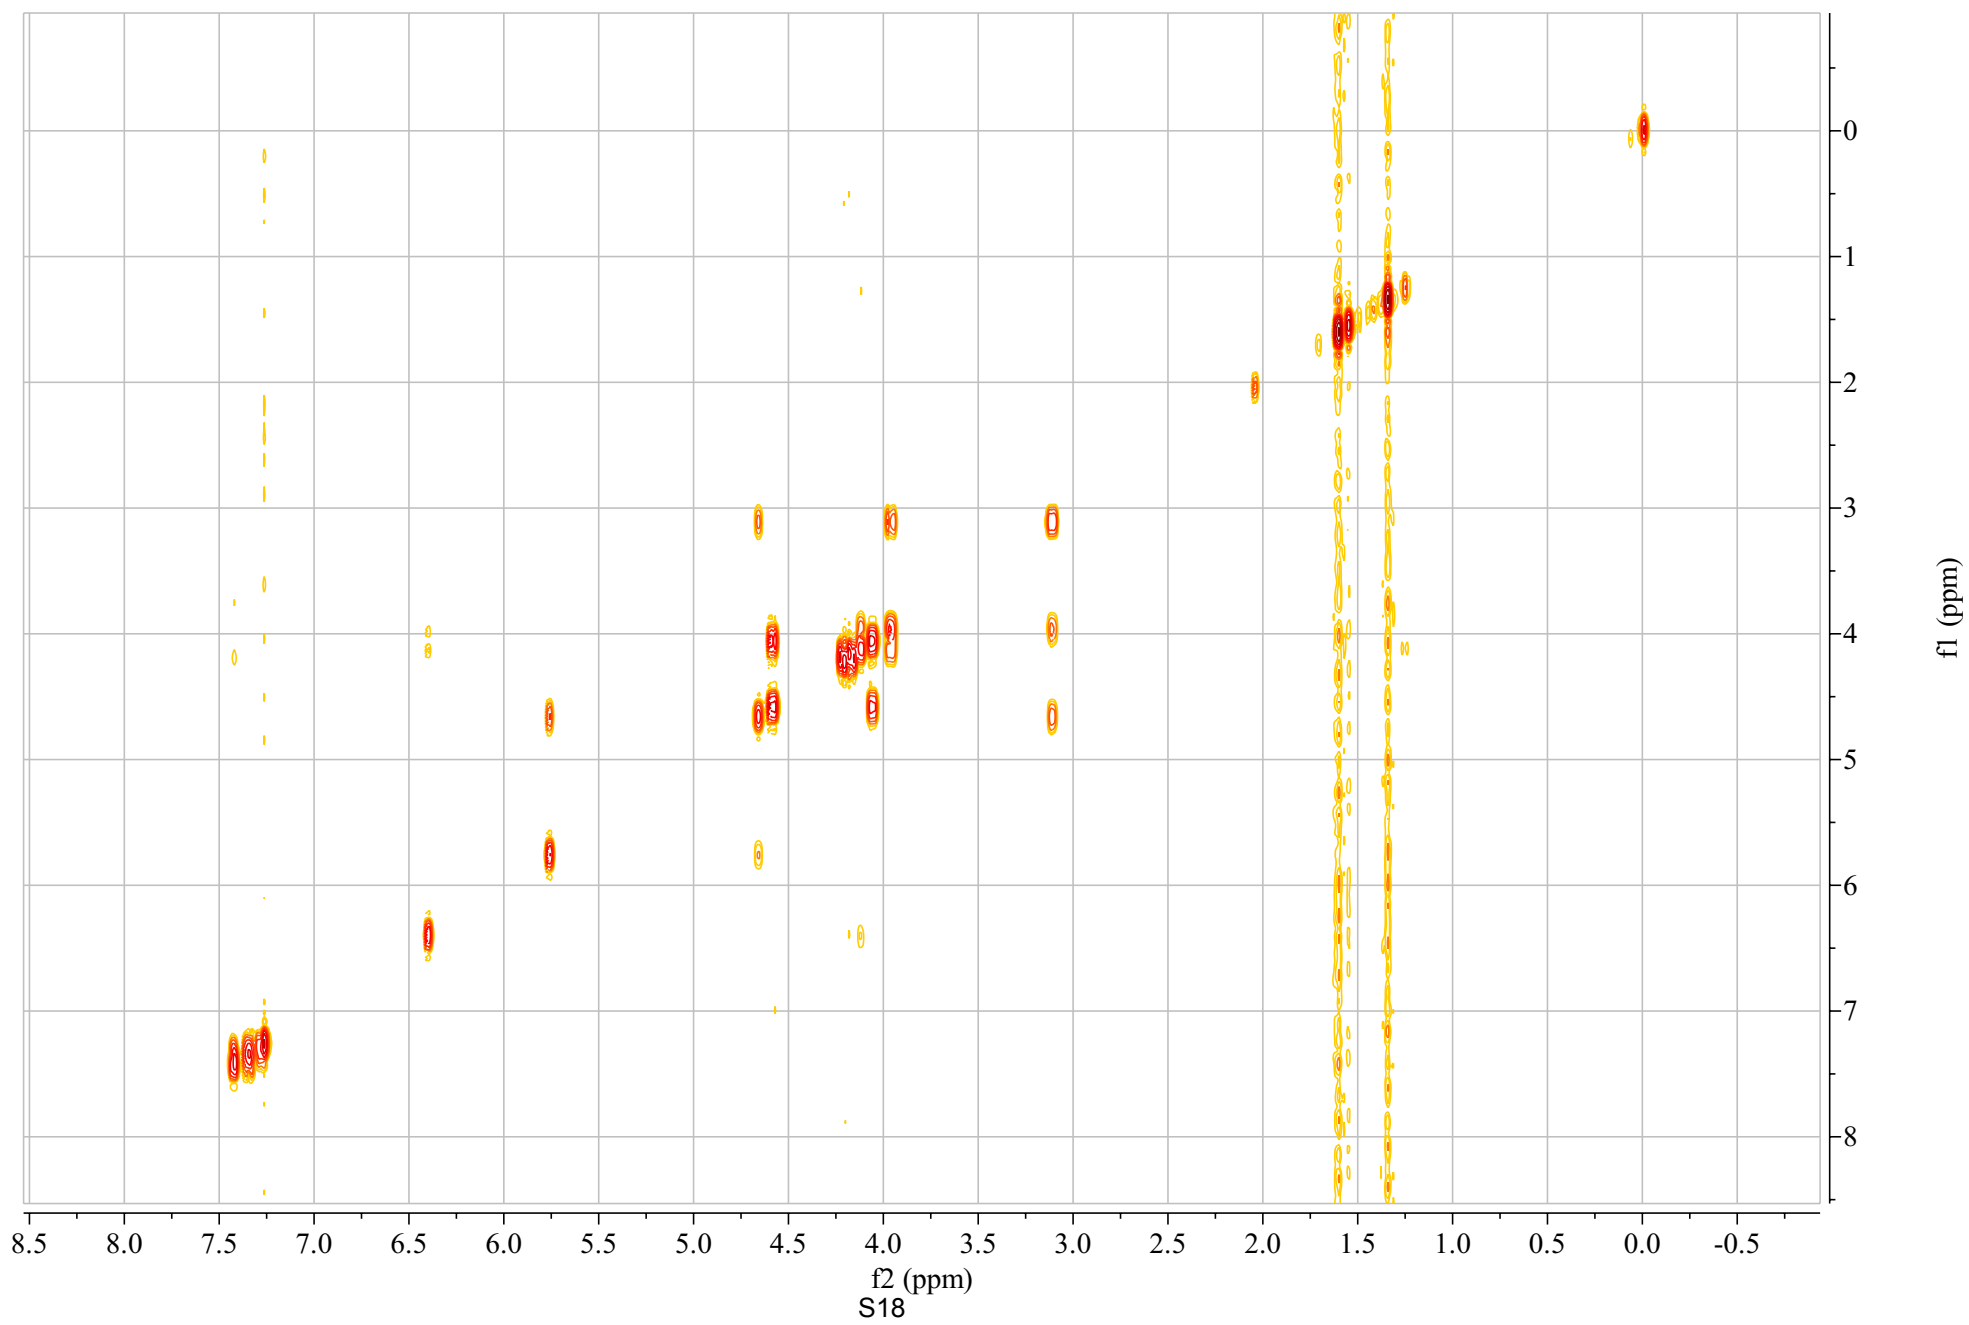

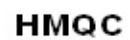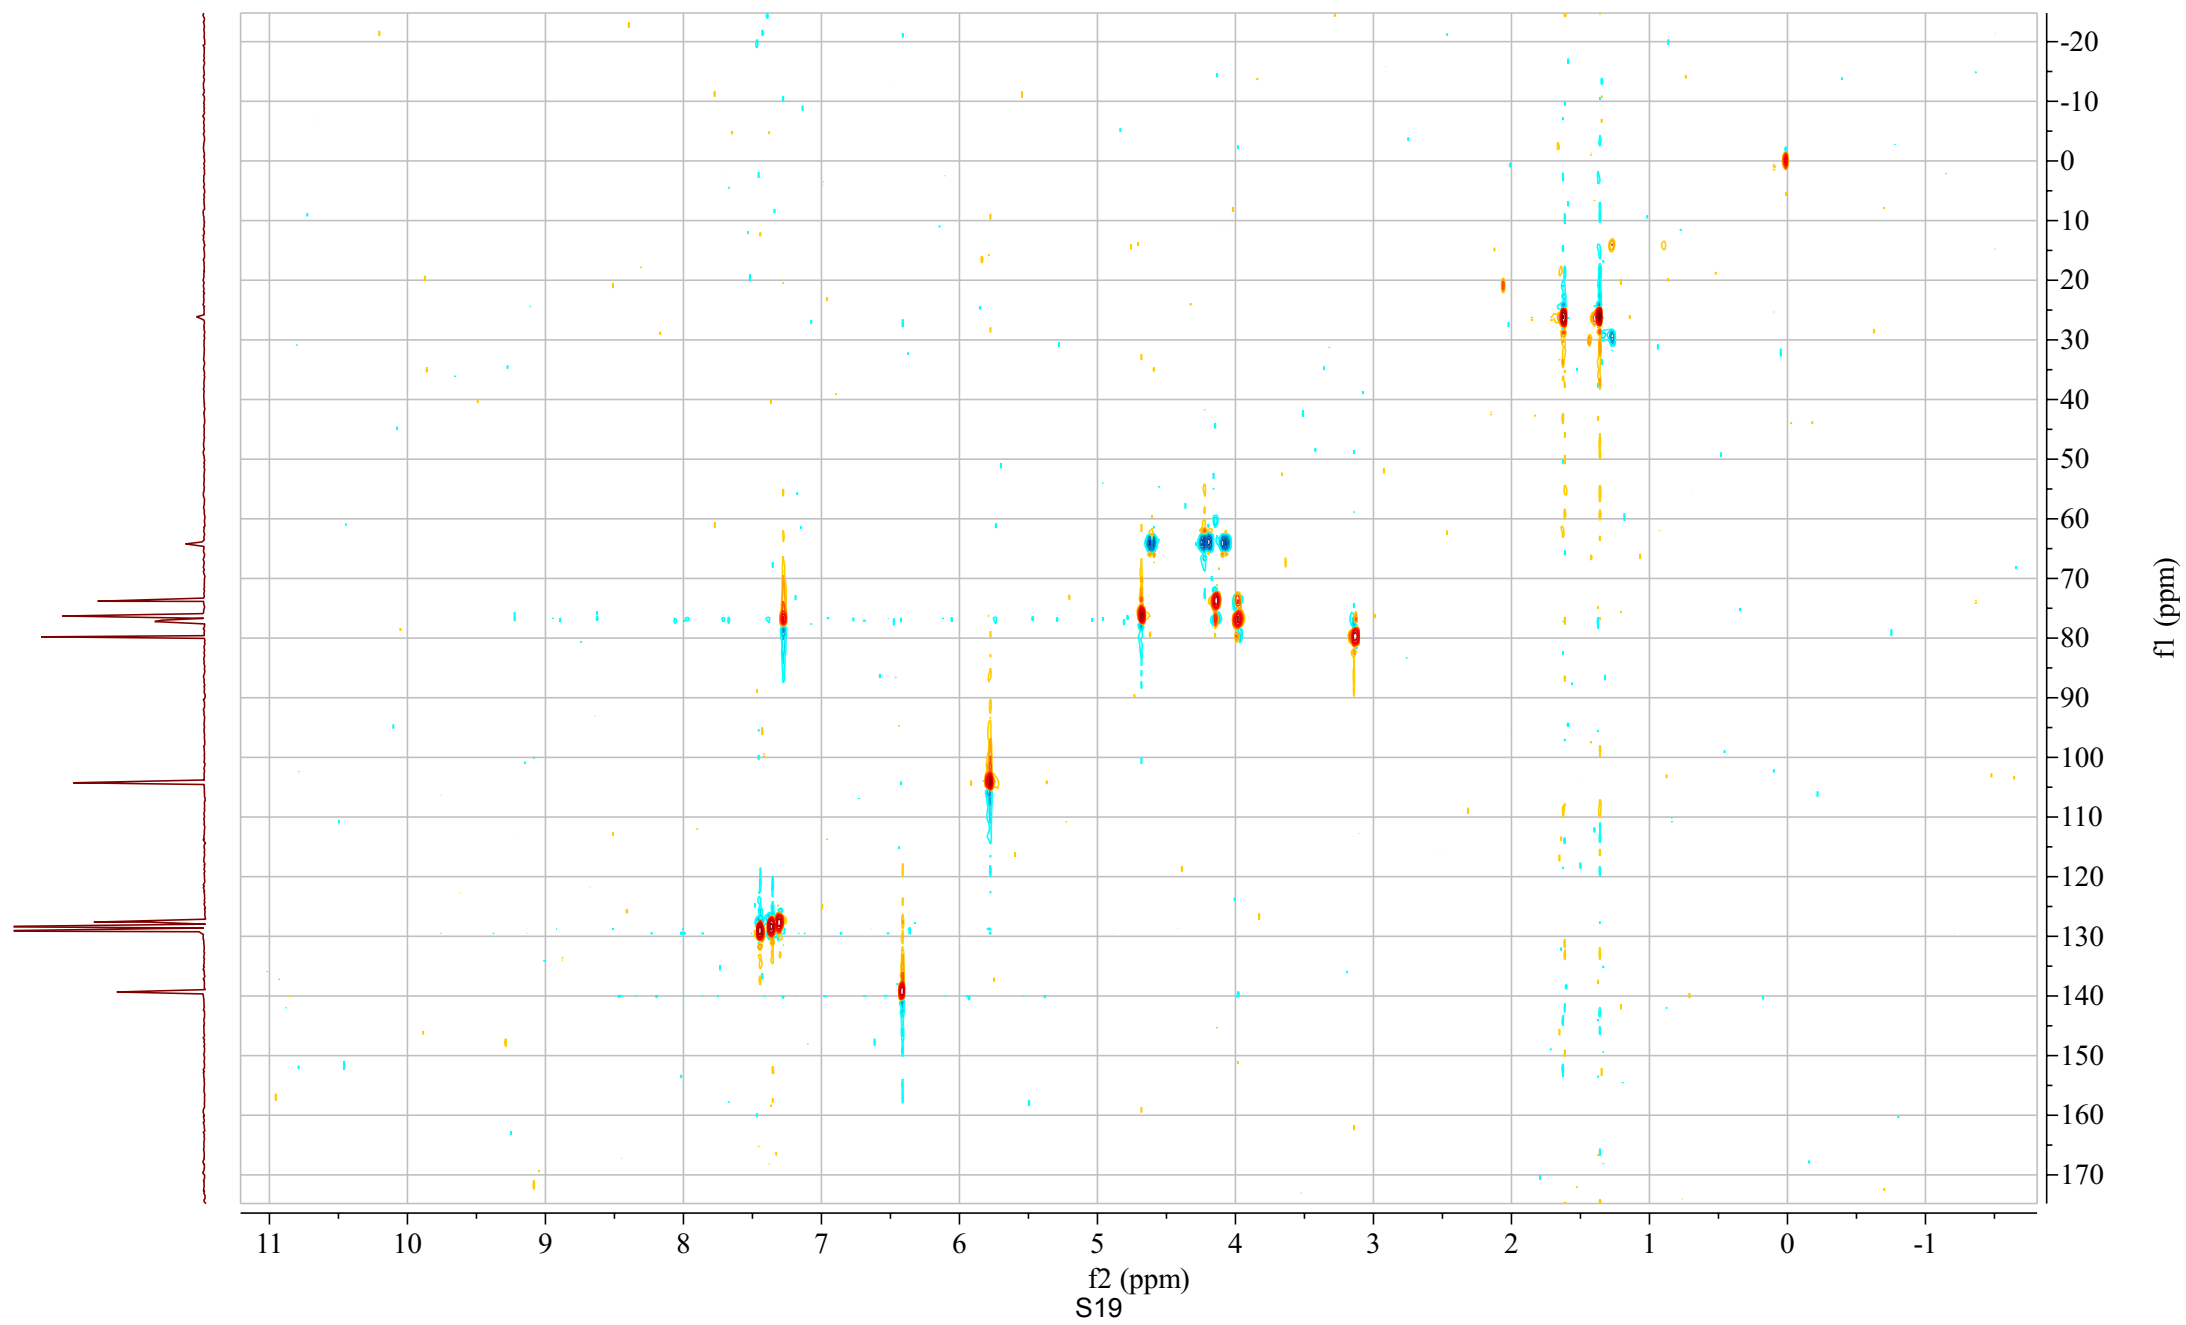

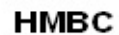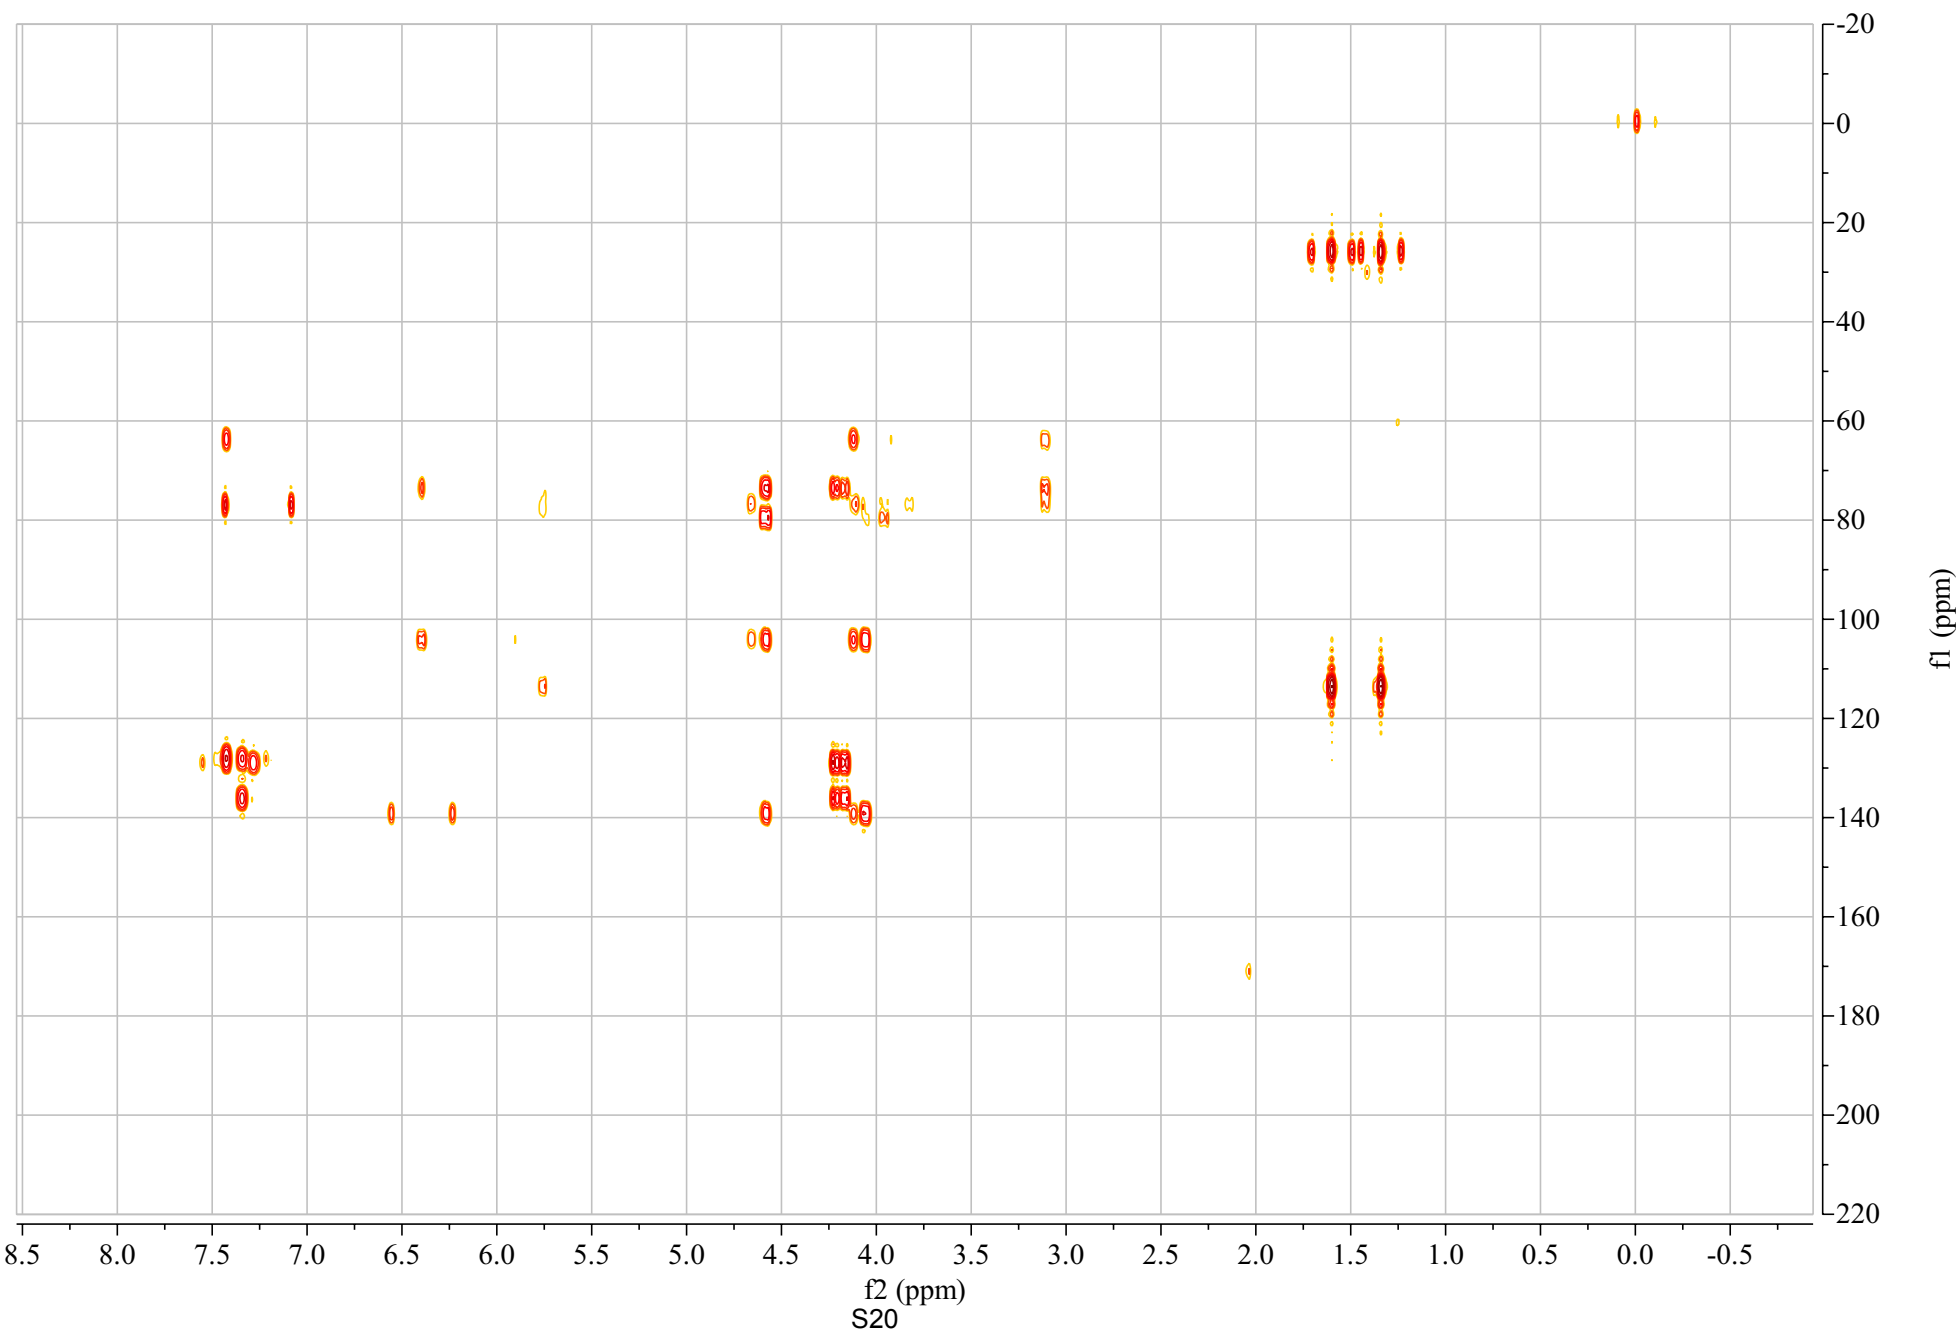

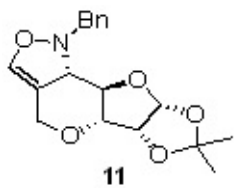

**NOE**

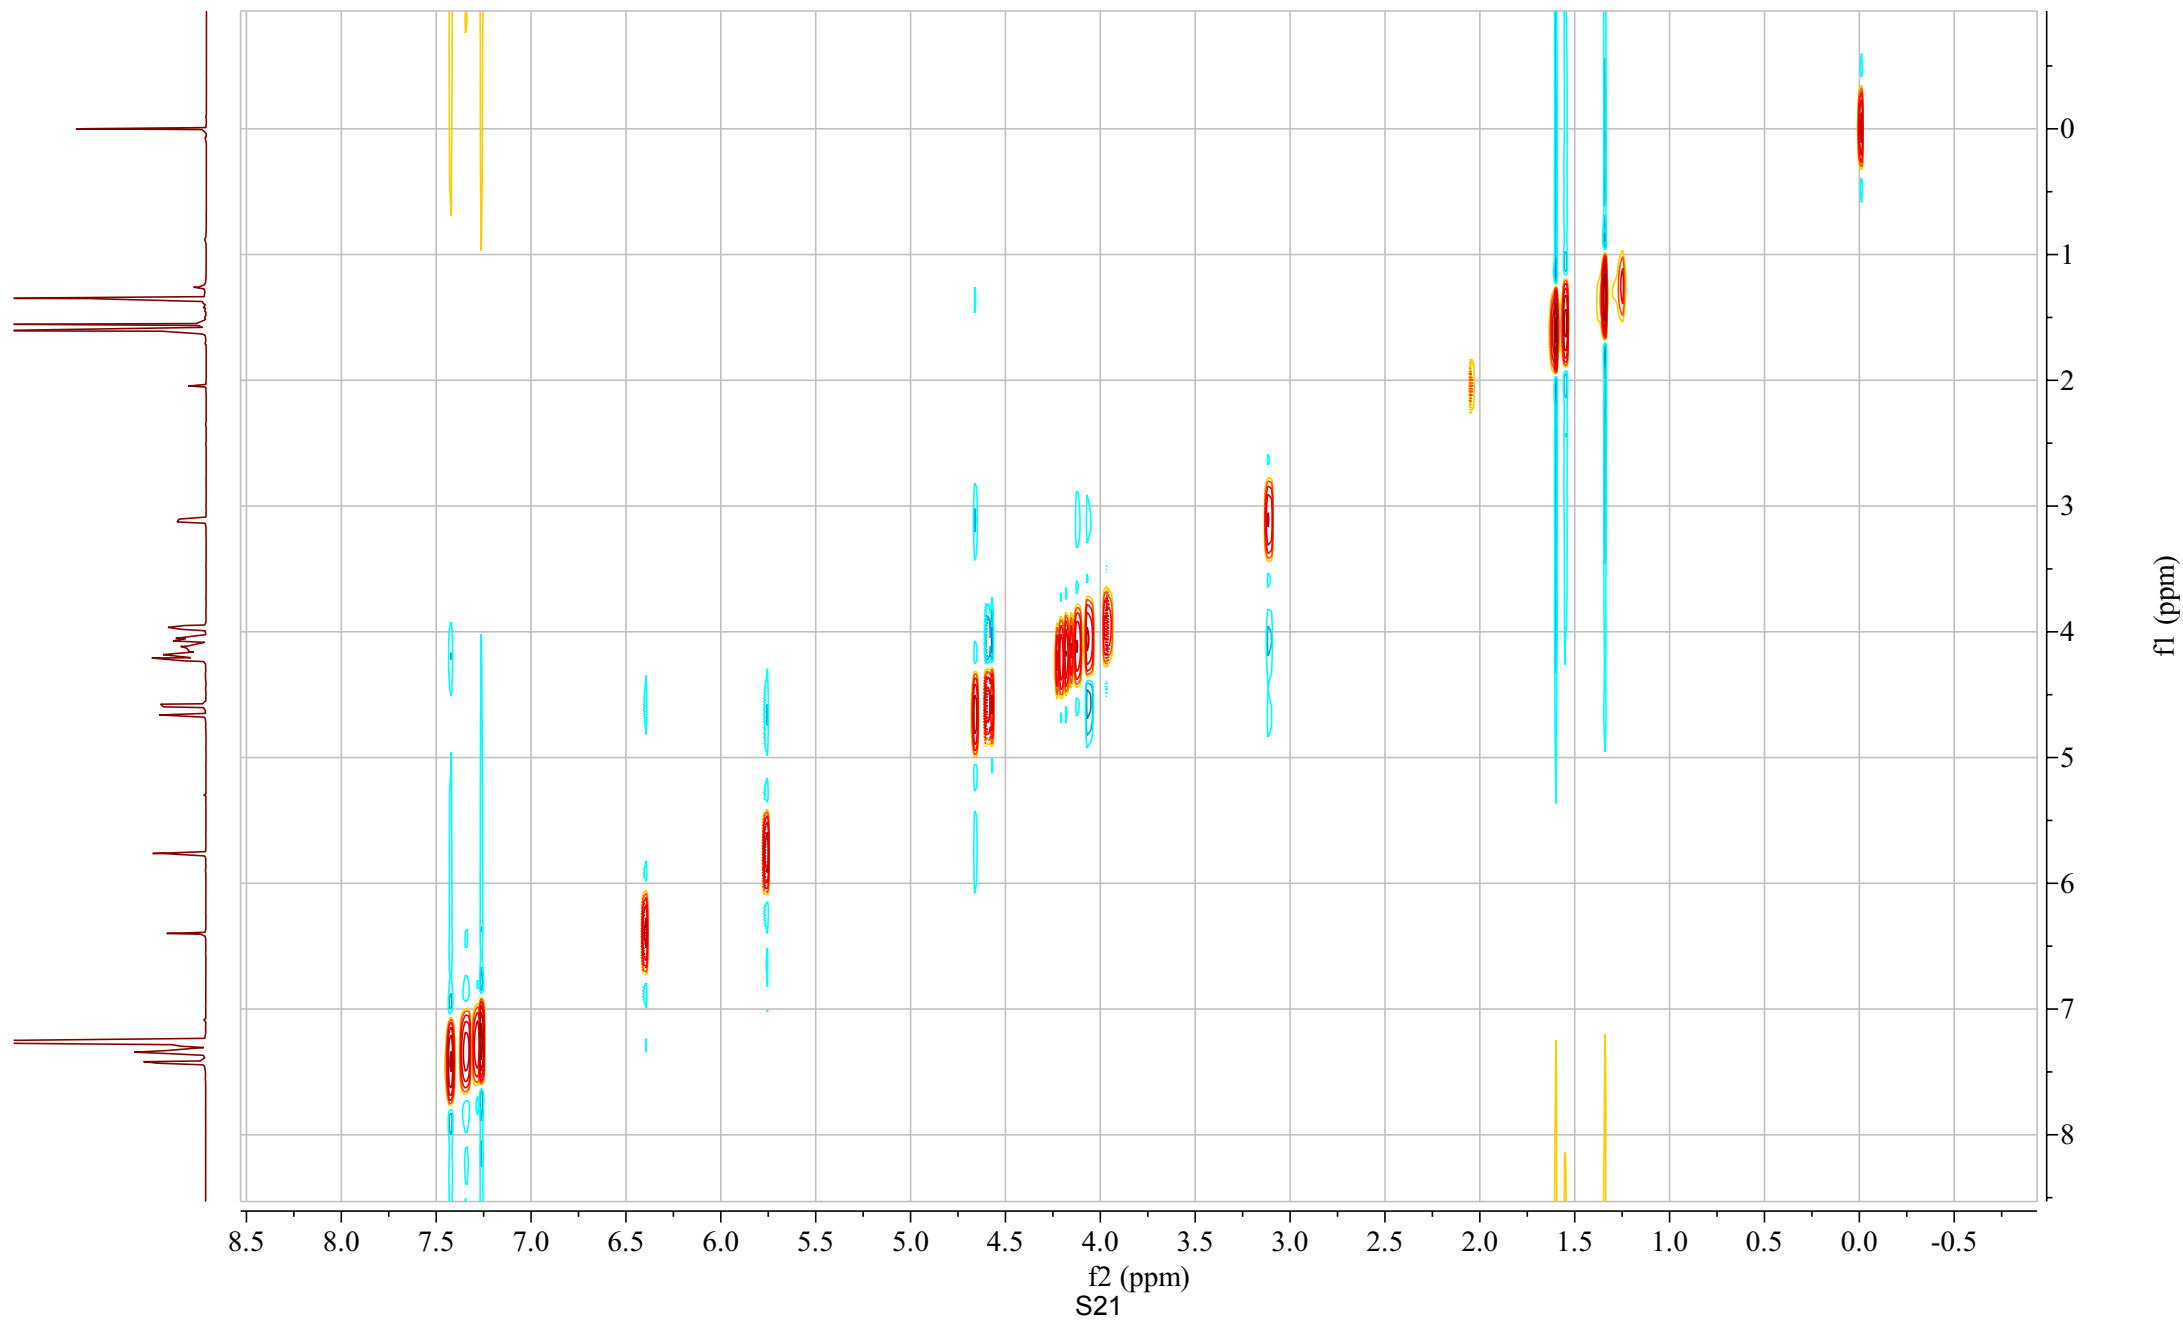

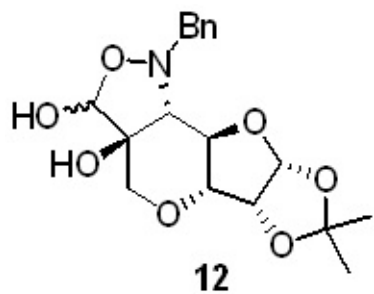

<sup>1</sup>H NMR spectrum  
(400 MHz, CDCl<sub>3</sub>)

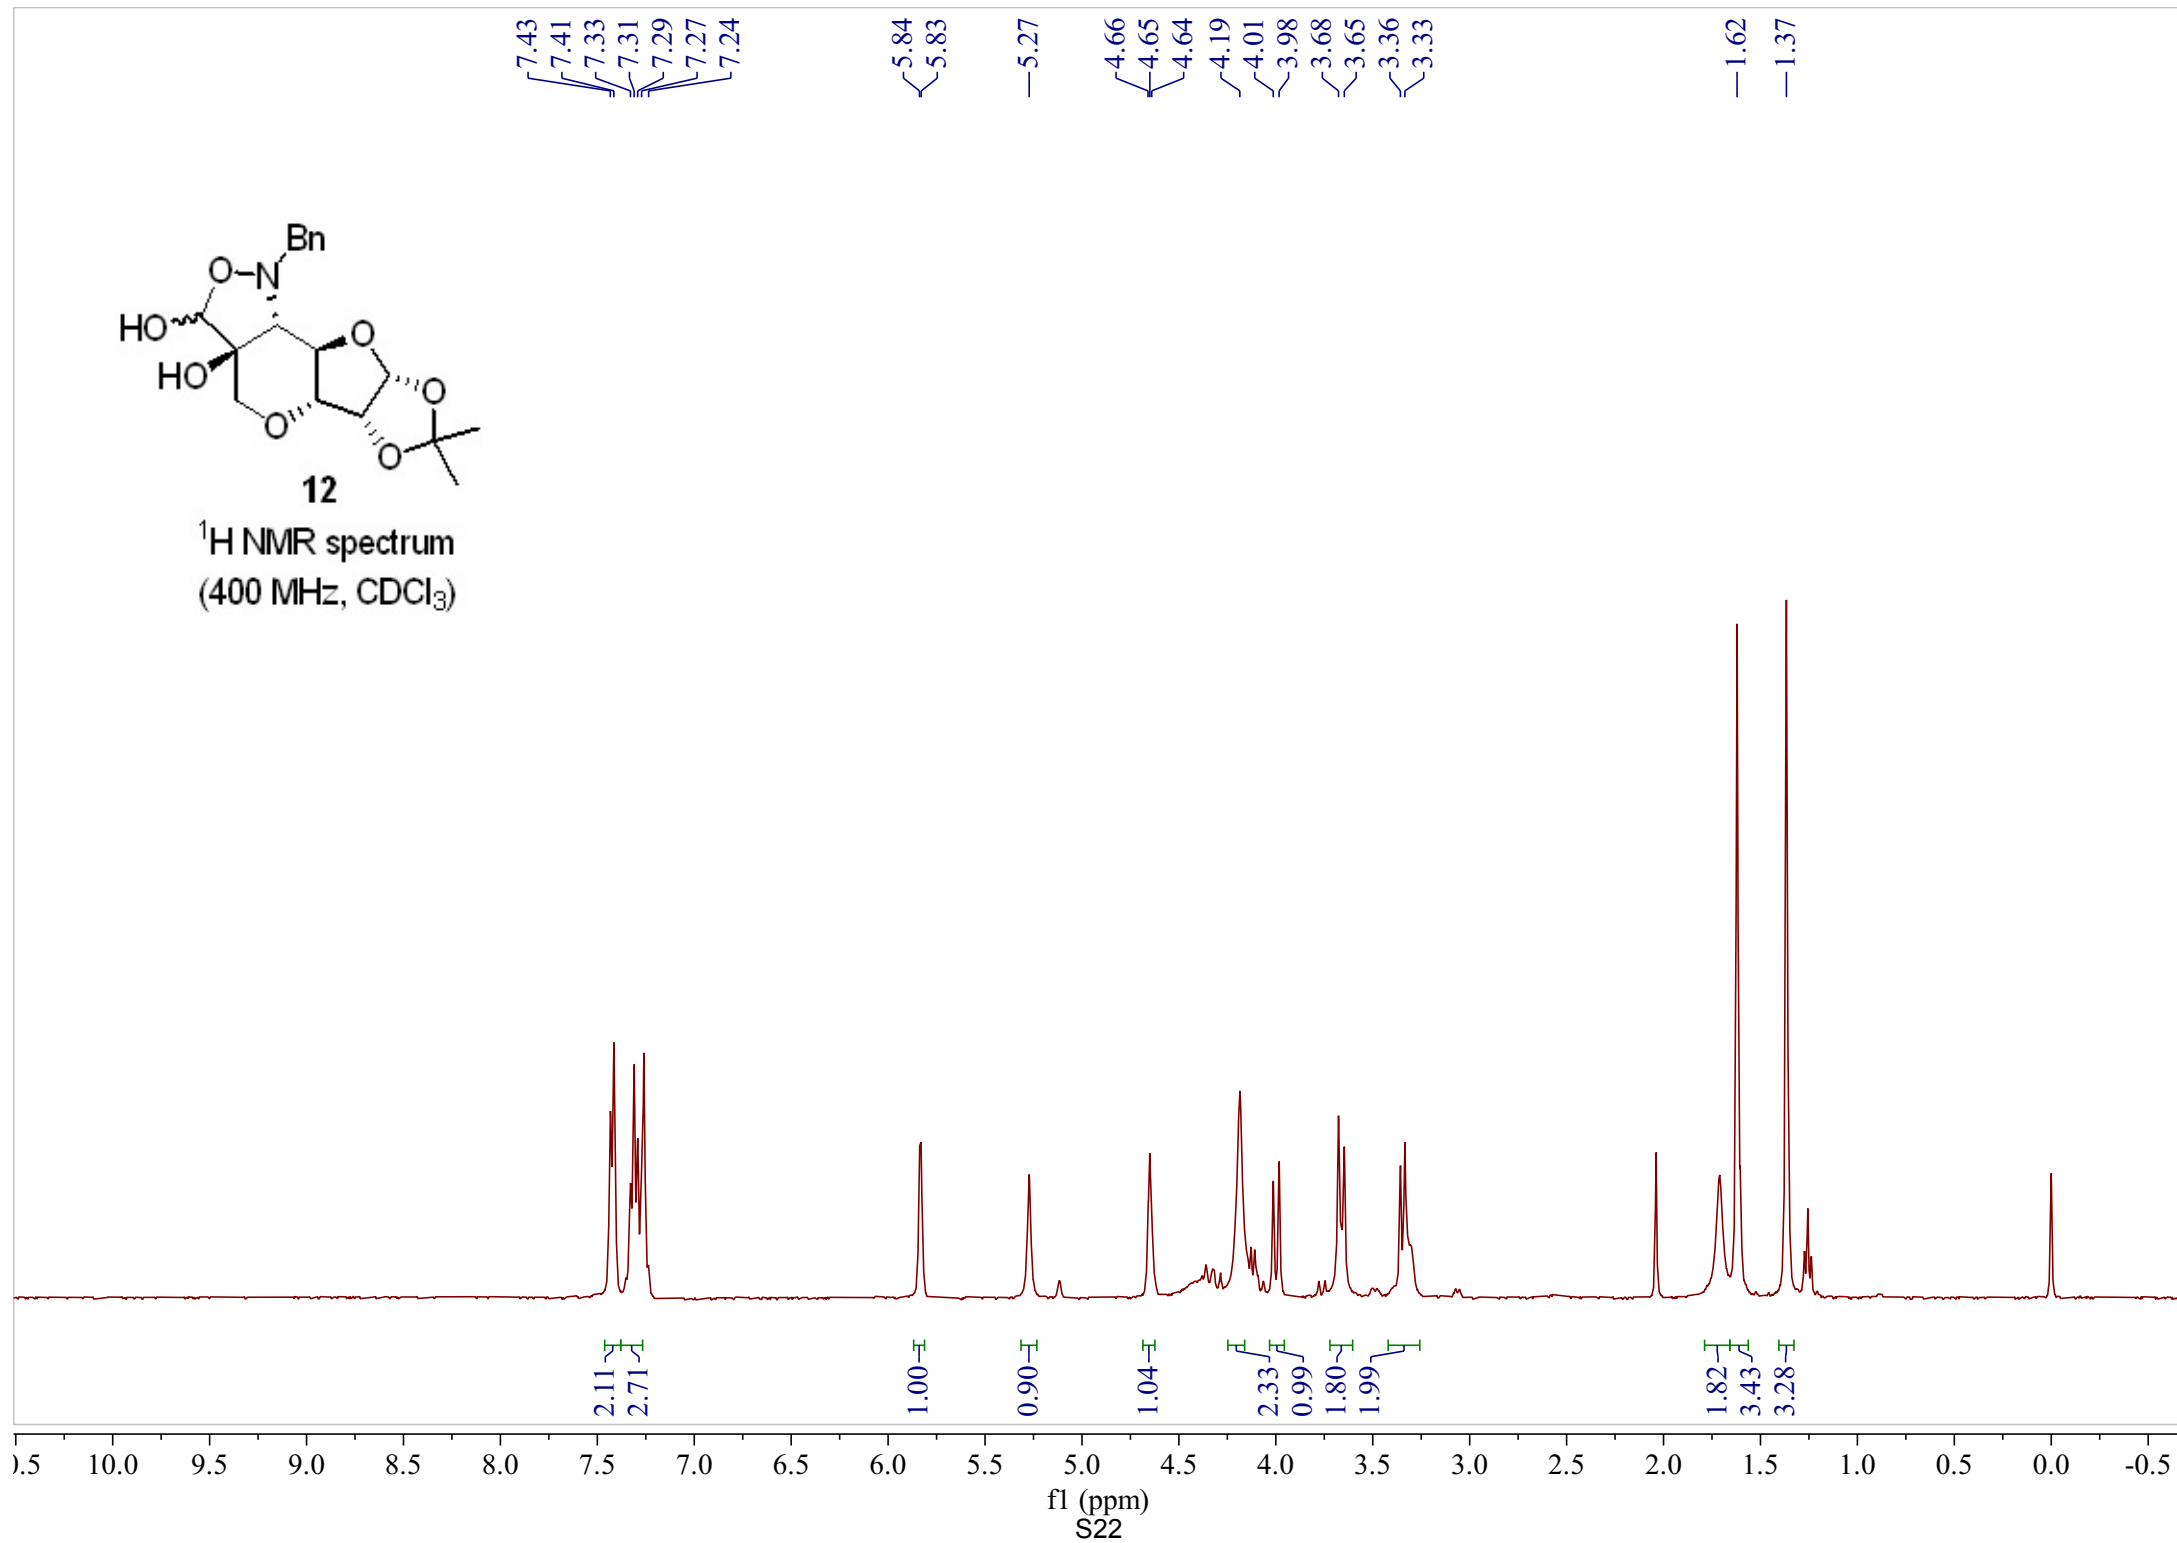

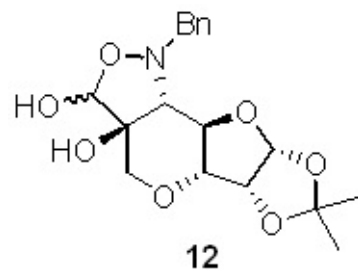

$^{13}\text{C}$  NMR spectrum  
(101 MHz,  $\text{CDCl}_3$ )

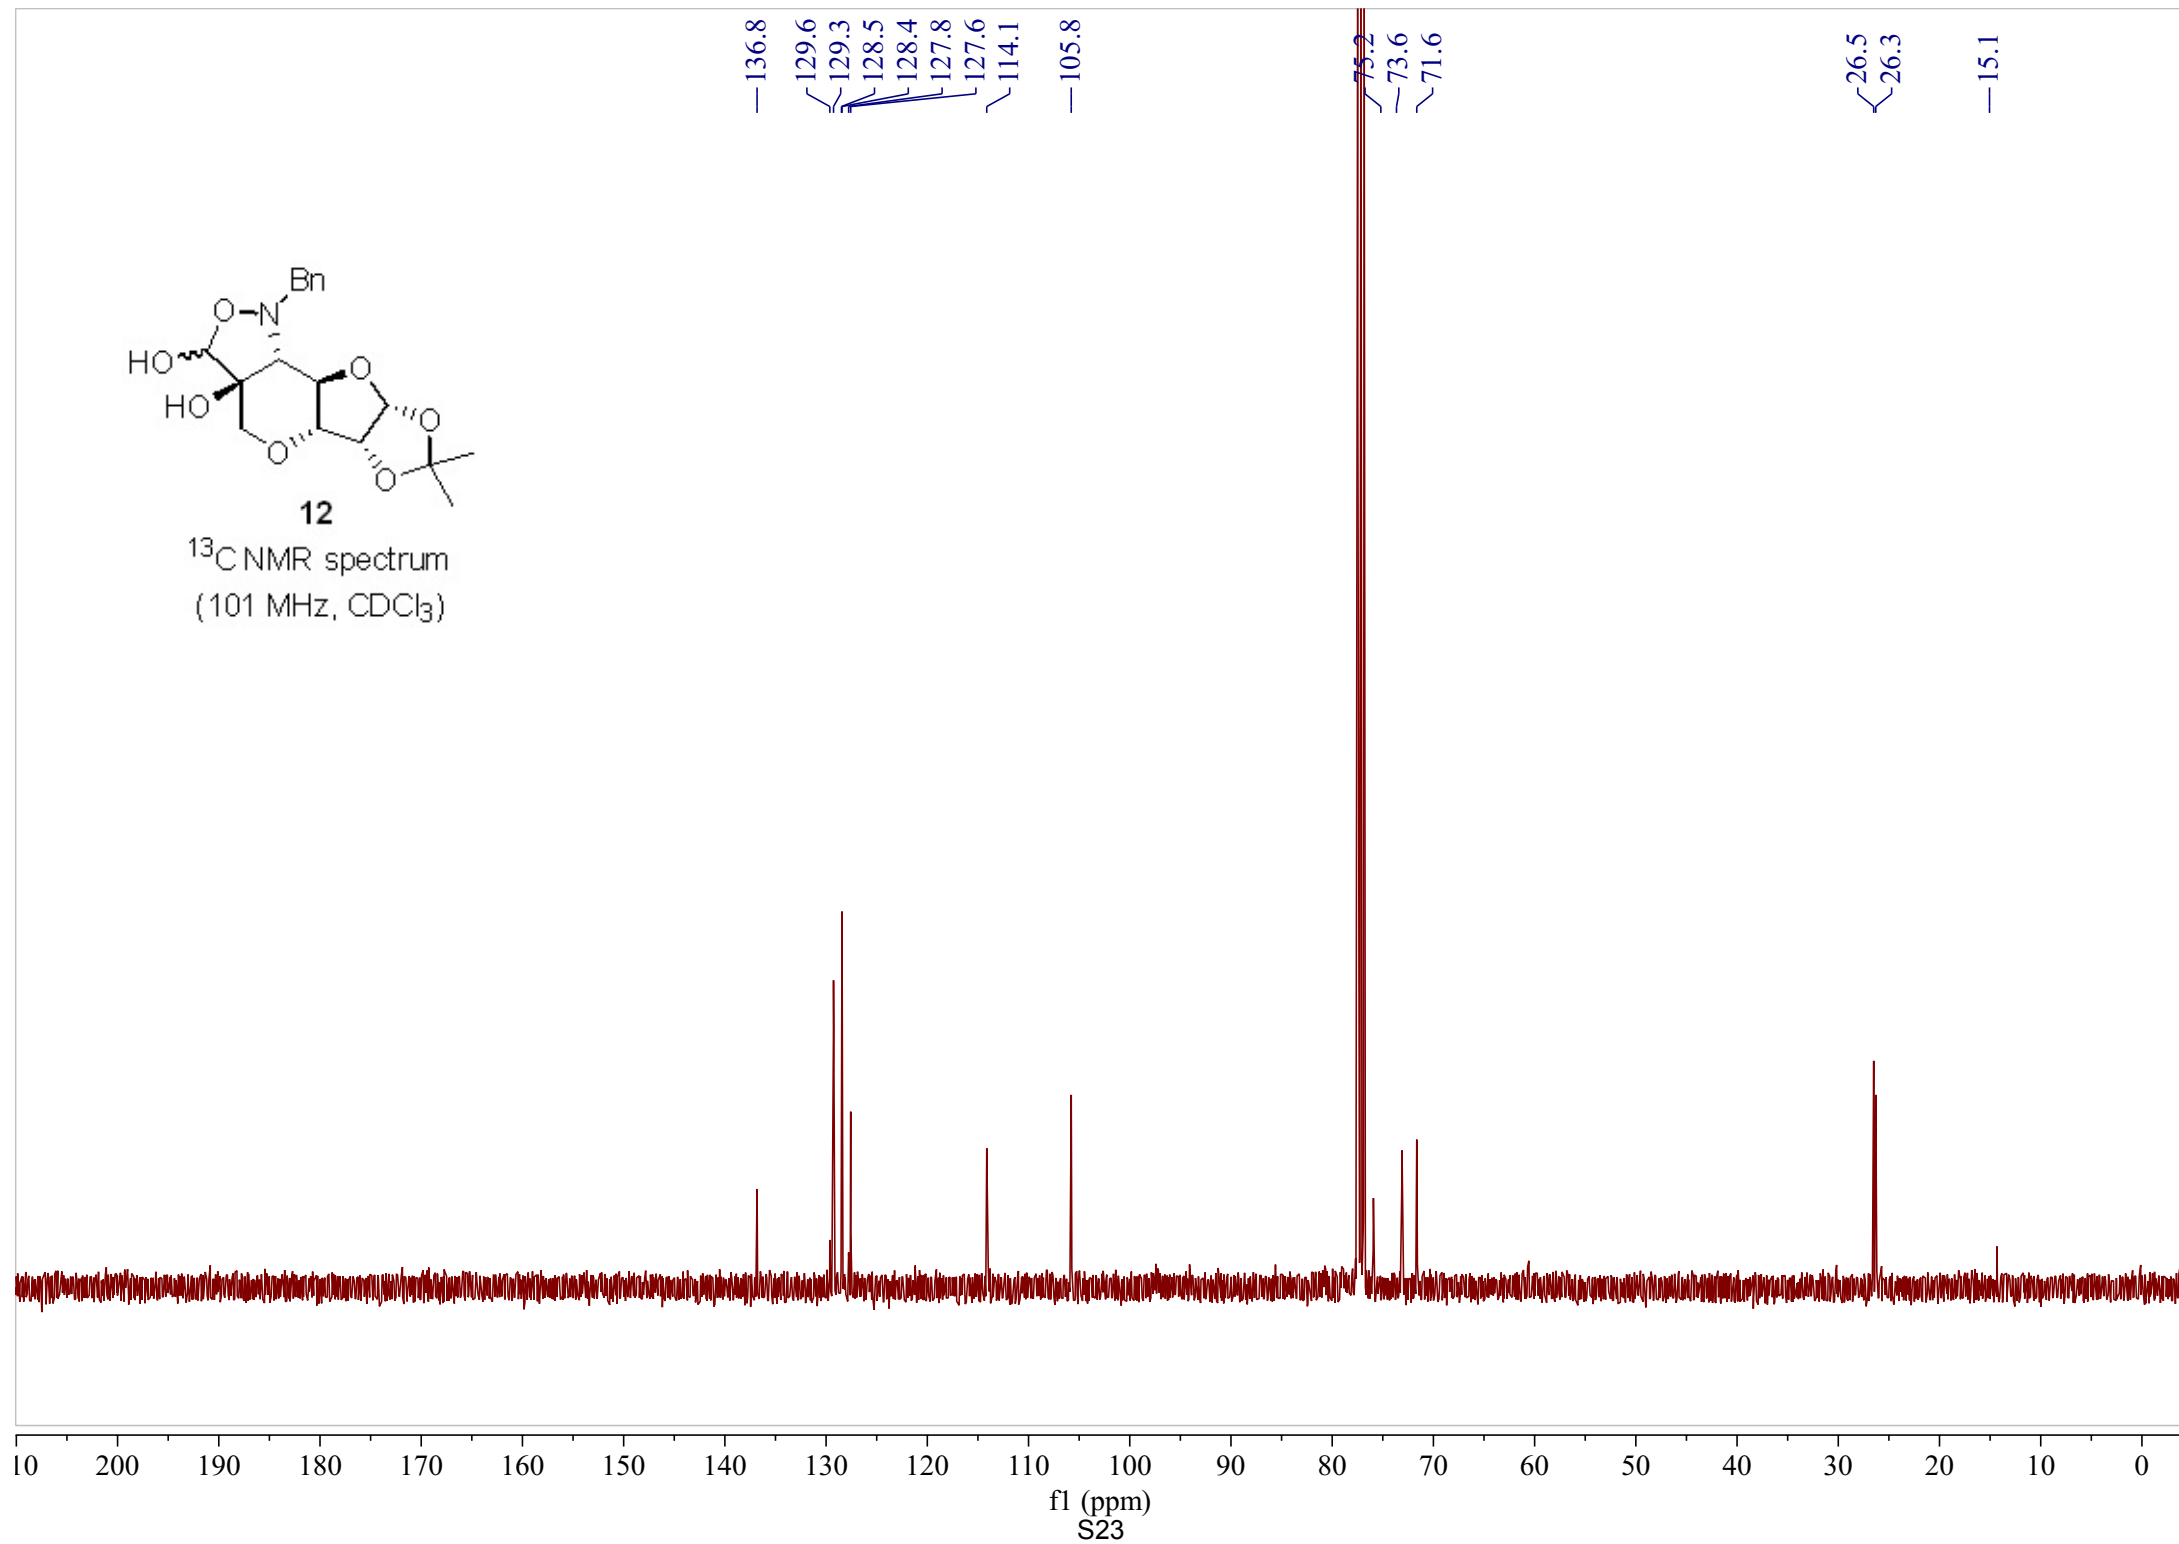

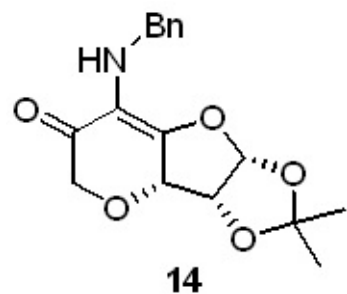

**14**  
<sup>1</sup>H NMR spectrum  
 (500 MHz, CDCl<sub>3</sub>)

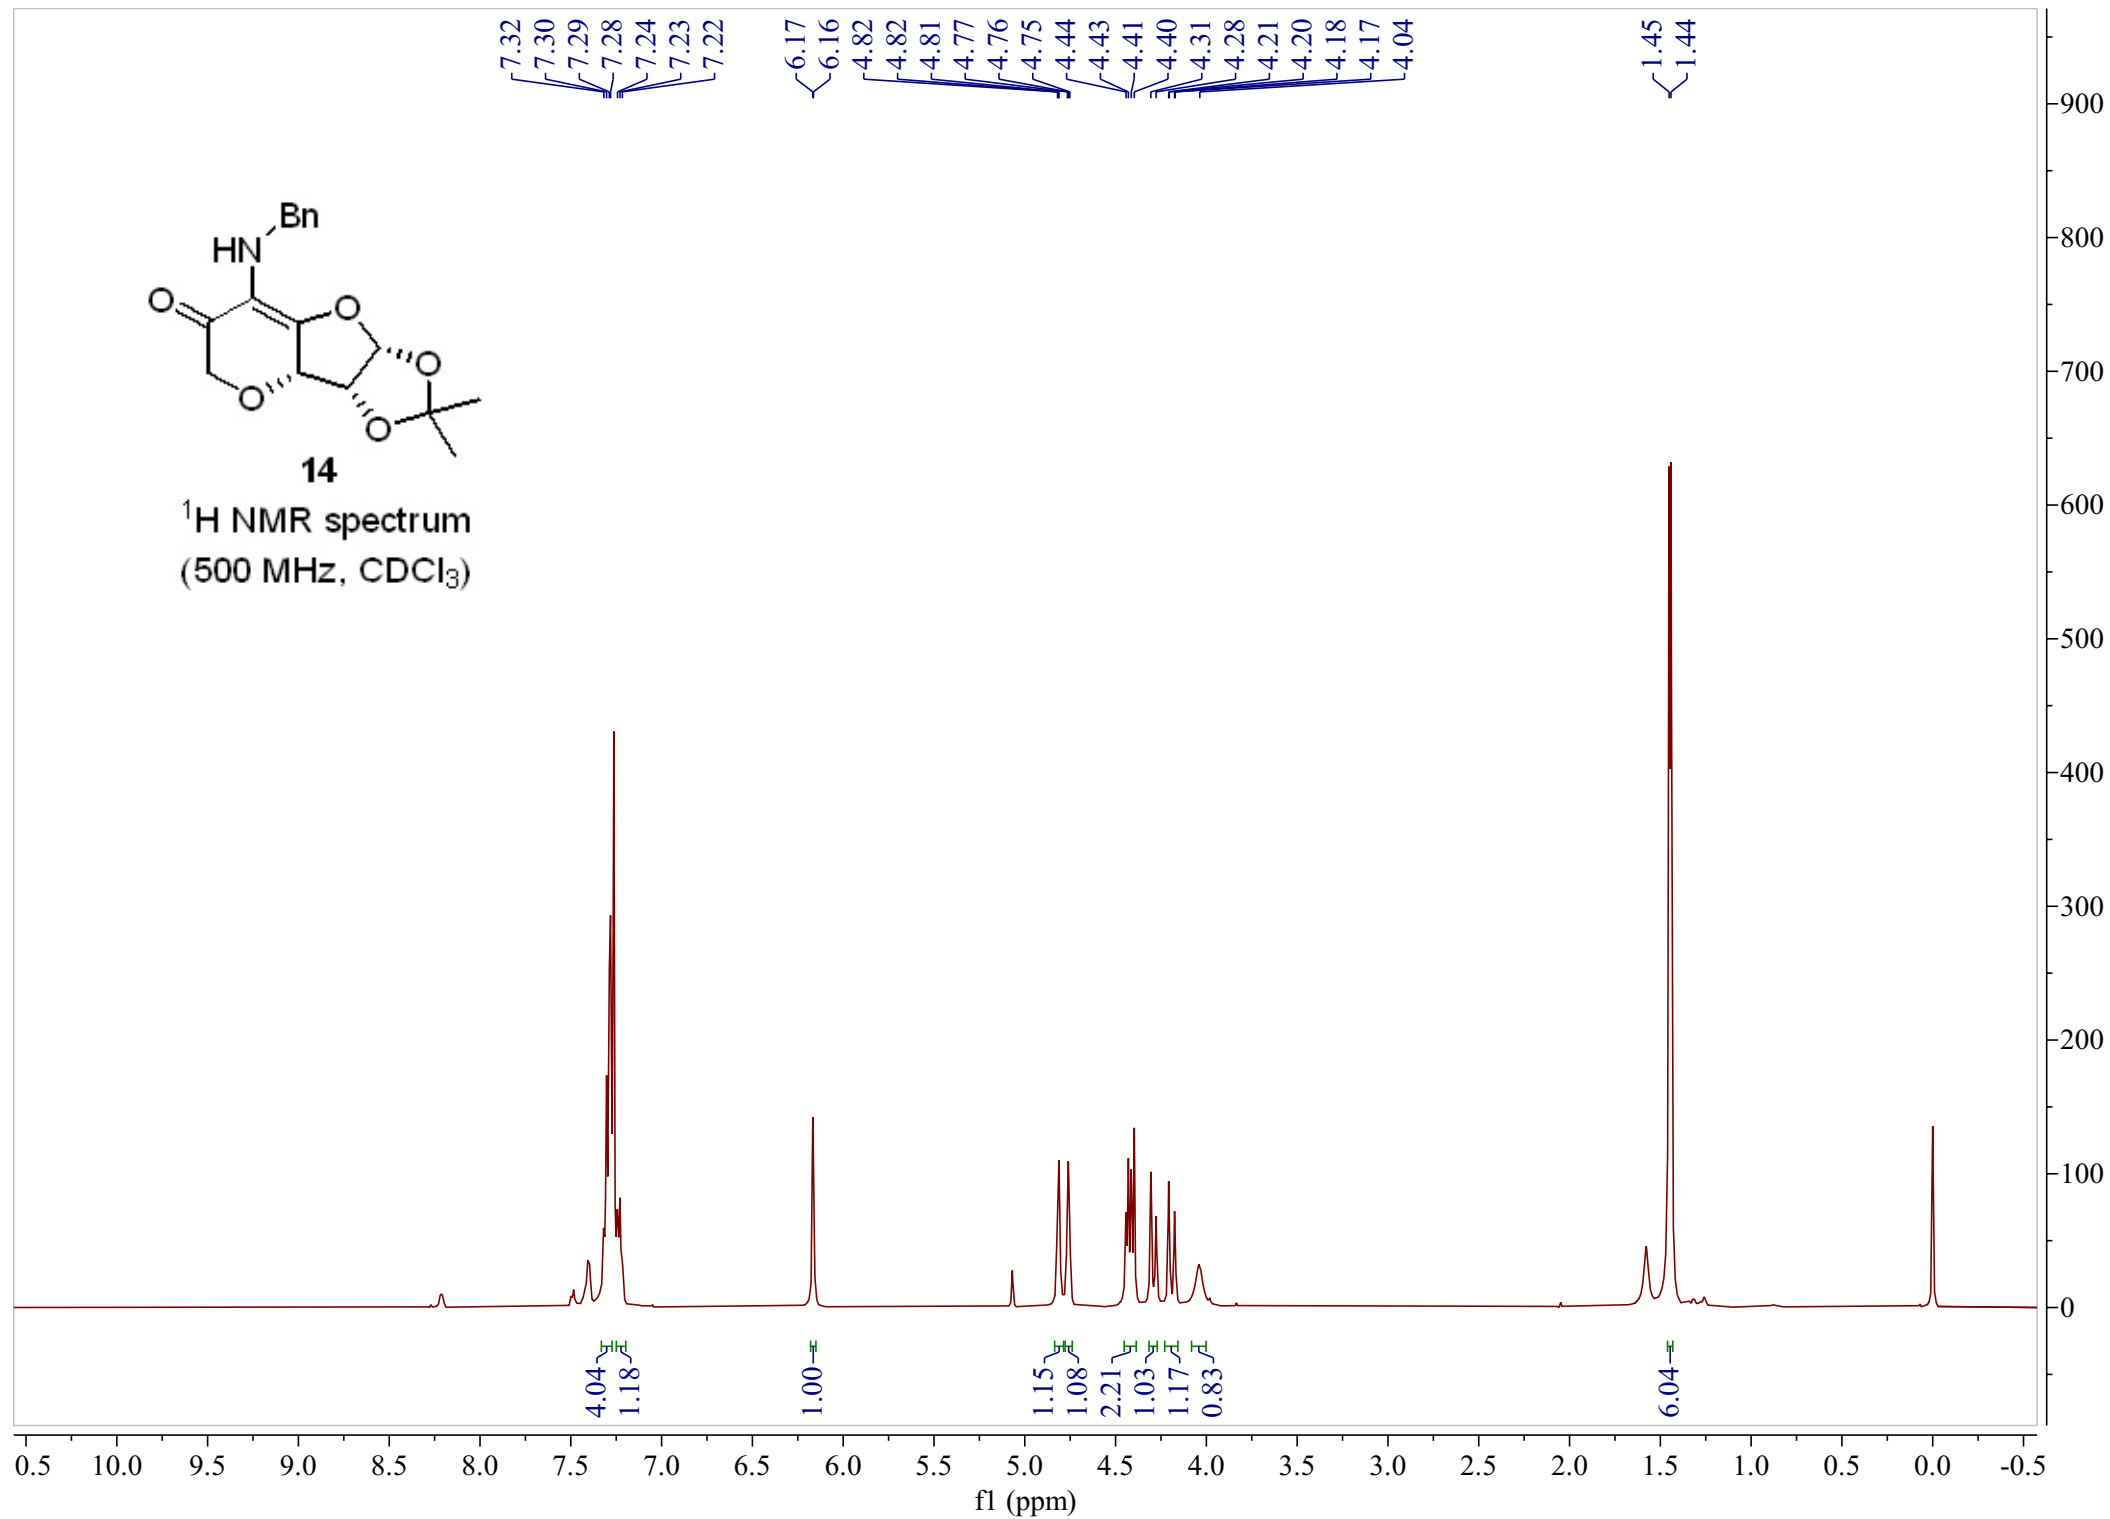

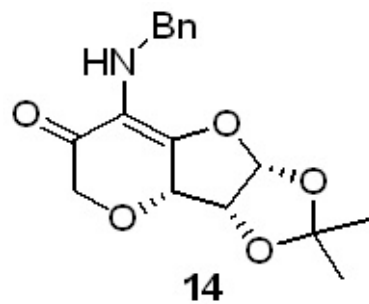

$^{13}\text{C}$  NMR spectrum  
(126 MHz,  $\text{CDCl}_3$ )

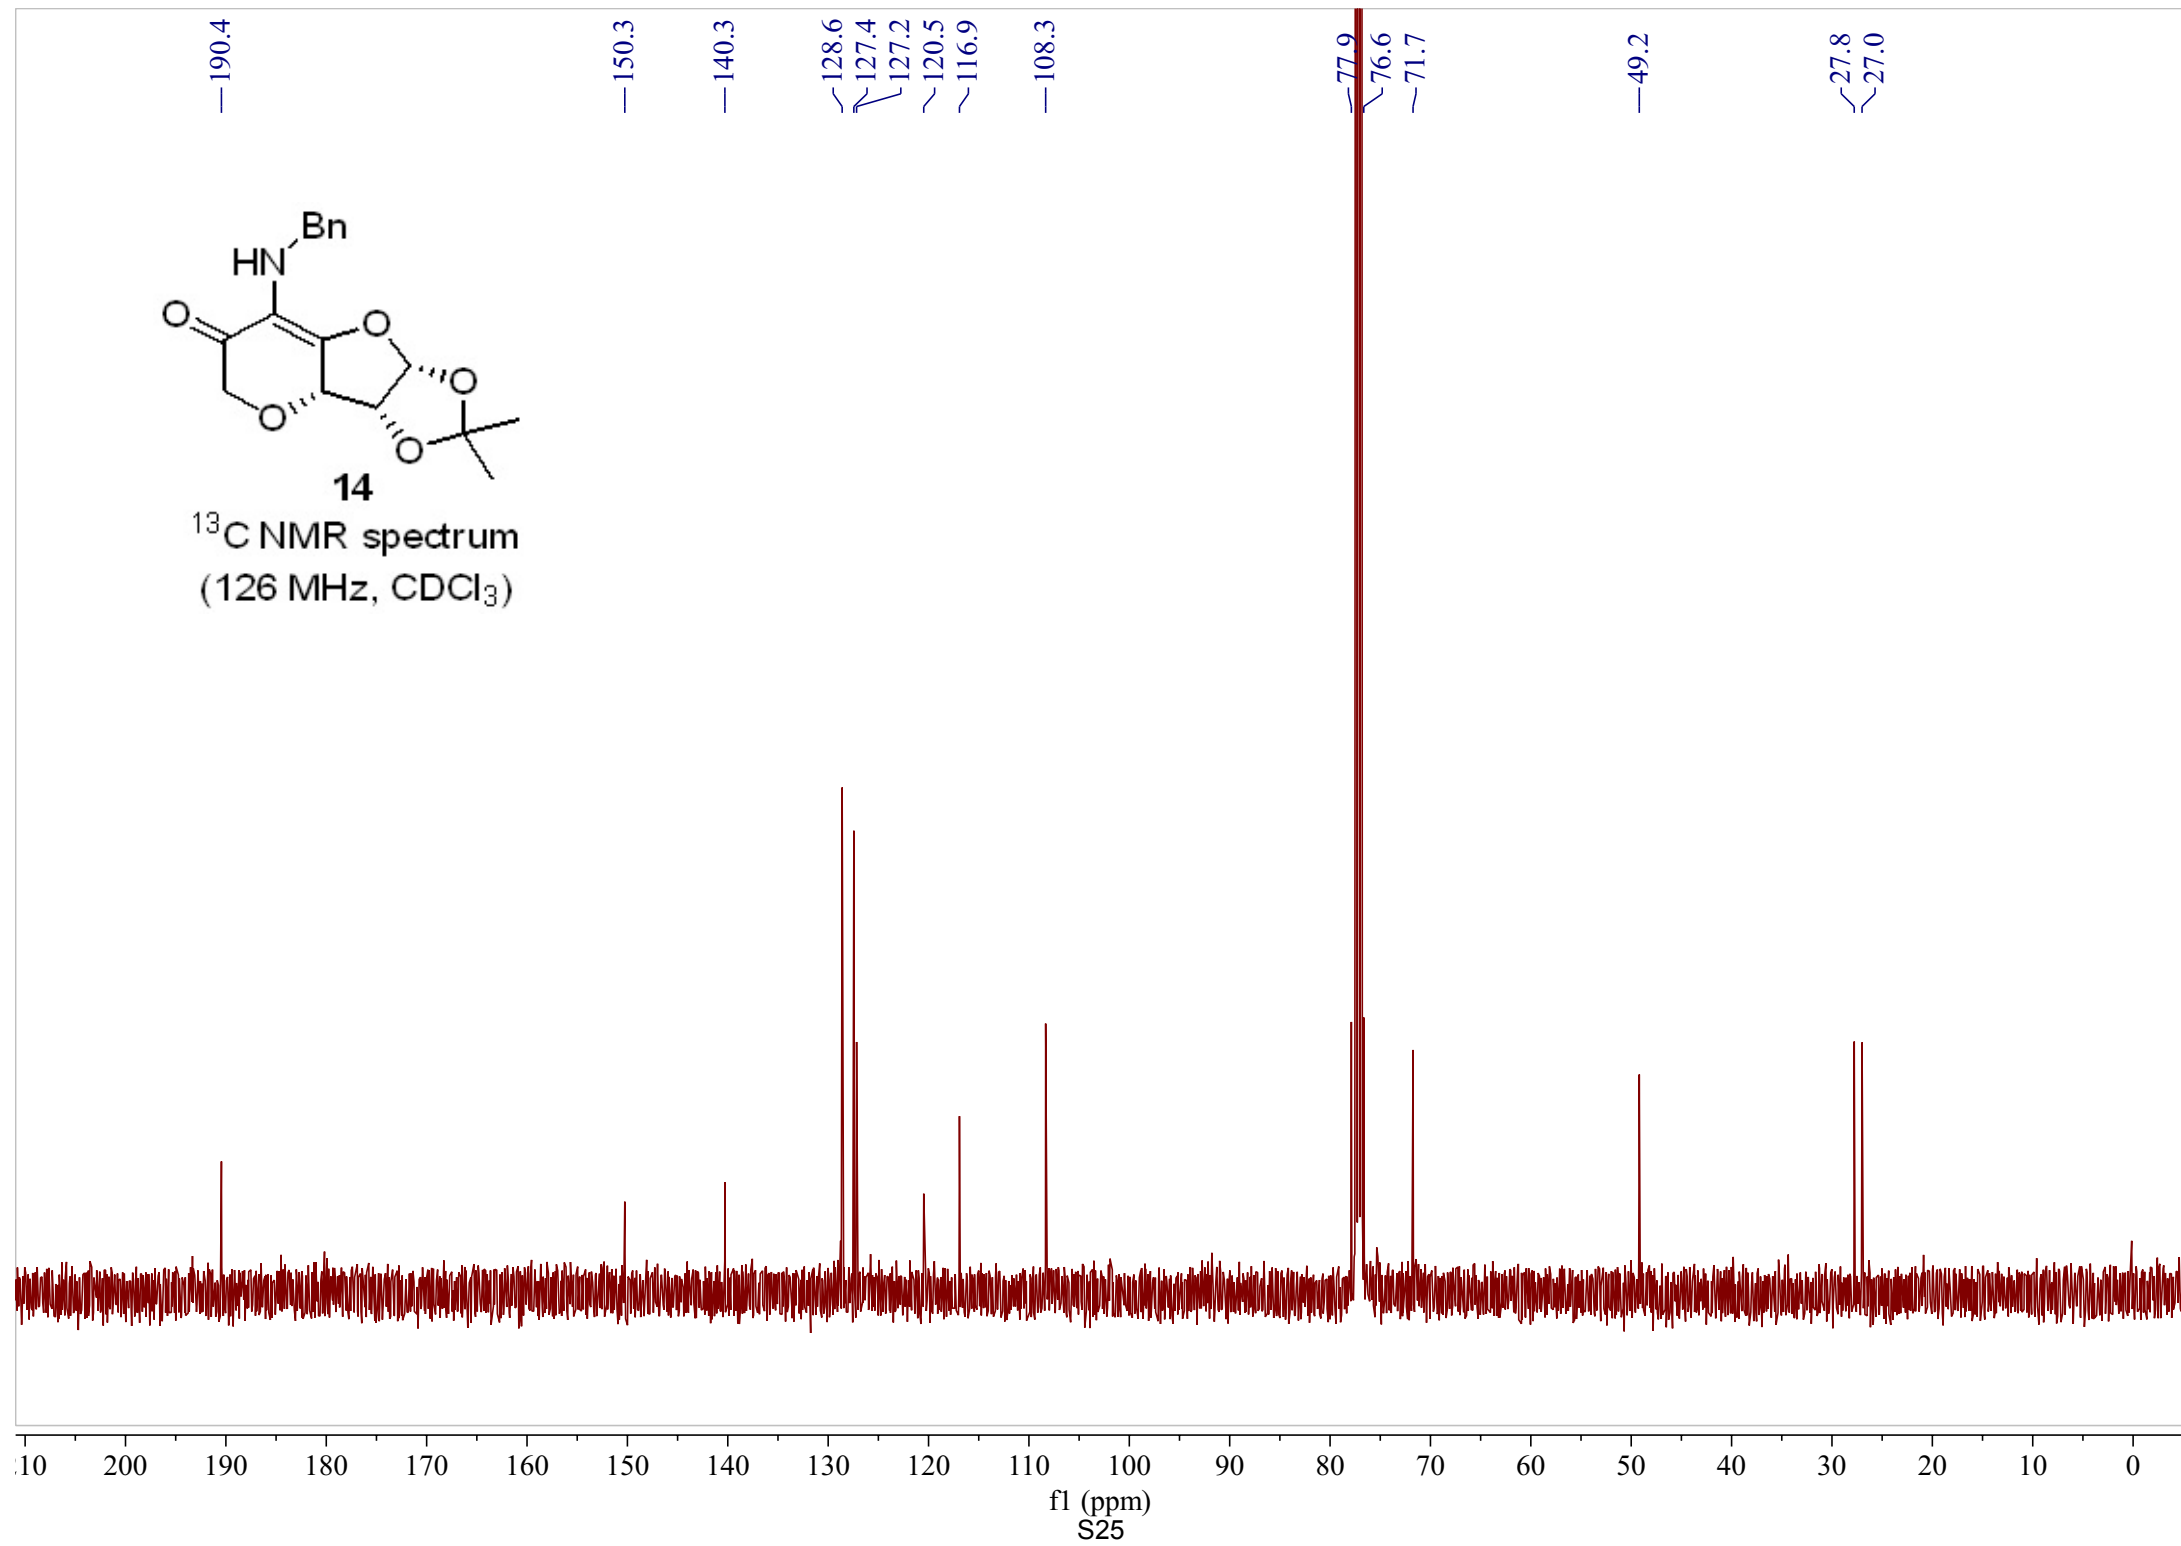

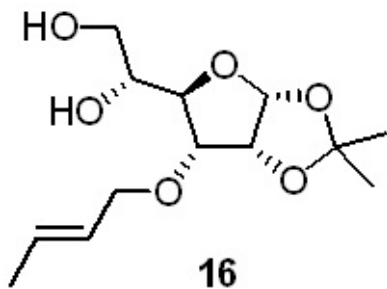

$^1\text{H}$  NMR spectrum  
(400 MHz,  $\text{CDCl}_3$ )

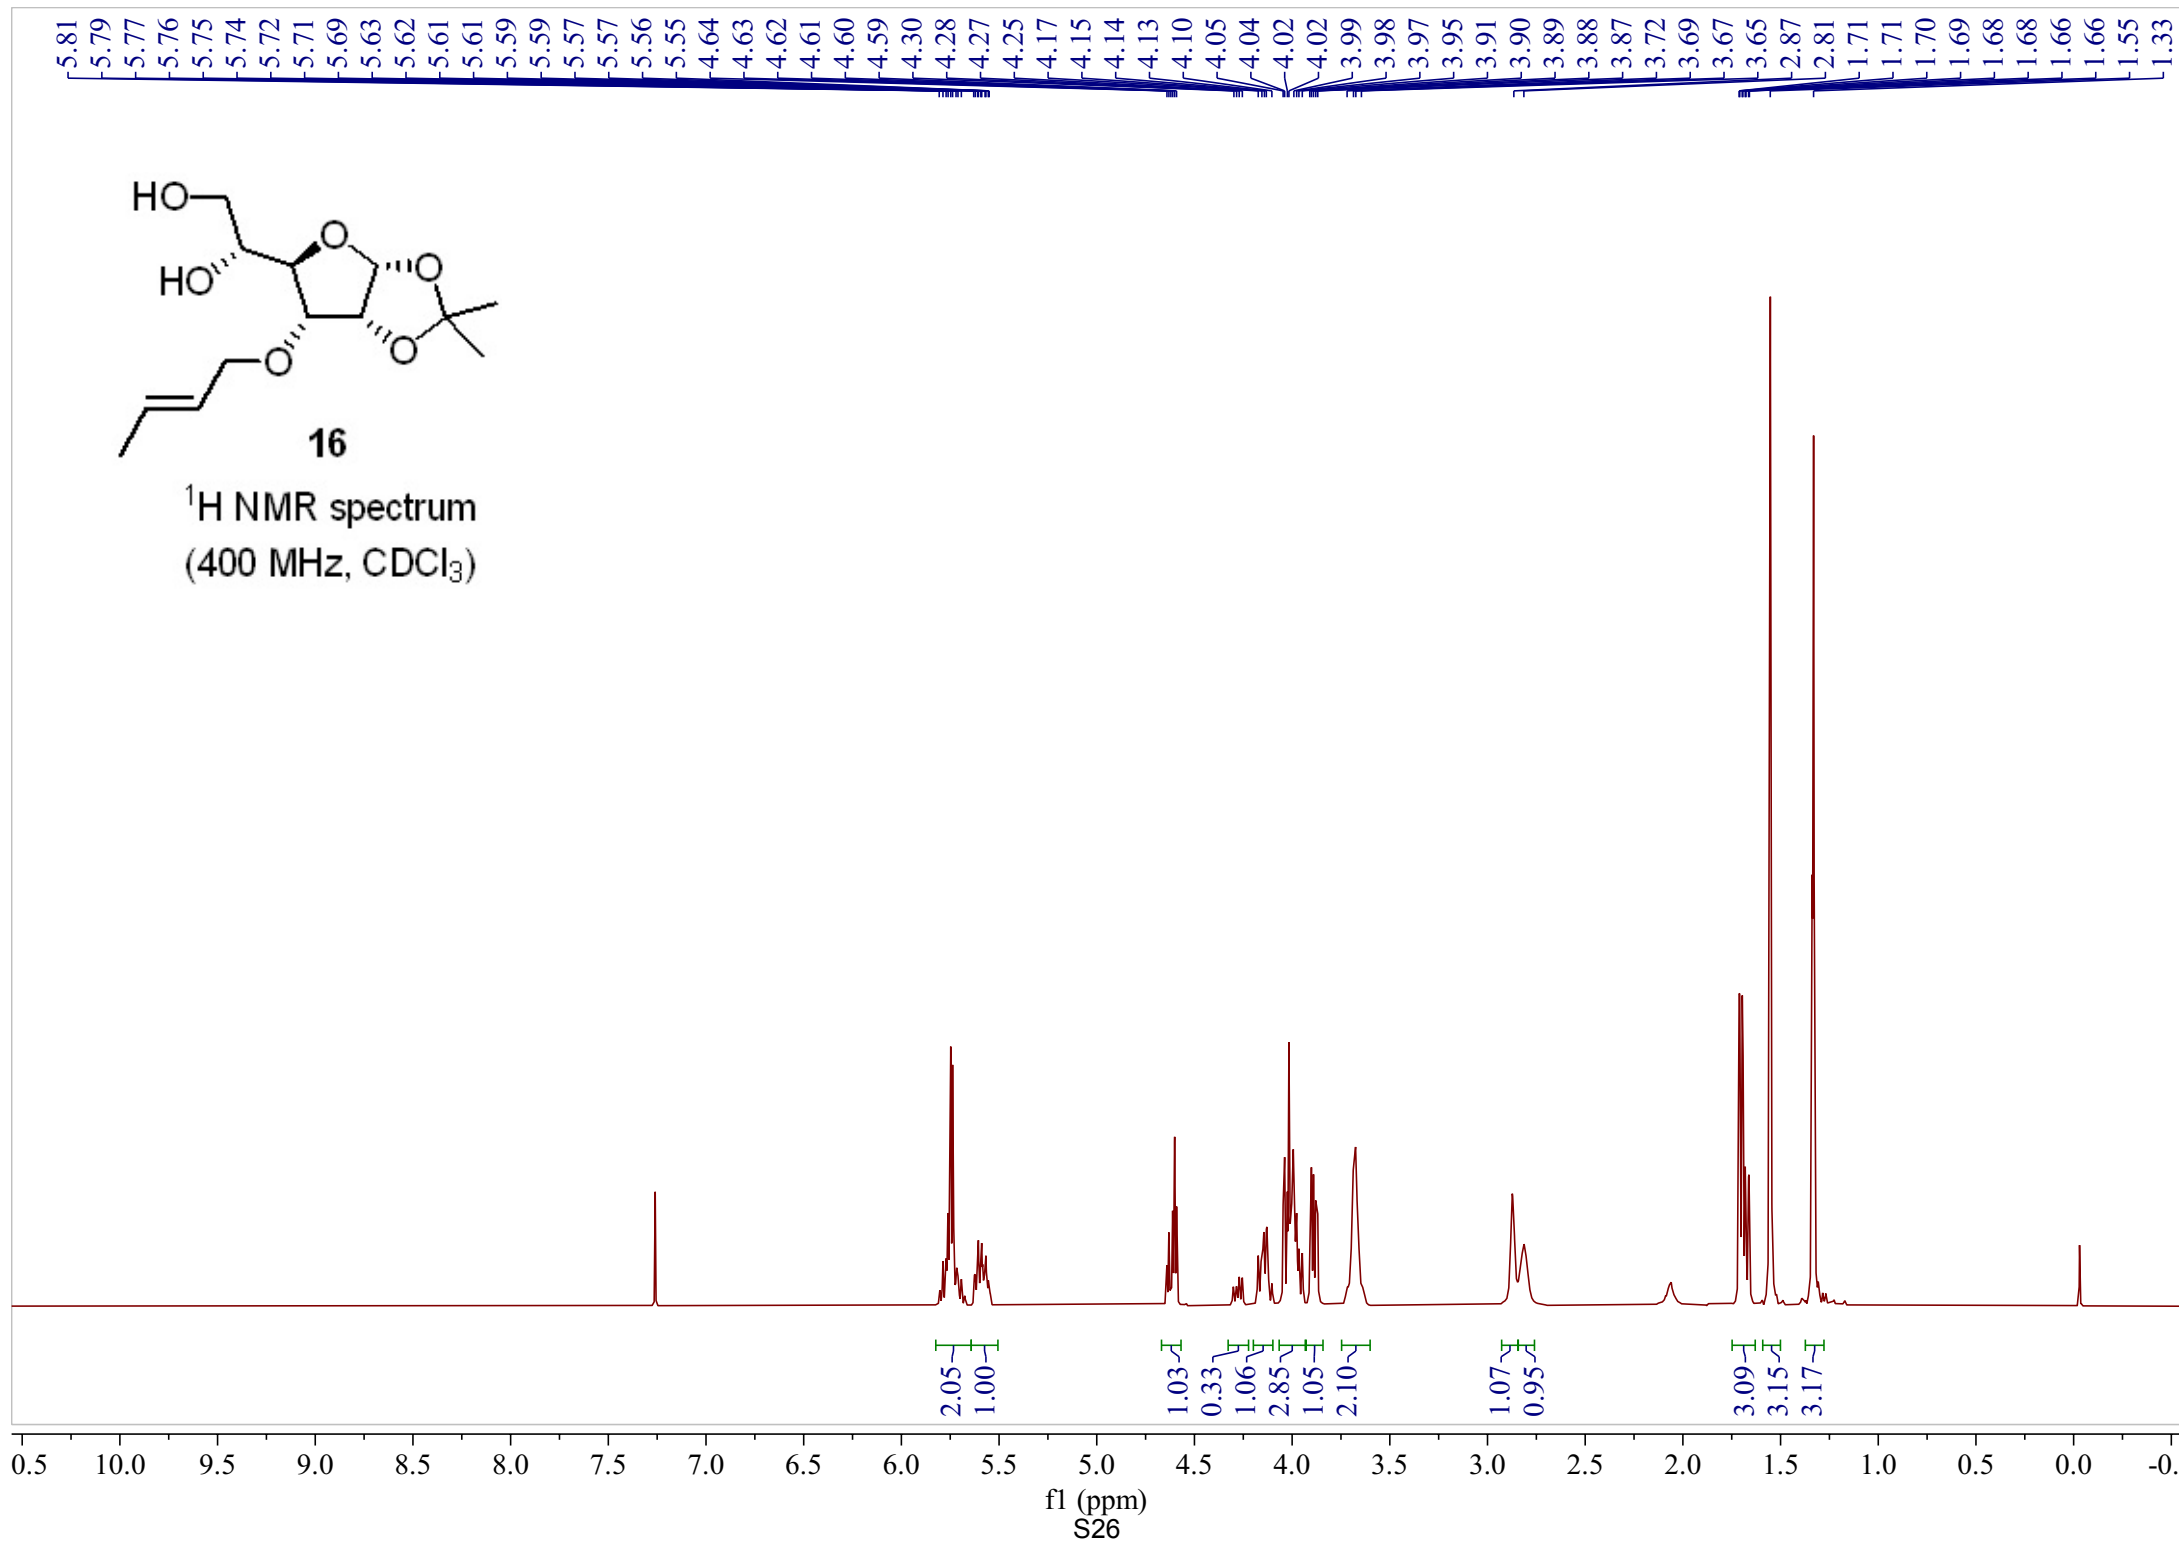

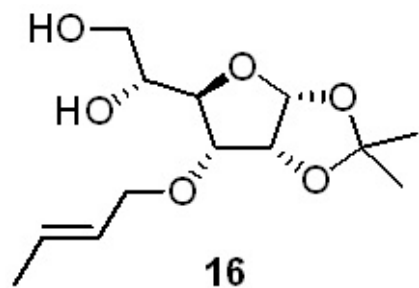

$^{13}\text{C}$  NMR spectrum  
(101 MHz,  $\text{CDCl}_3$ )

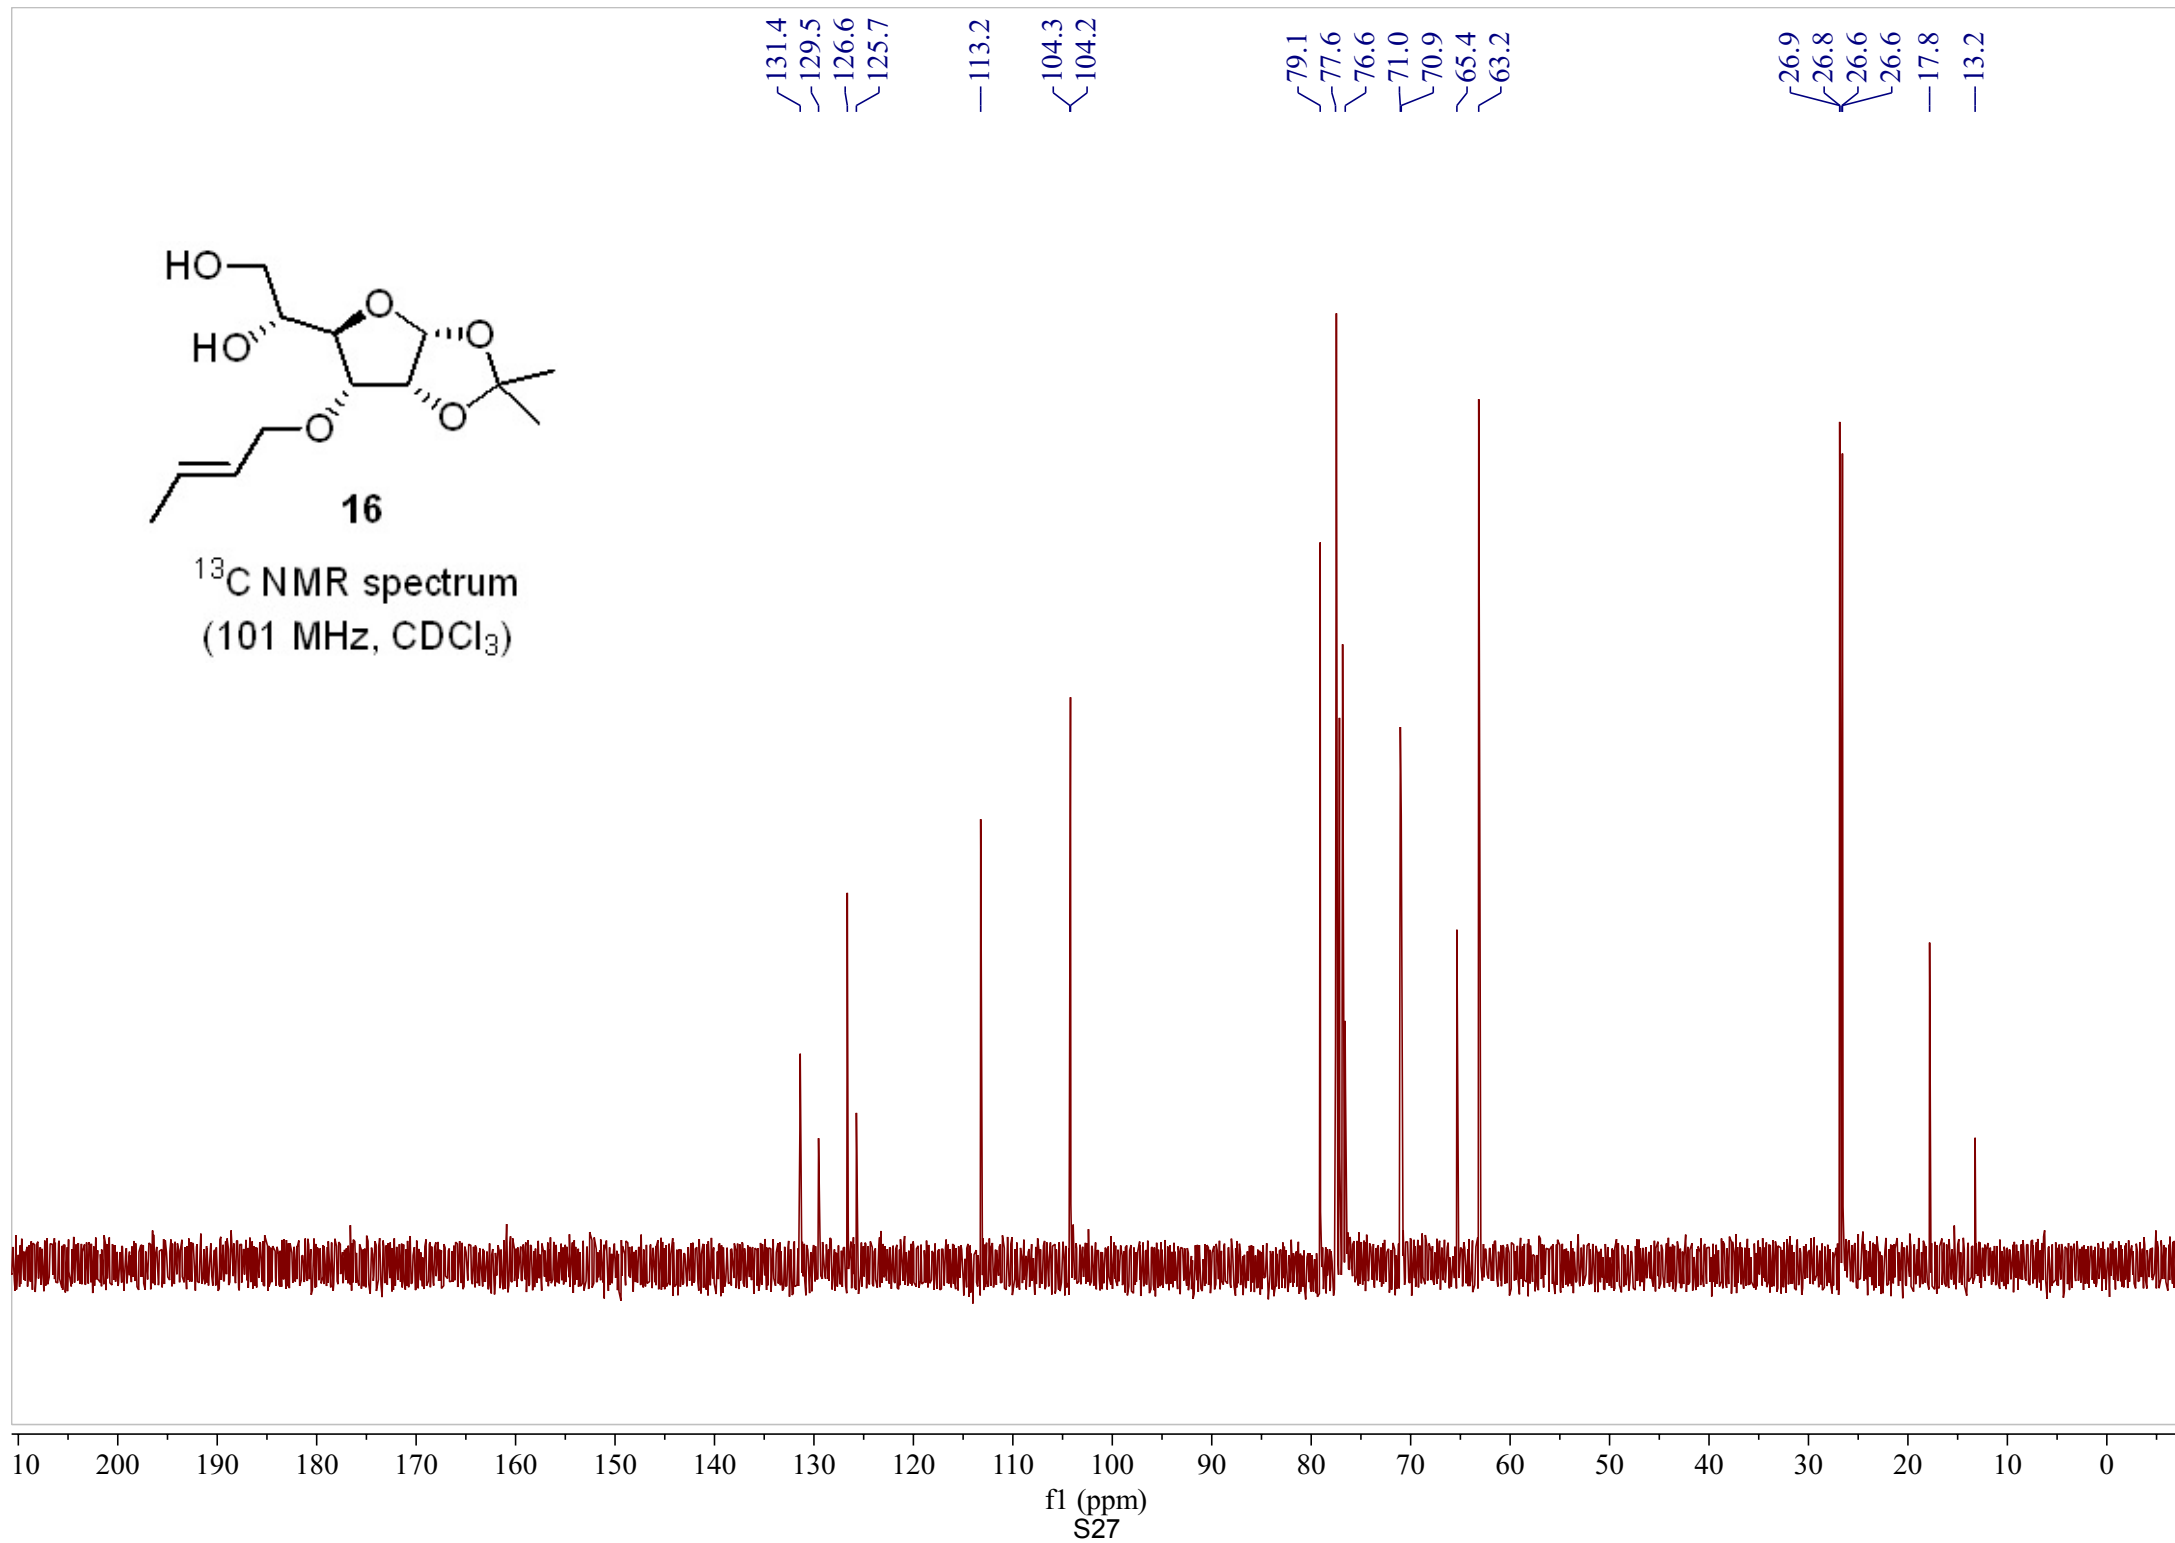

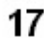<sup>1</sup>H NMR spectrum  
(400 MHz, CDCl<sub>3</sub>)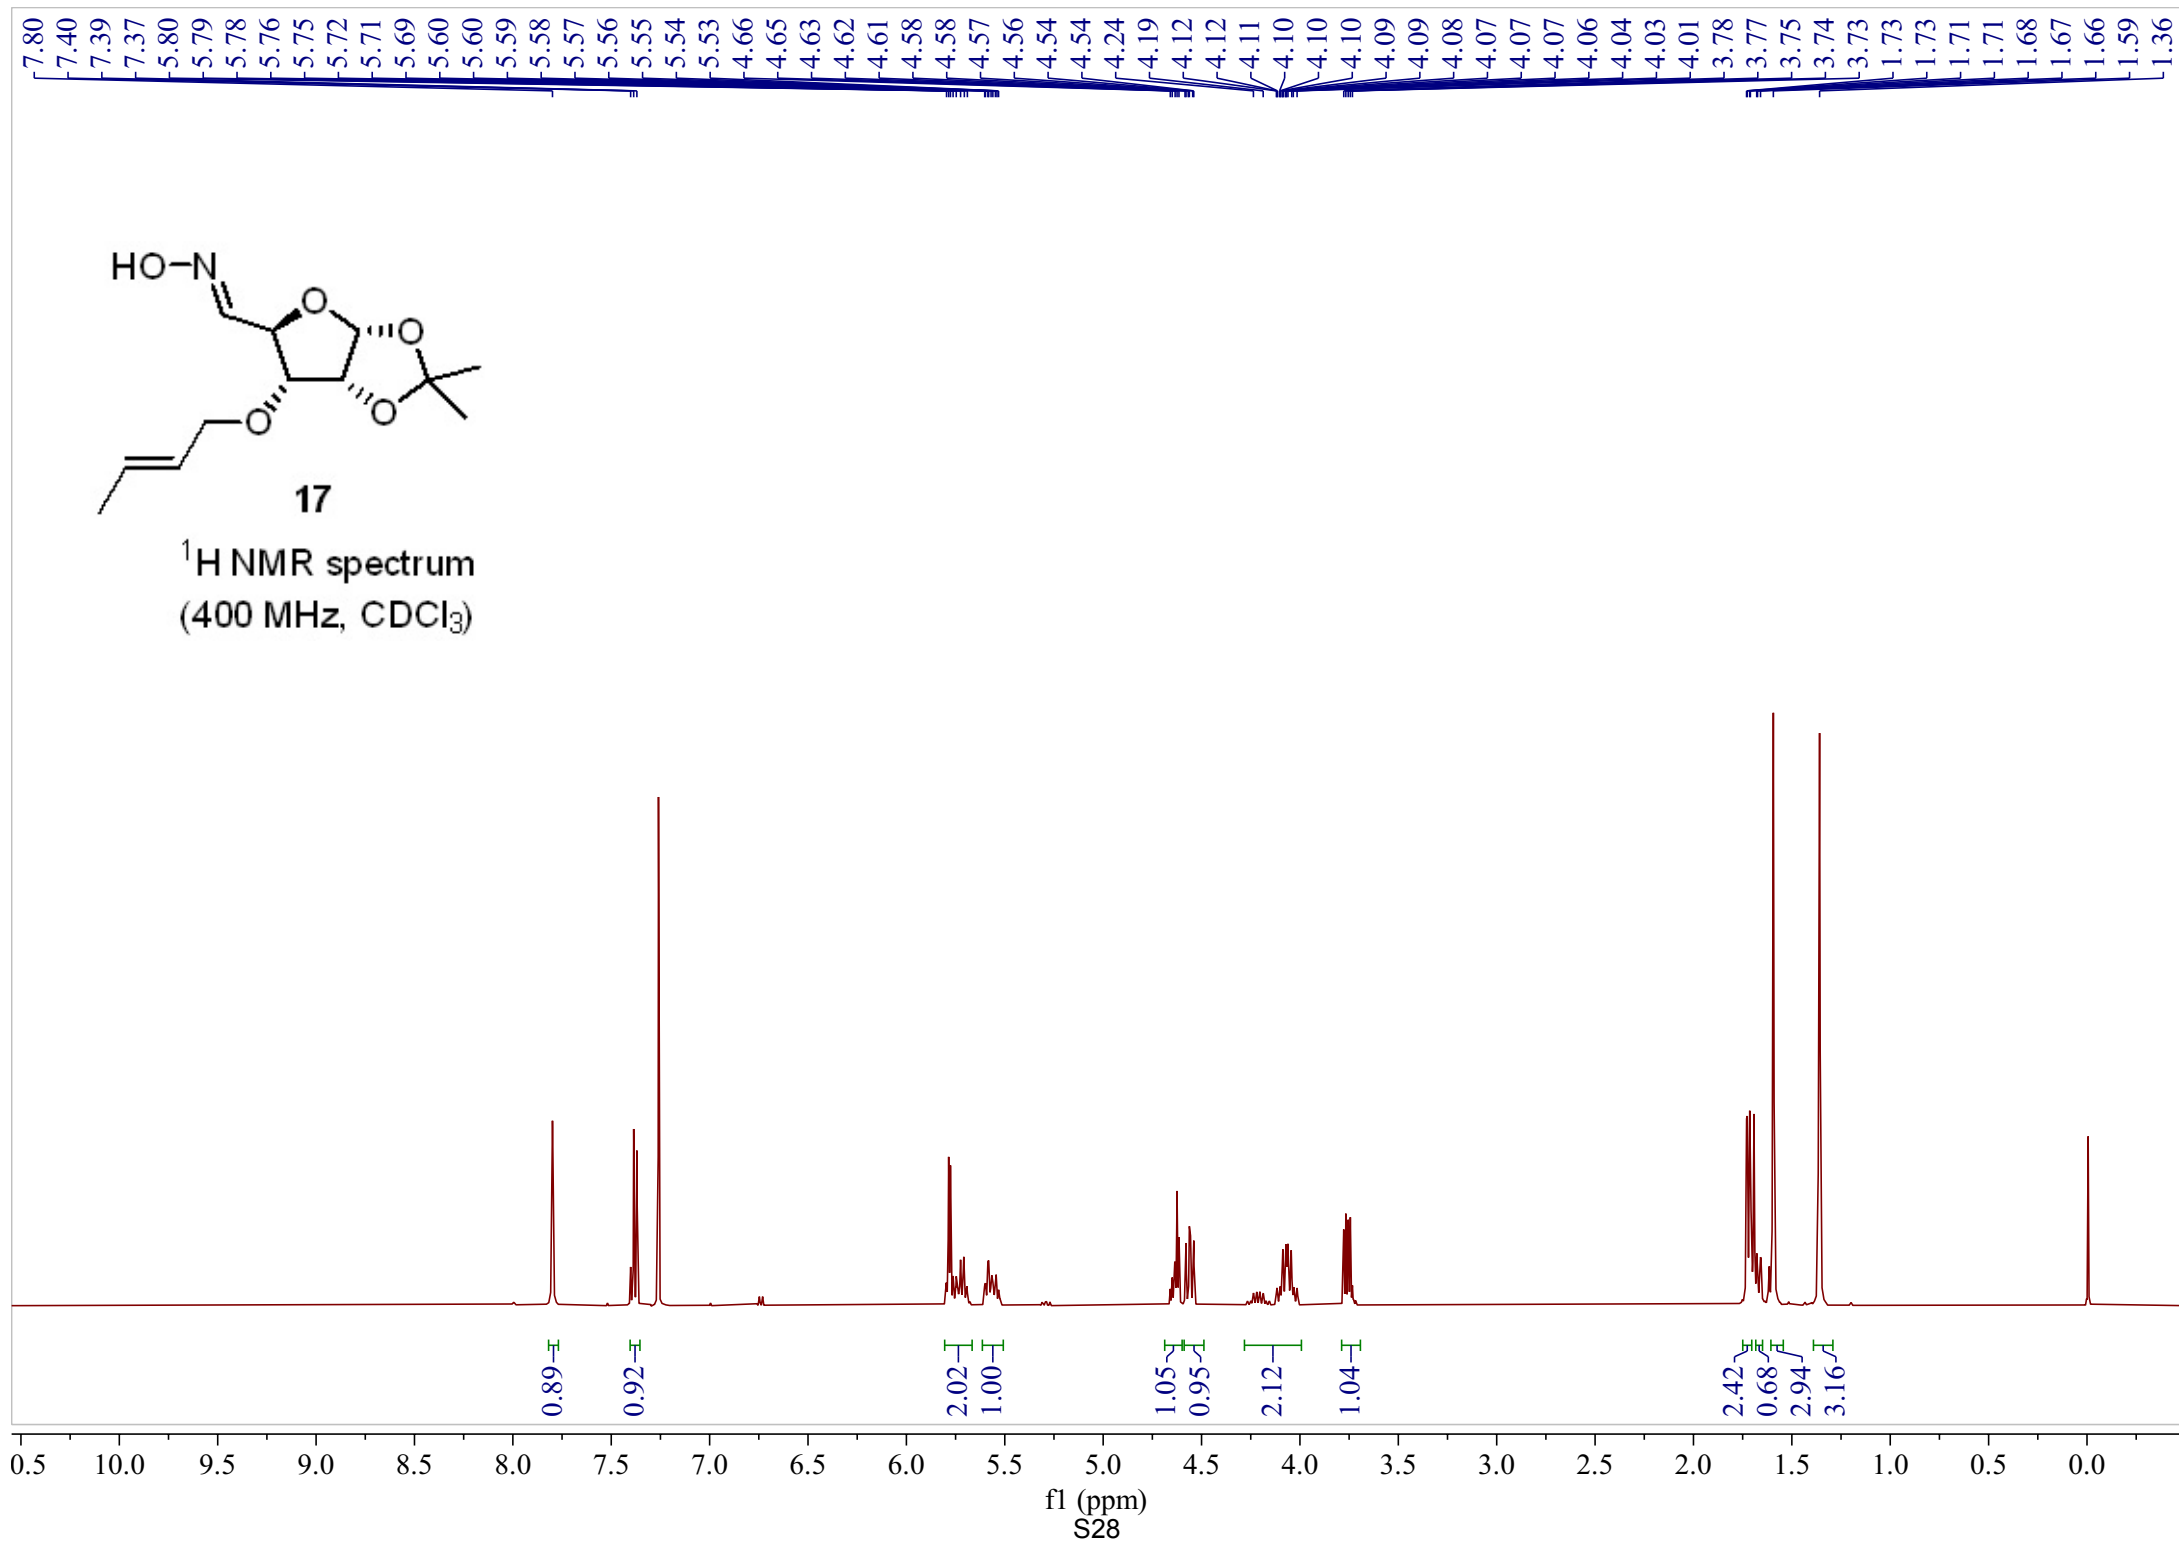

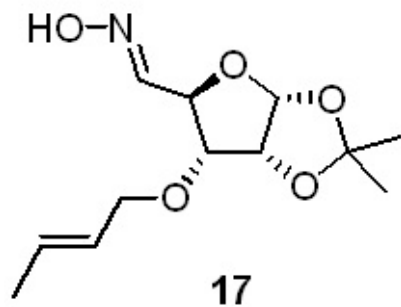

**17**

$^{13}\text{C}$  NMR spectrum  
(101 MHz,  $\text{CDCl}_3$ )

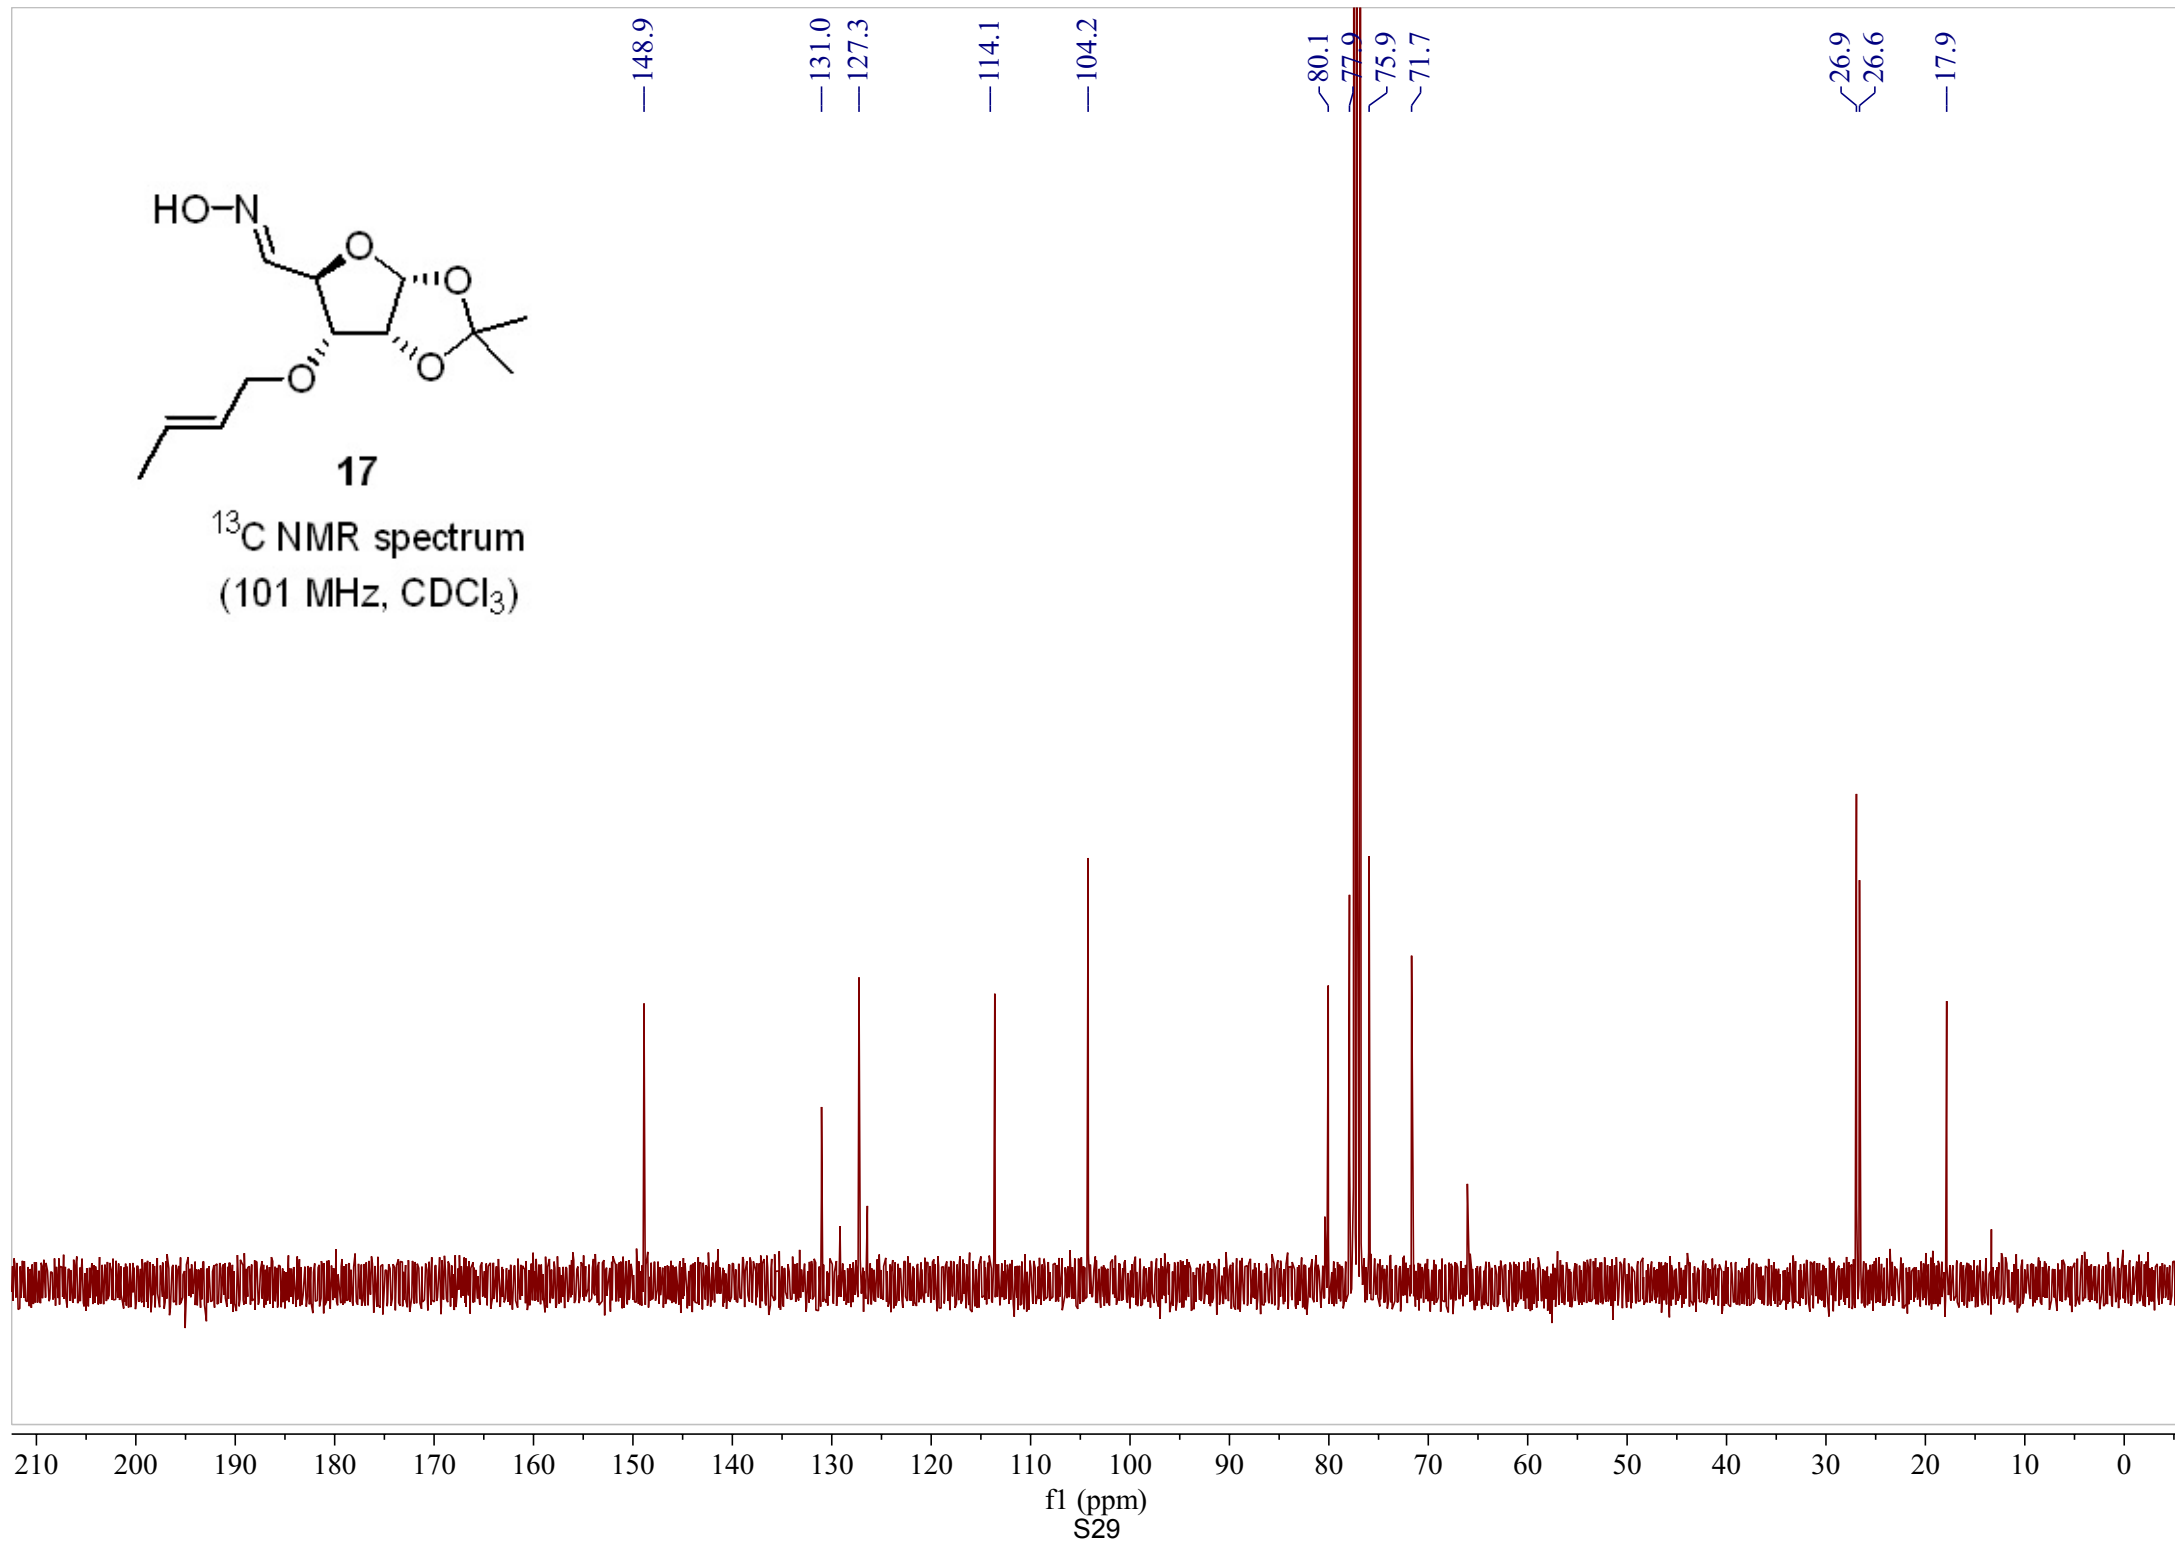

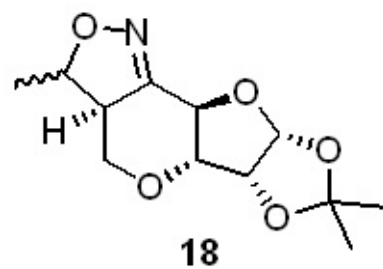

<sup>1</sup>H NMR spectrum  
(400 MHz, CDCl<sub>3</sub>)

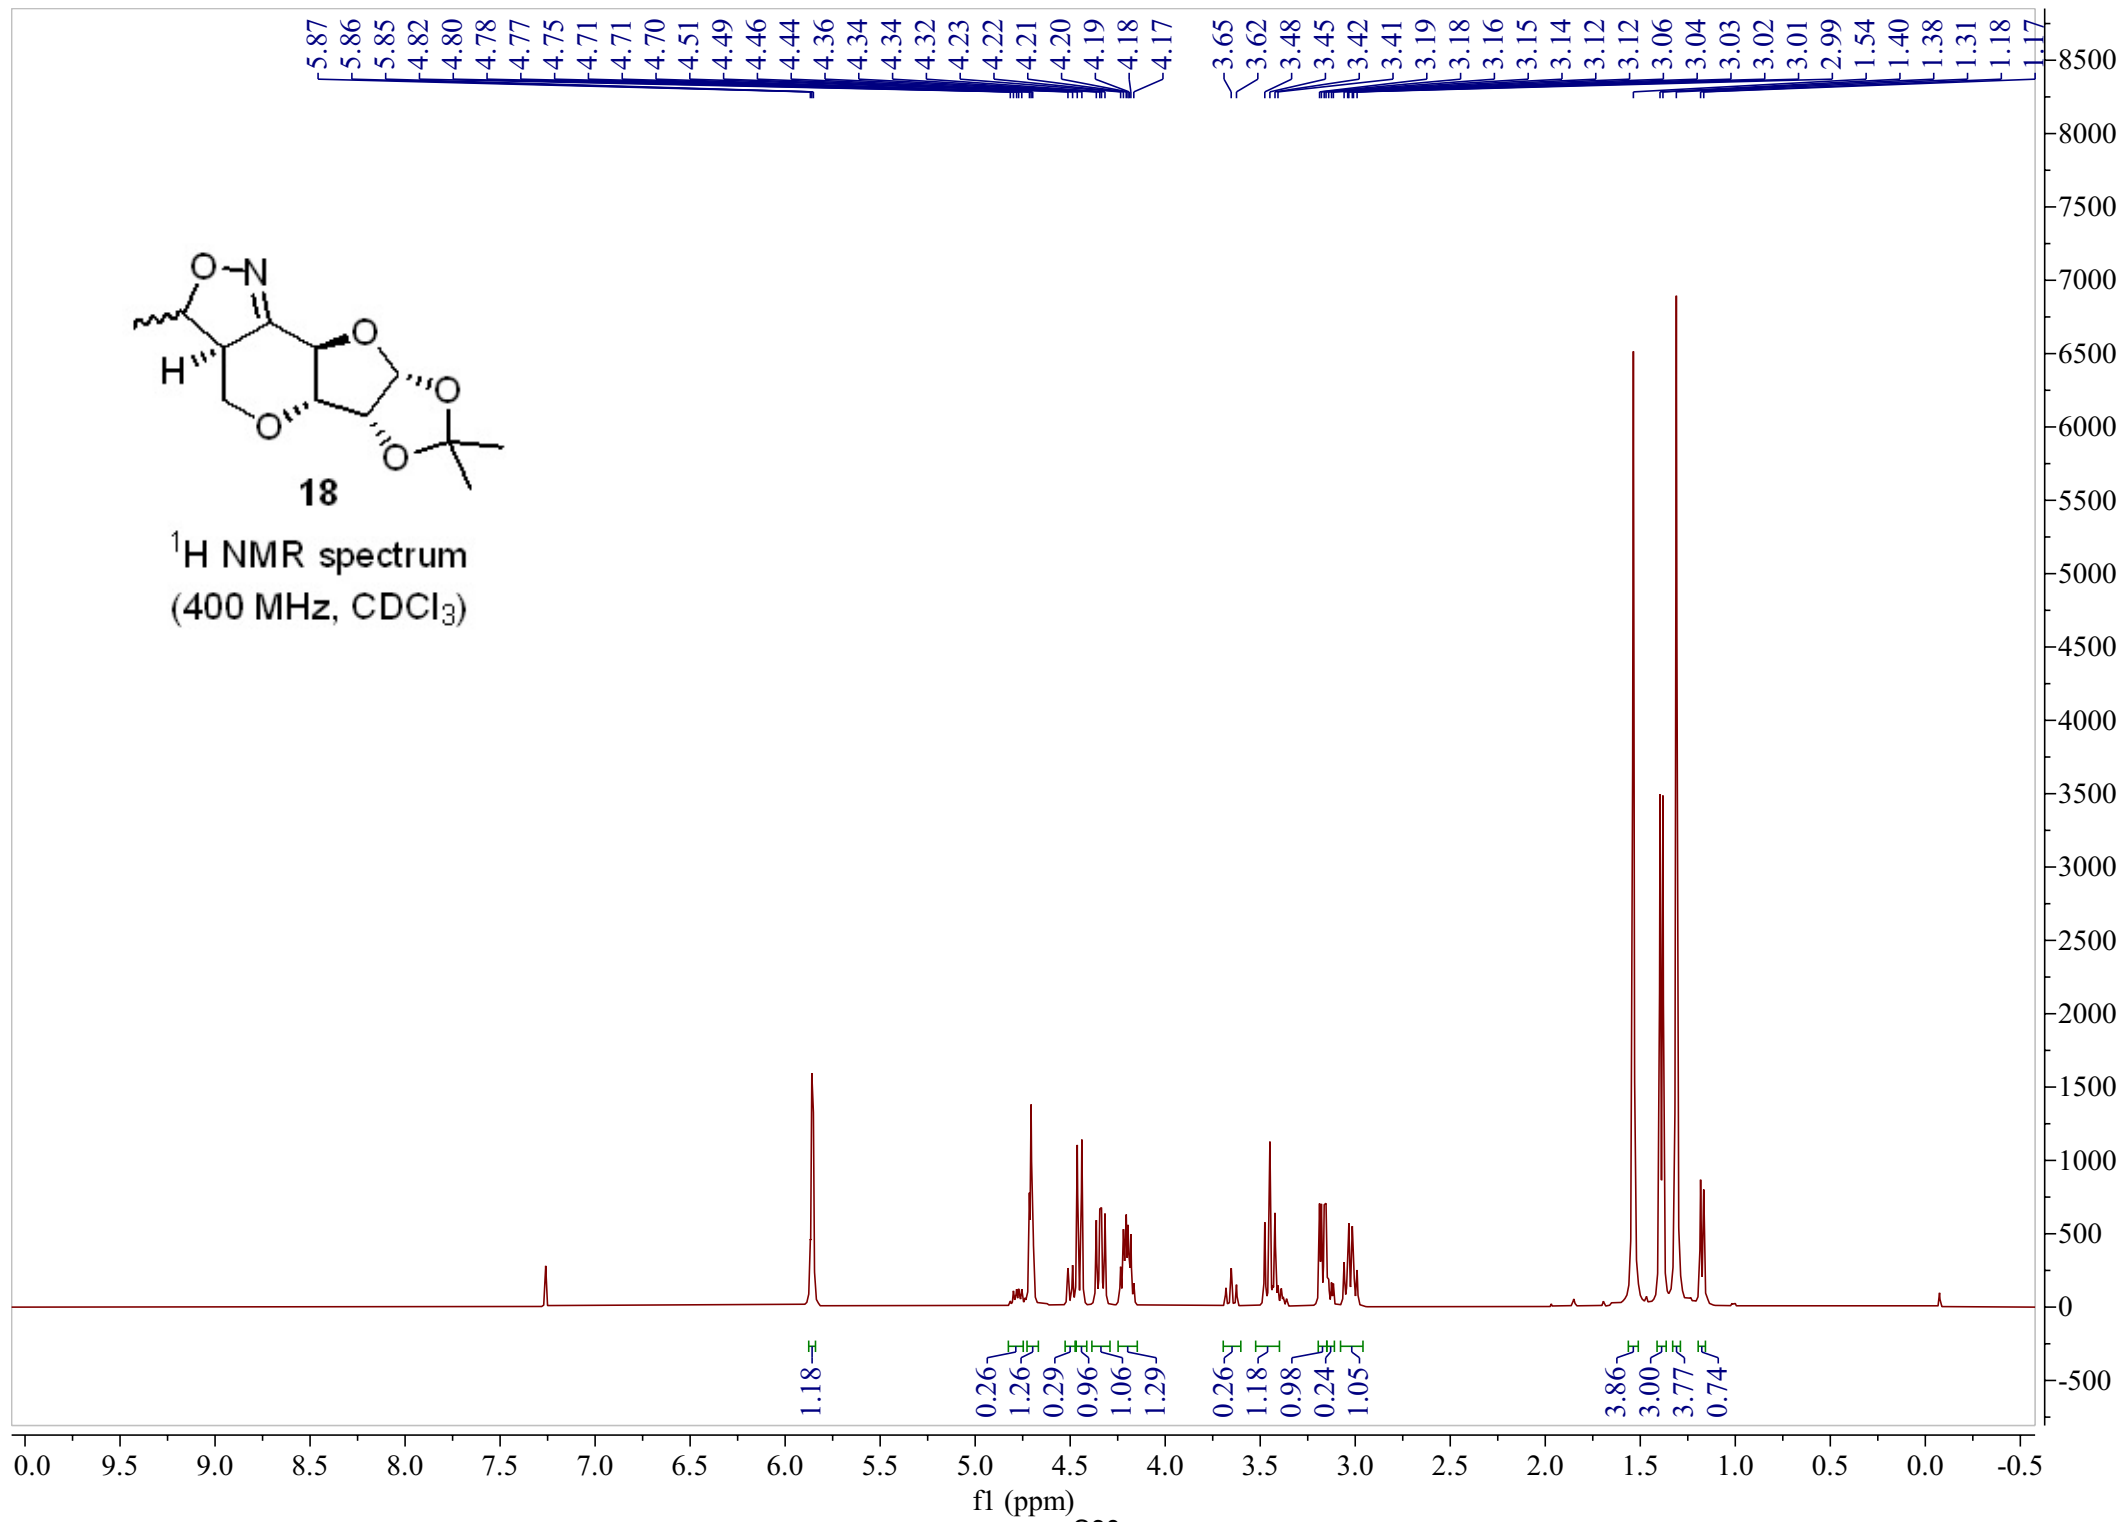

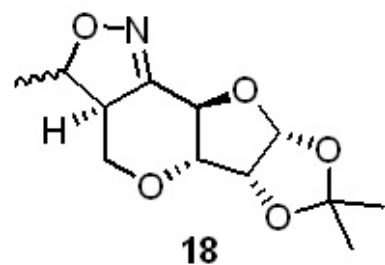

$^{13}\text{C}$  NMR spectrum  
(101 MHz,  $\text{CDCl}_3$ )

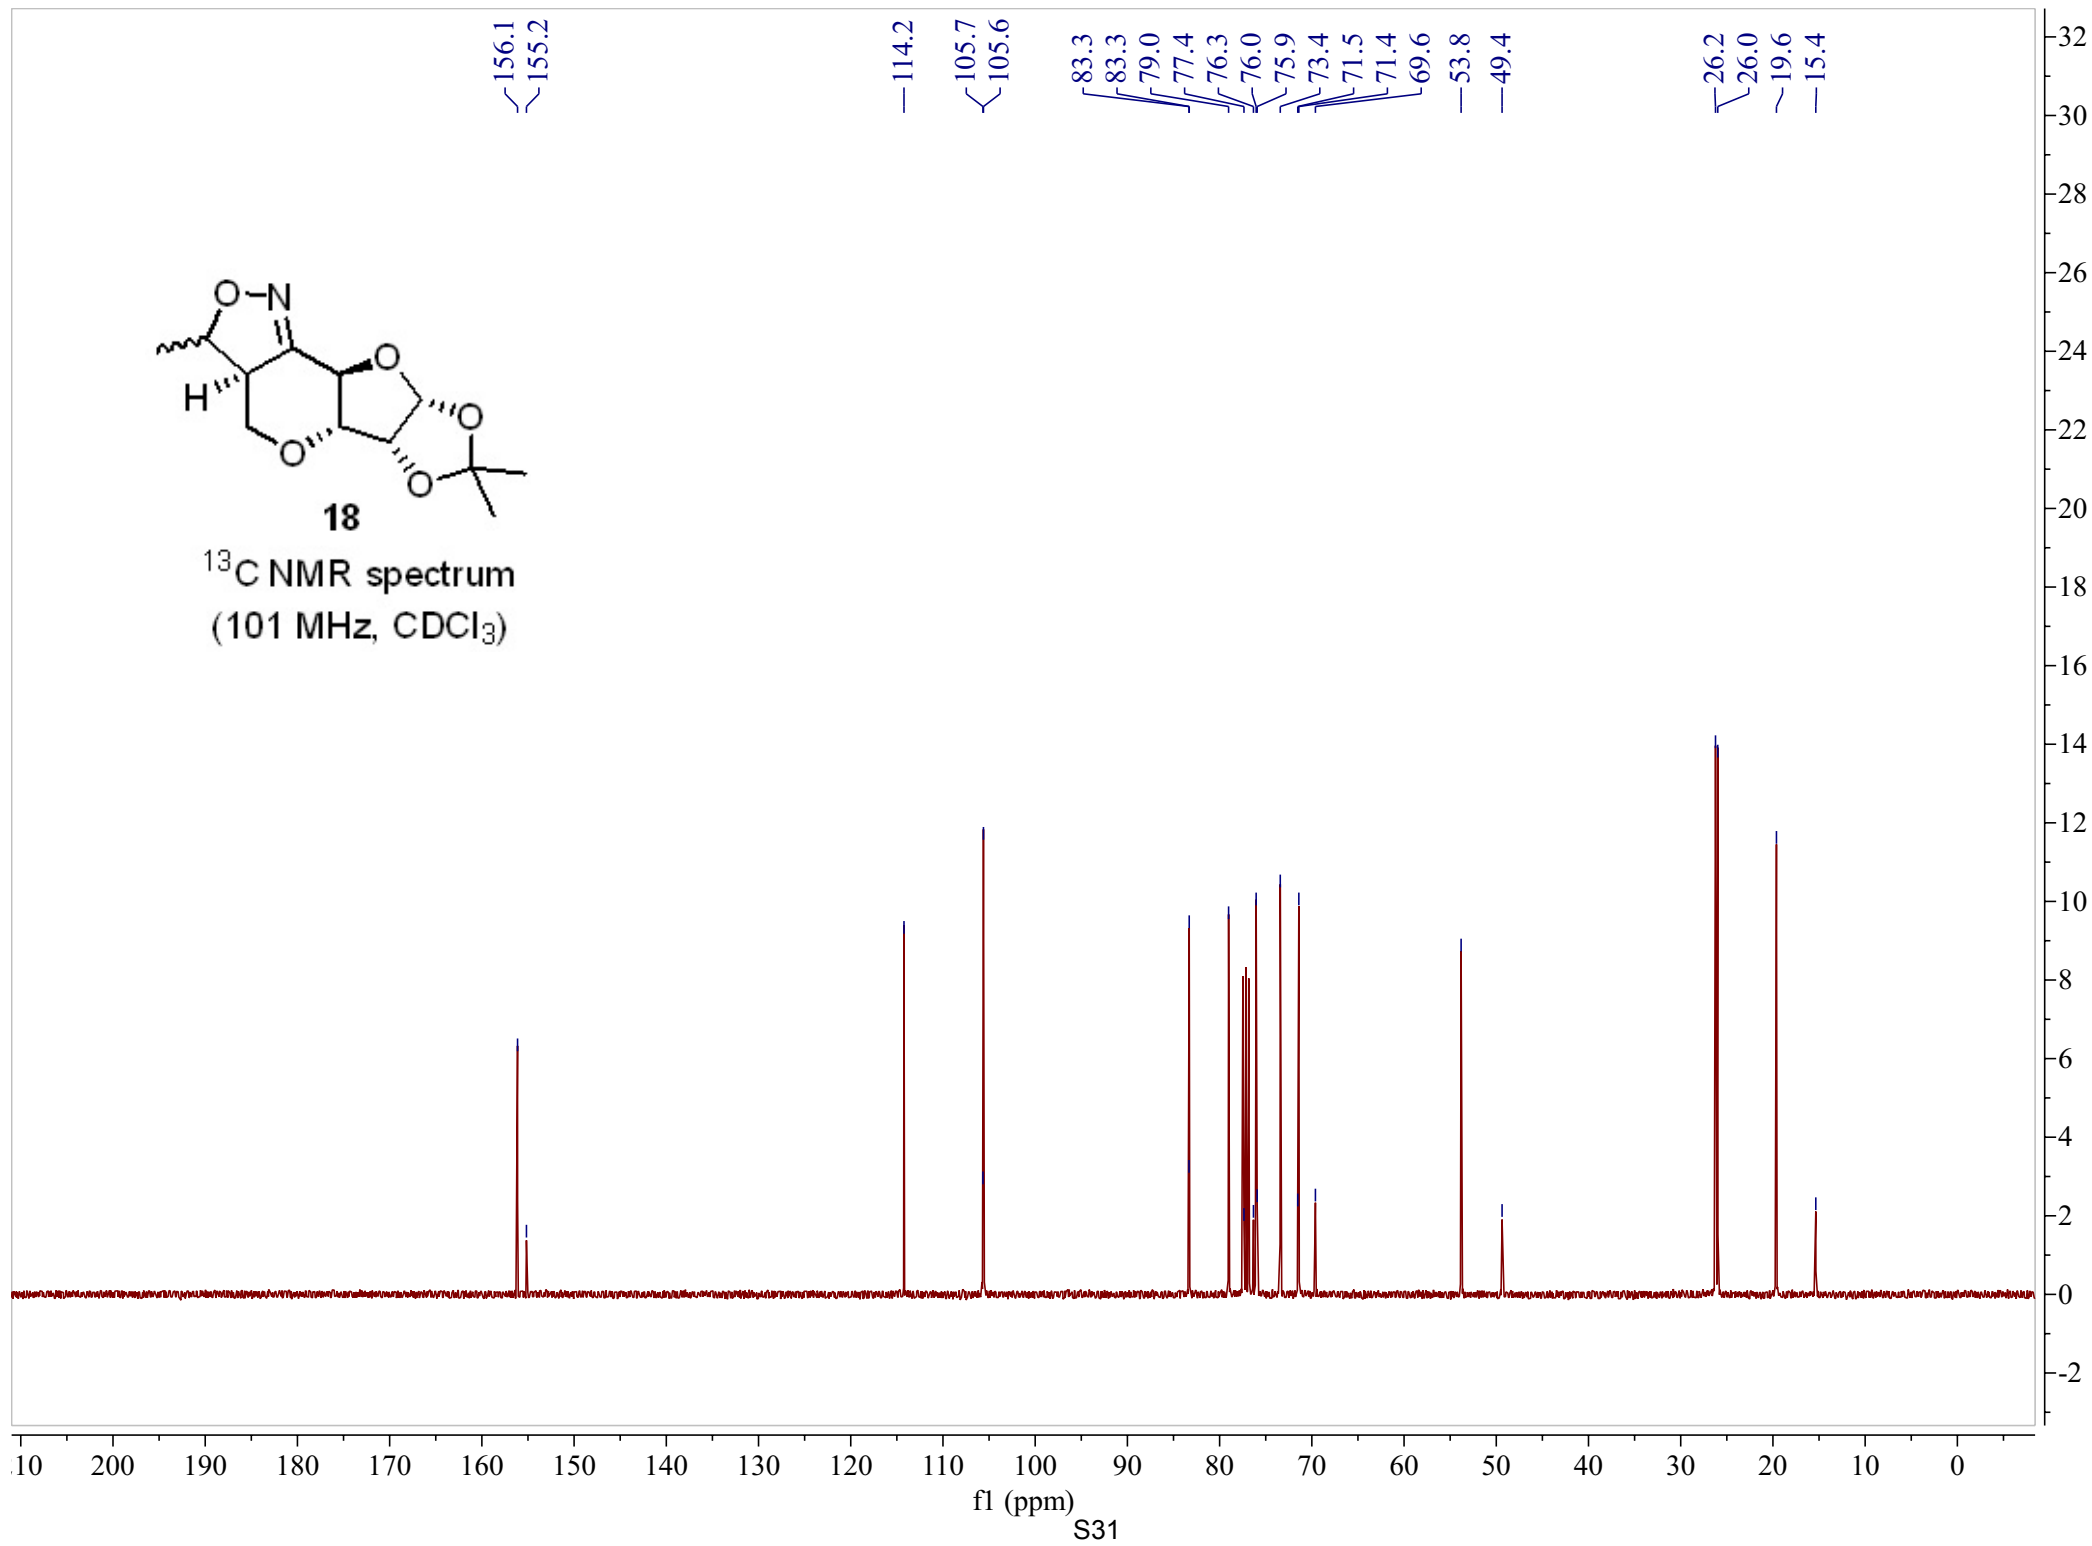

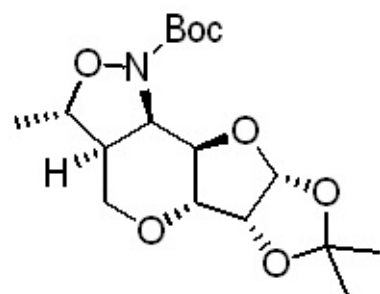

**19a**  
 $^1\text{H}$  NMR spectrum  
 (600 MHz,  $\text{CDCl}_3$ )

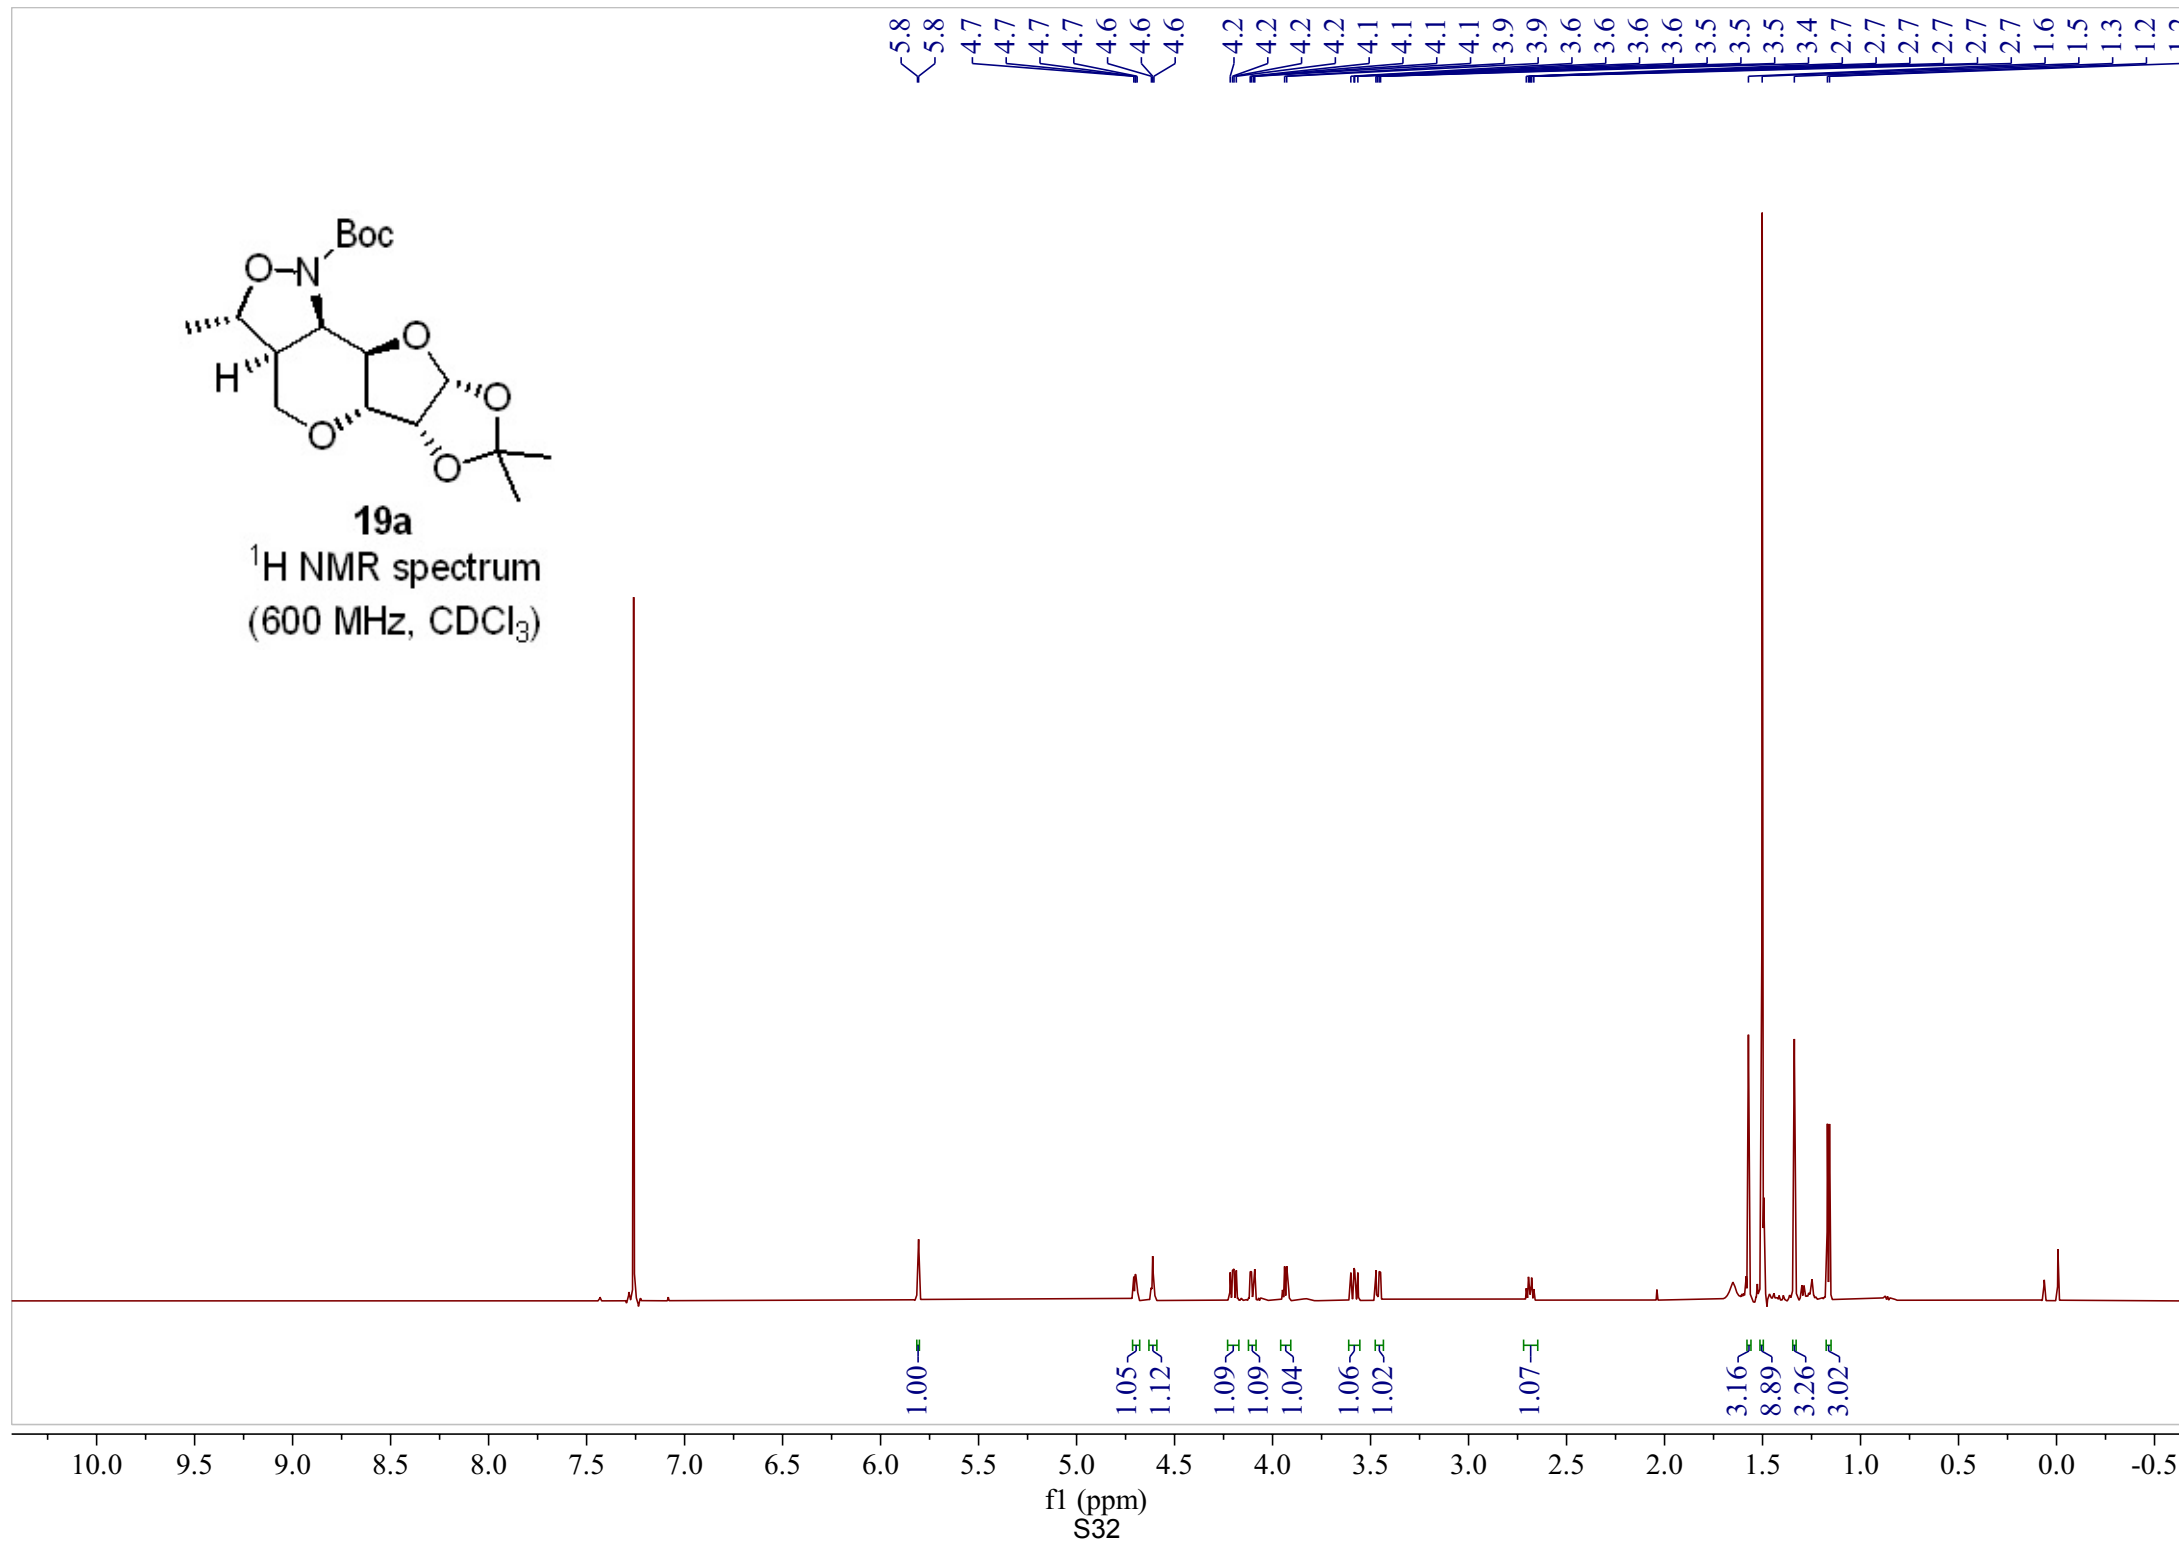

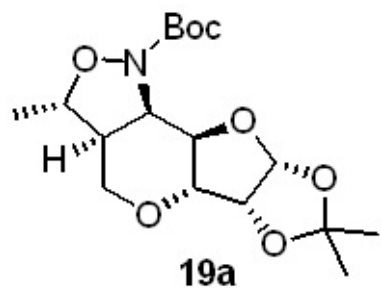

$^{13}\text{C}$  NMR spectrum  
(151 MHz,  $\text{CDCl}_3$ )

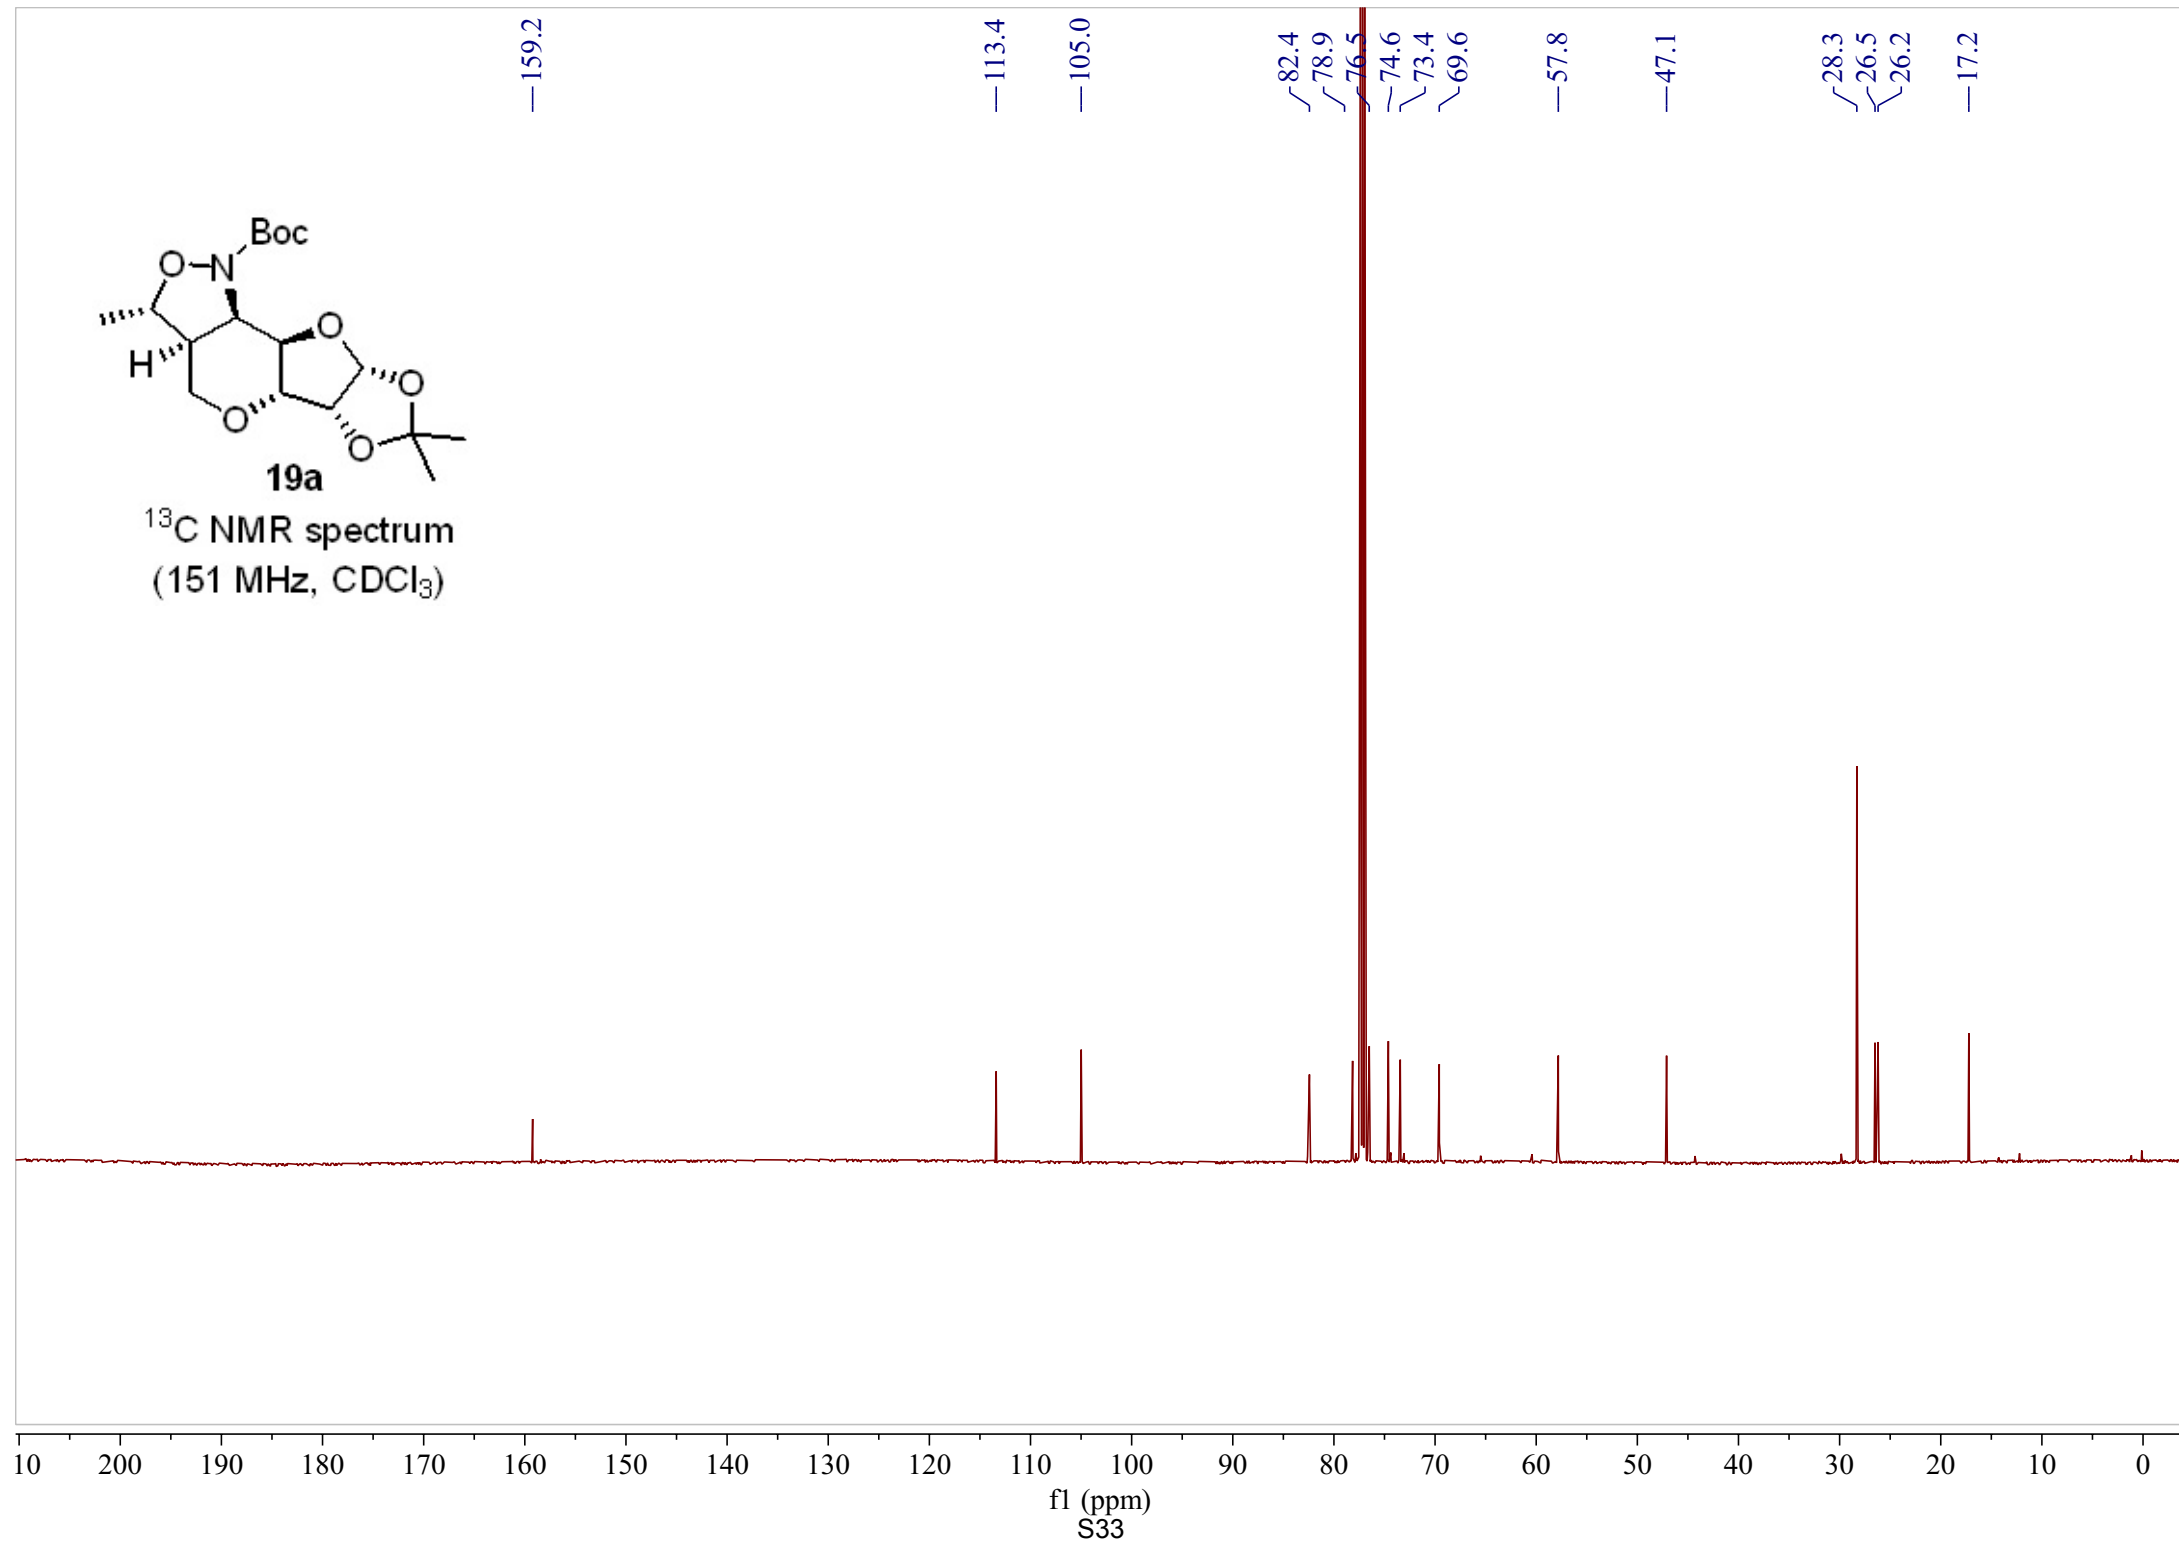

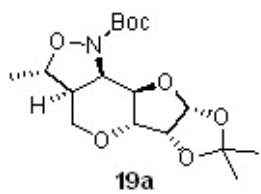

**COSY**

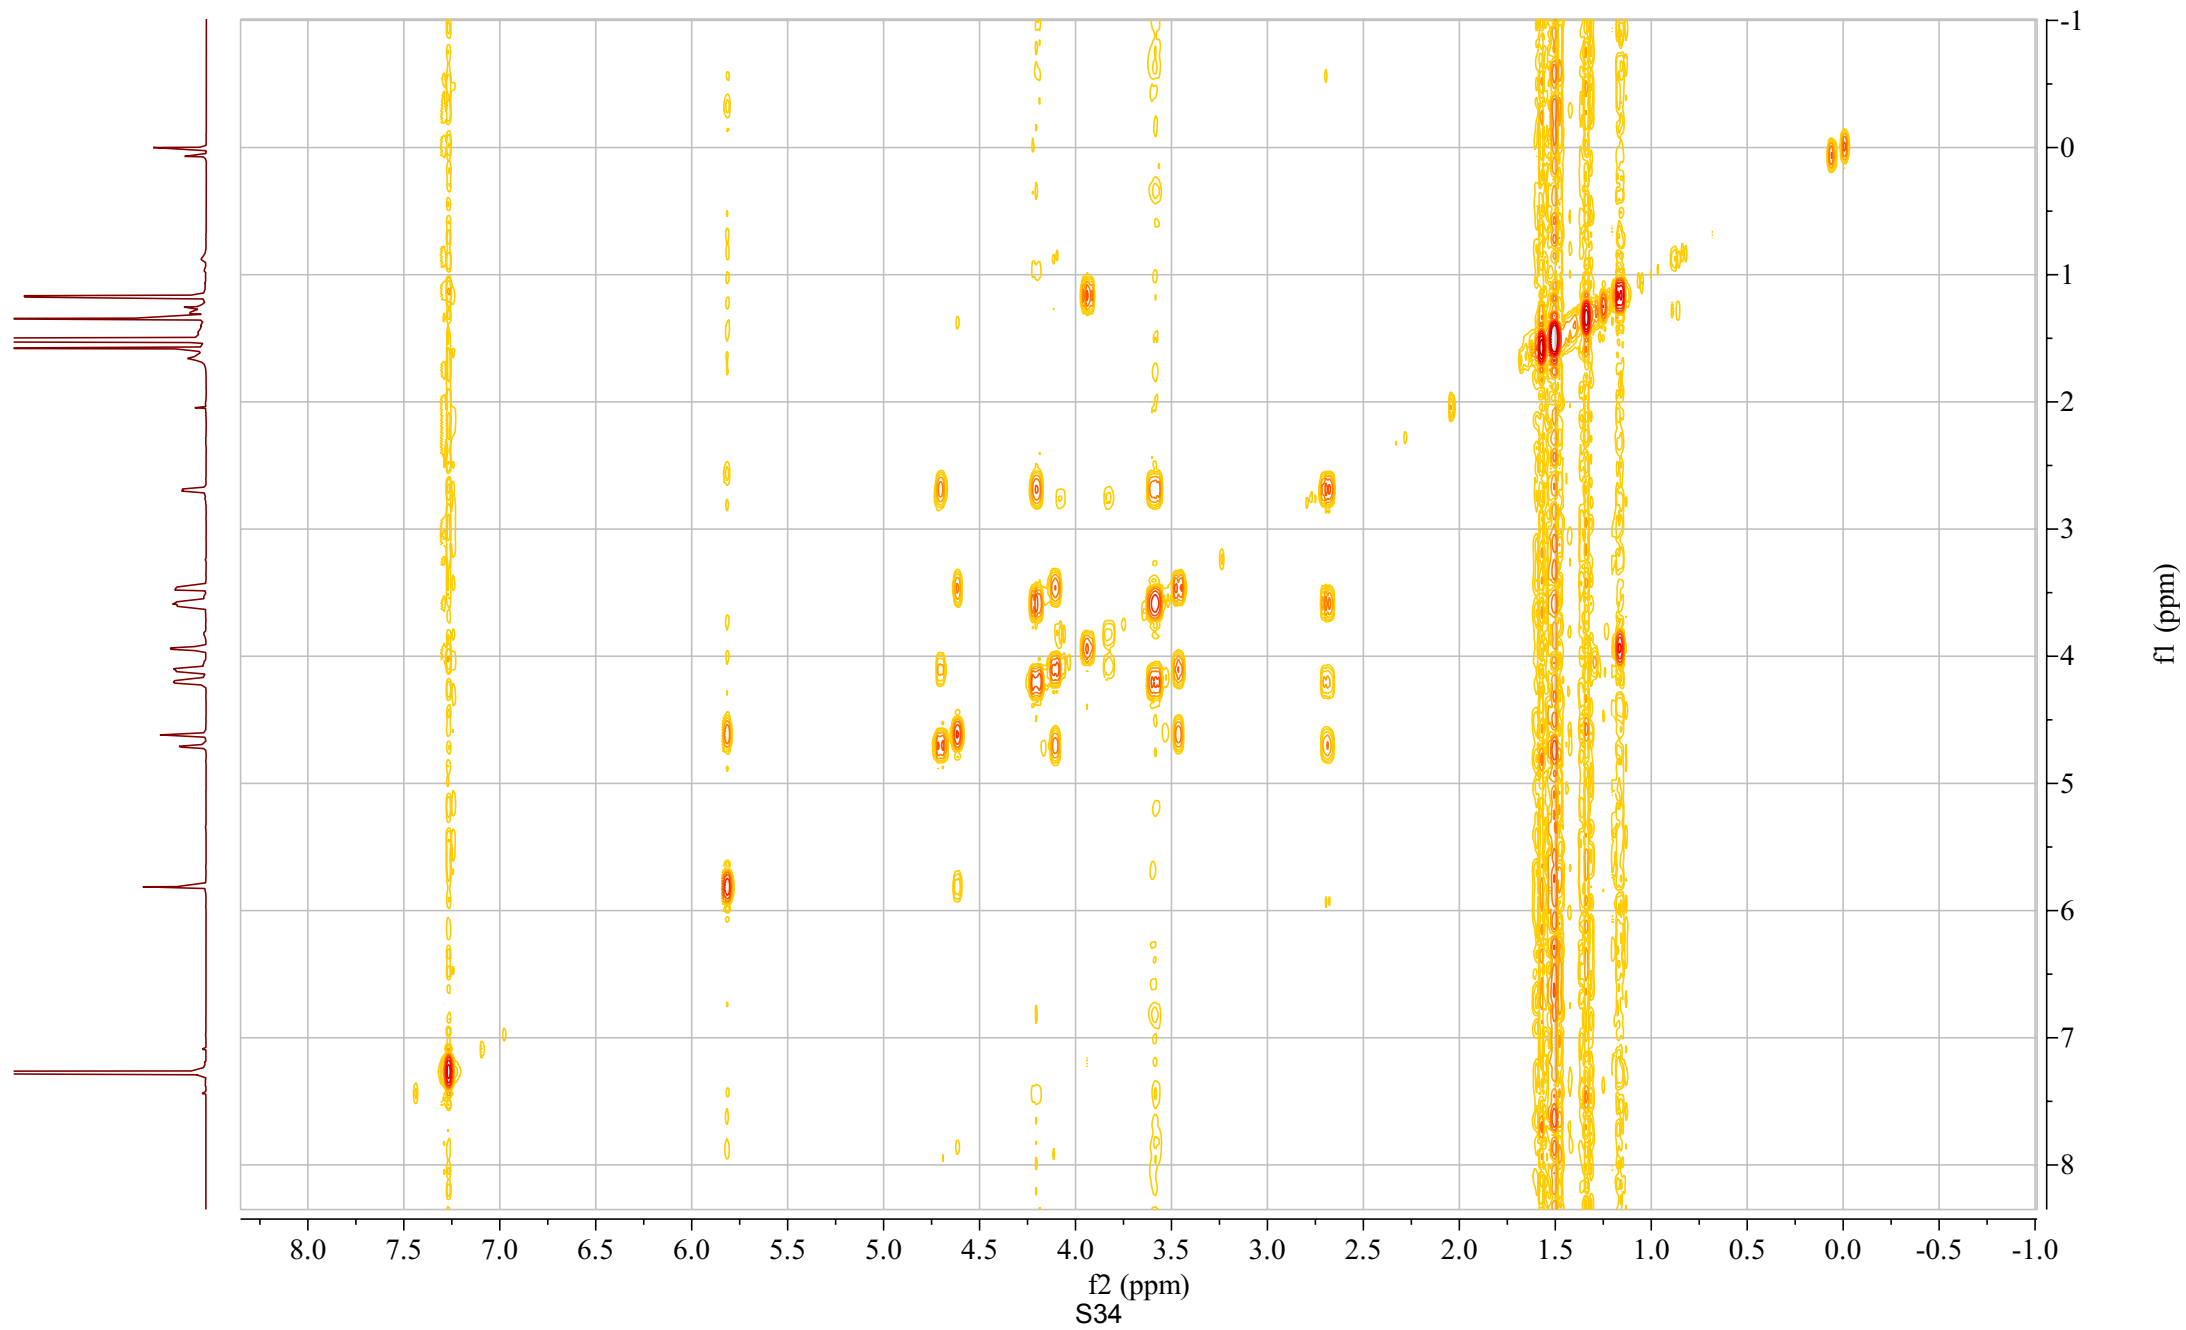

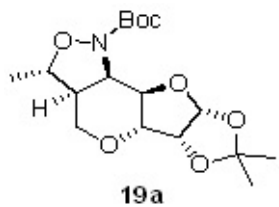

HMQC

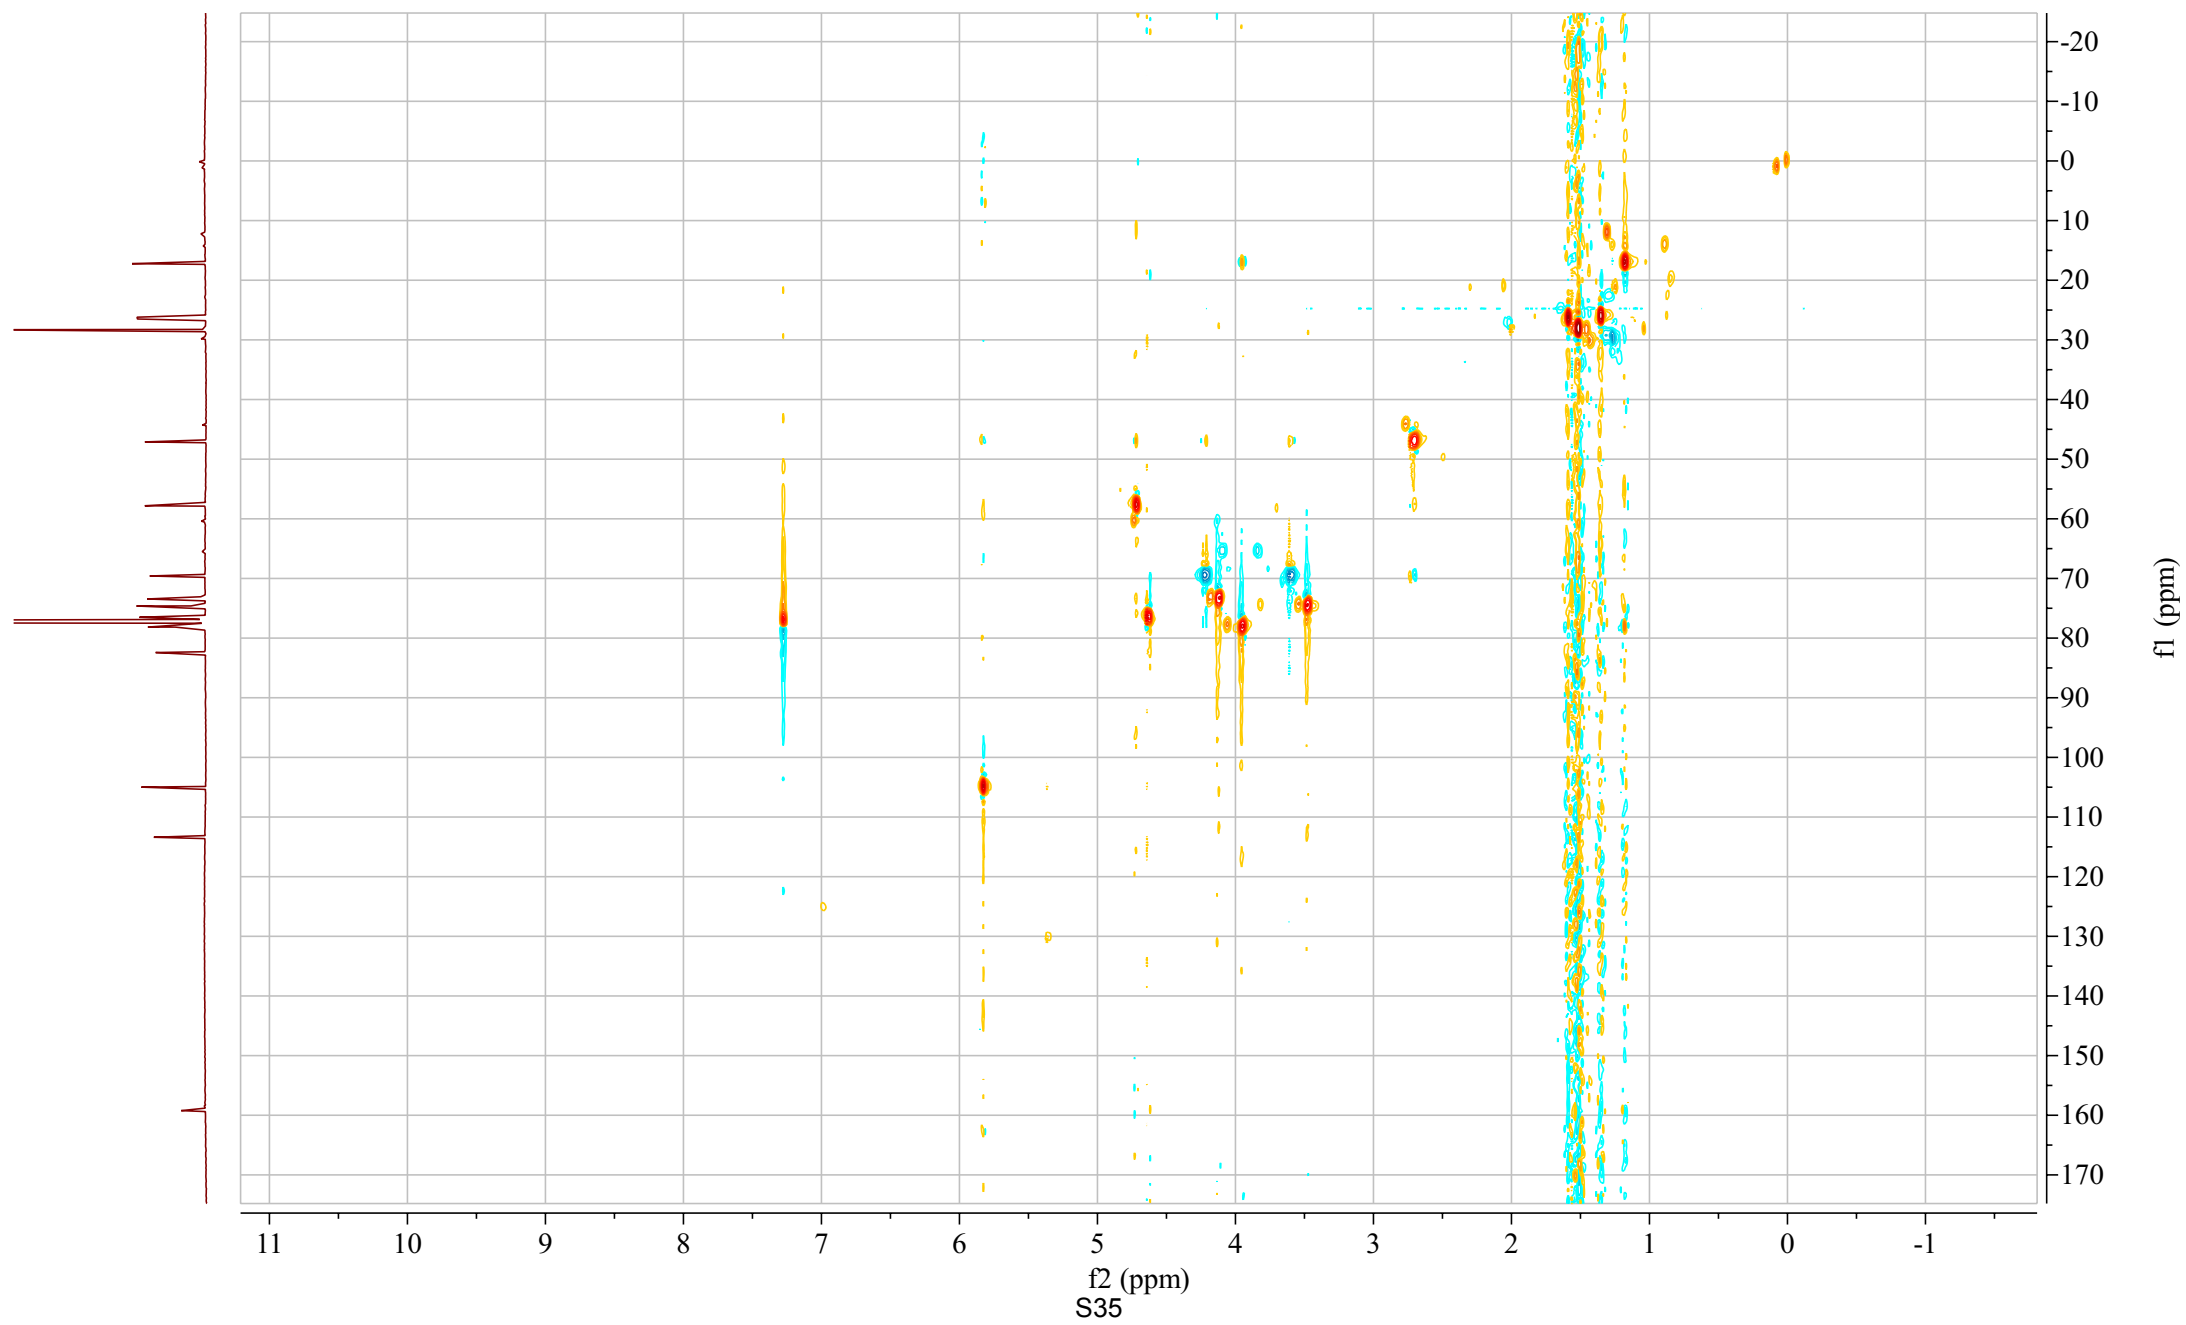

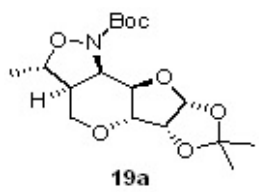

HMBC

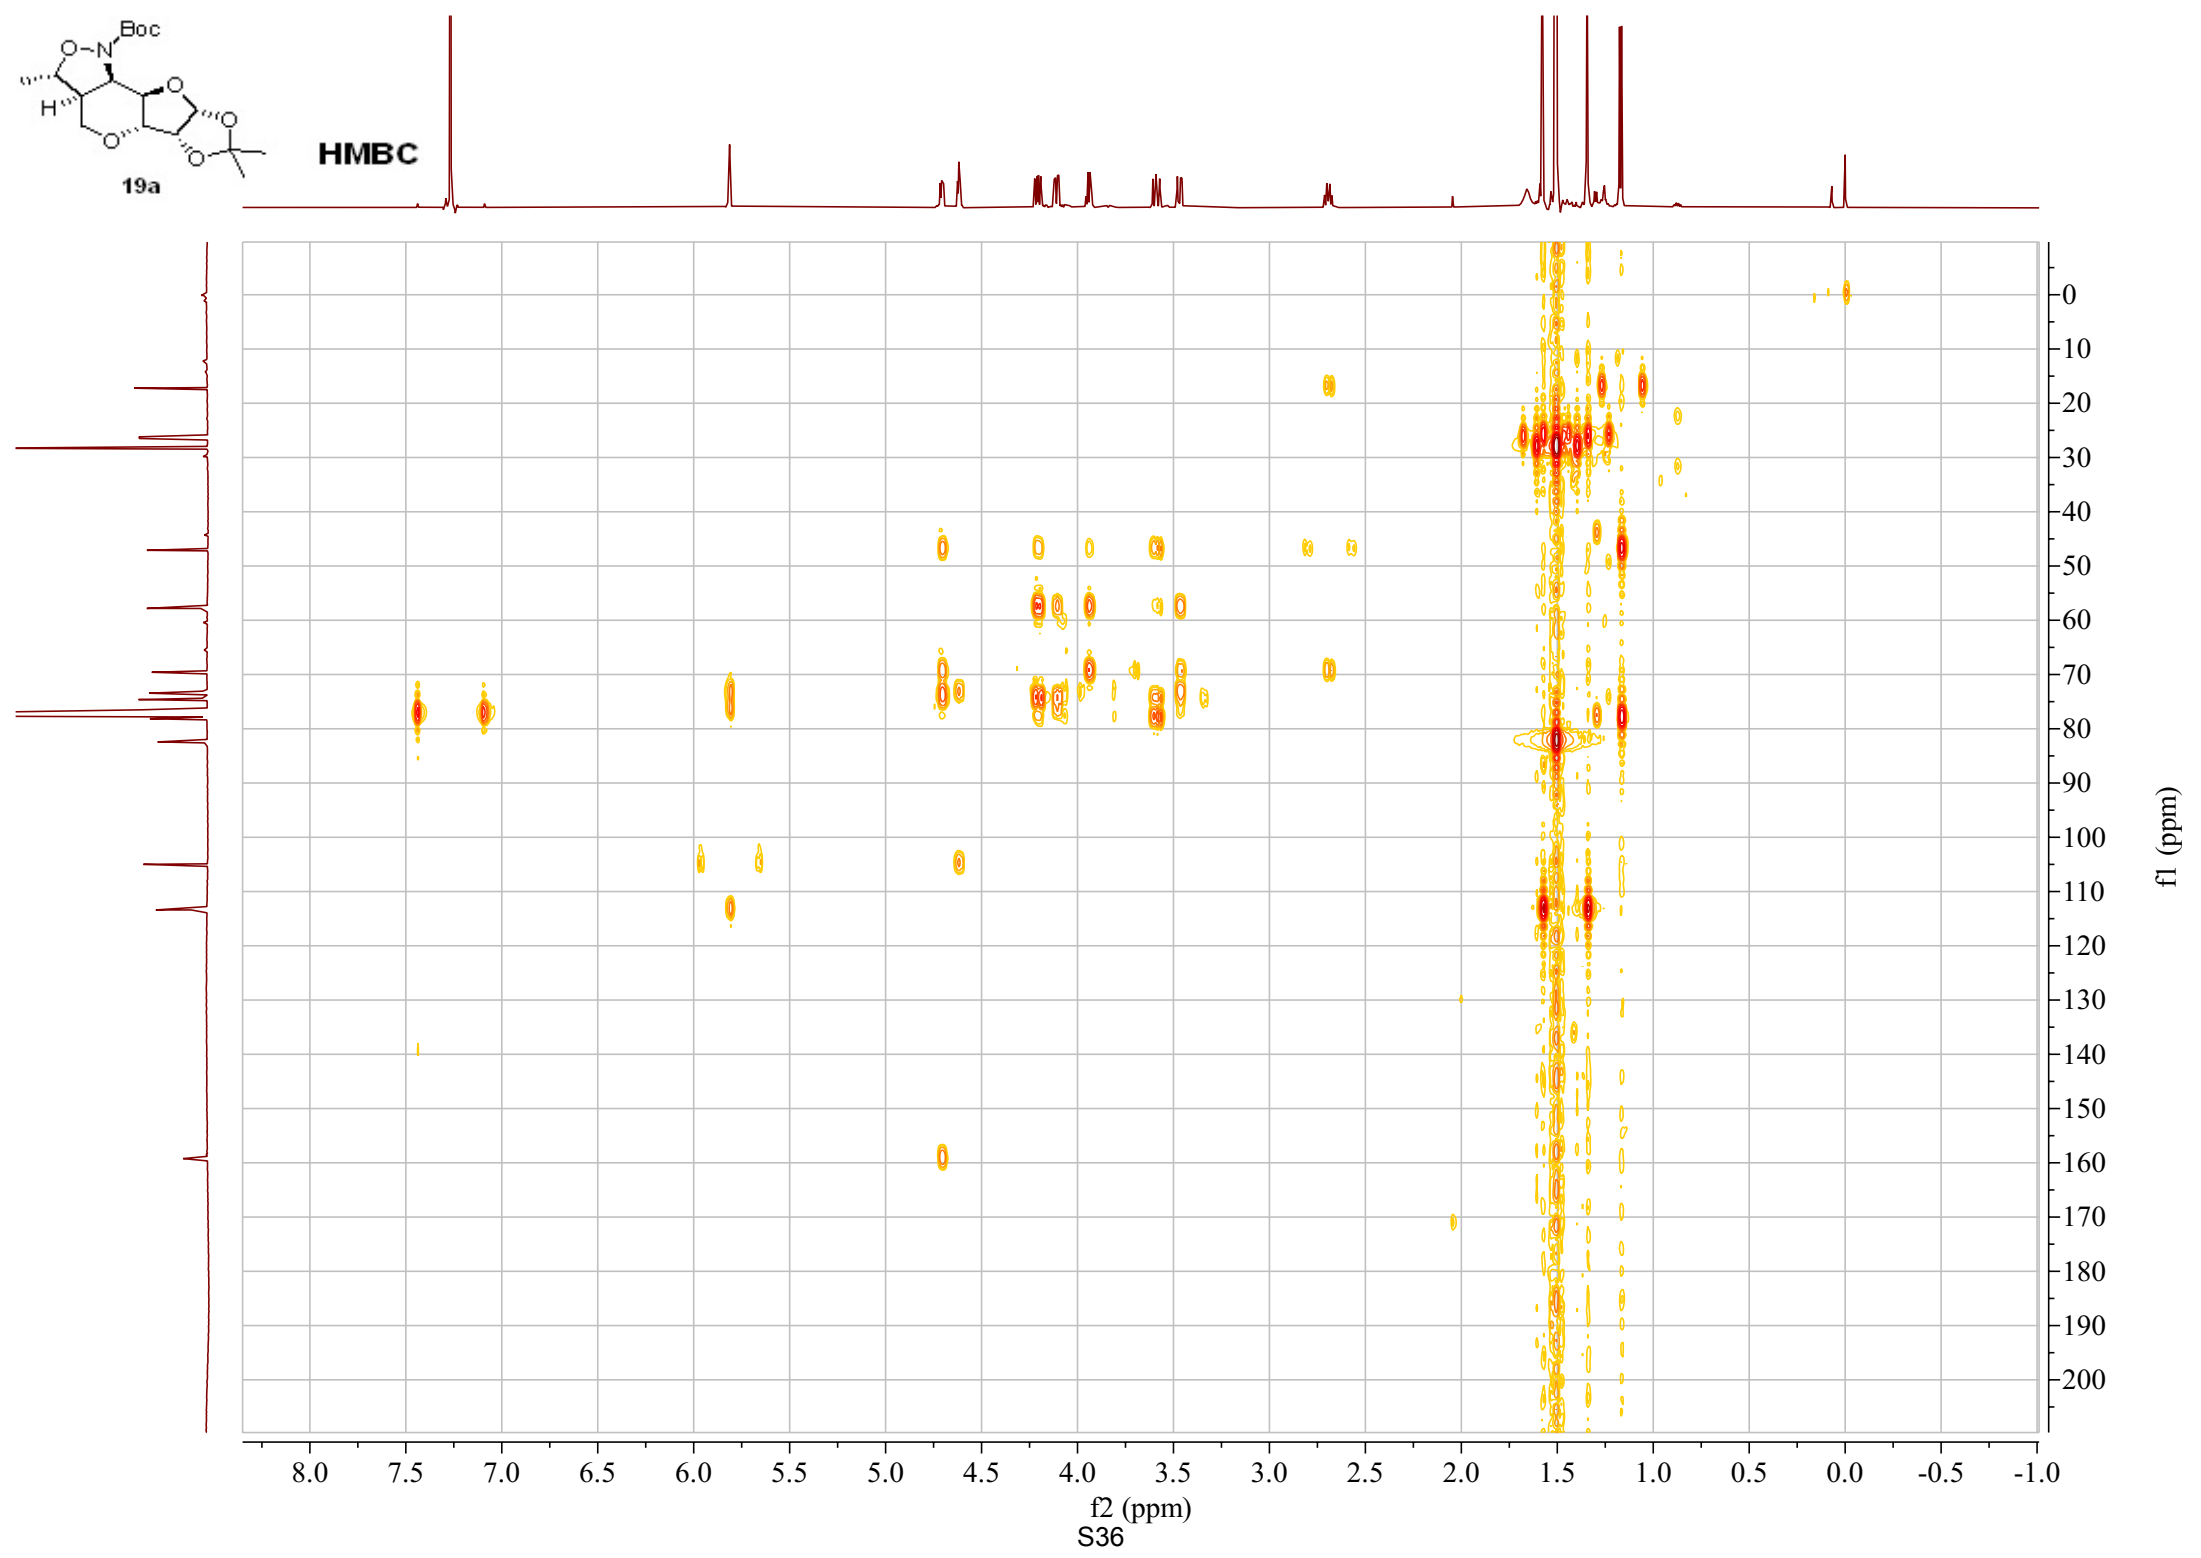

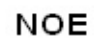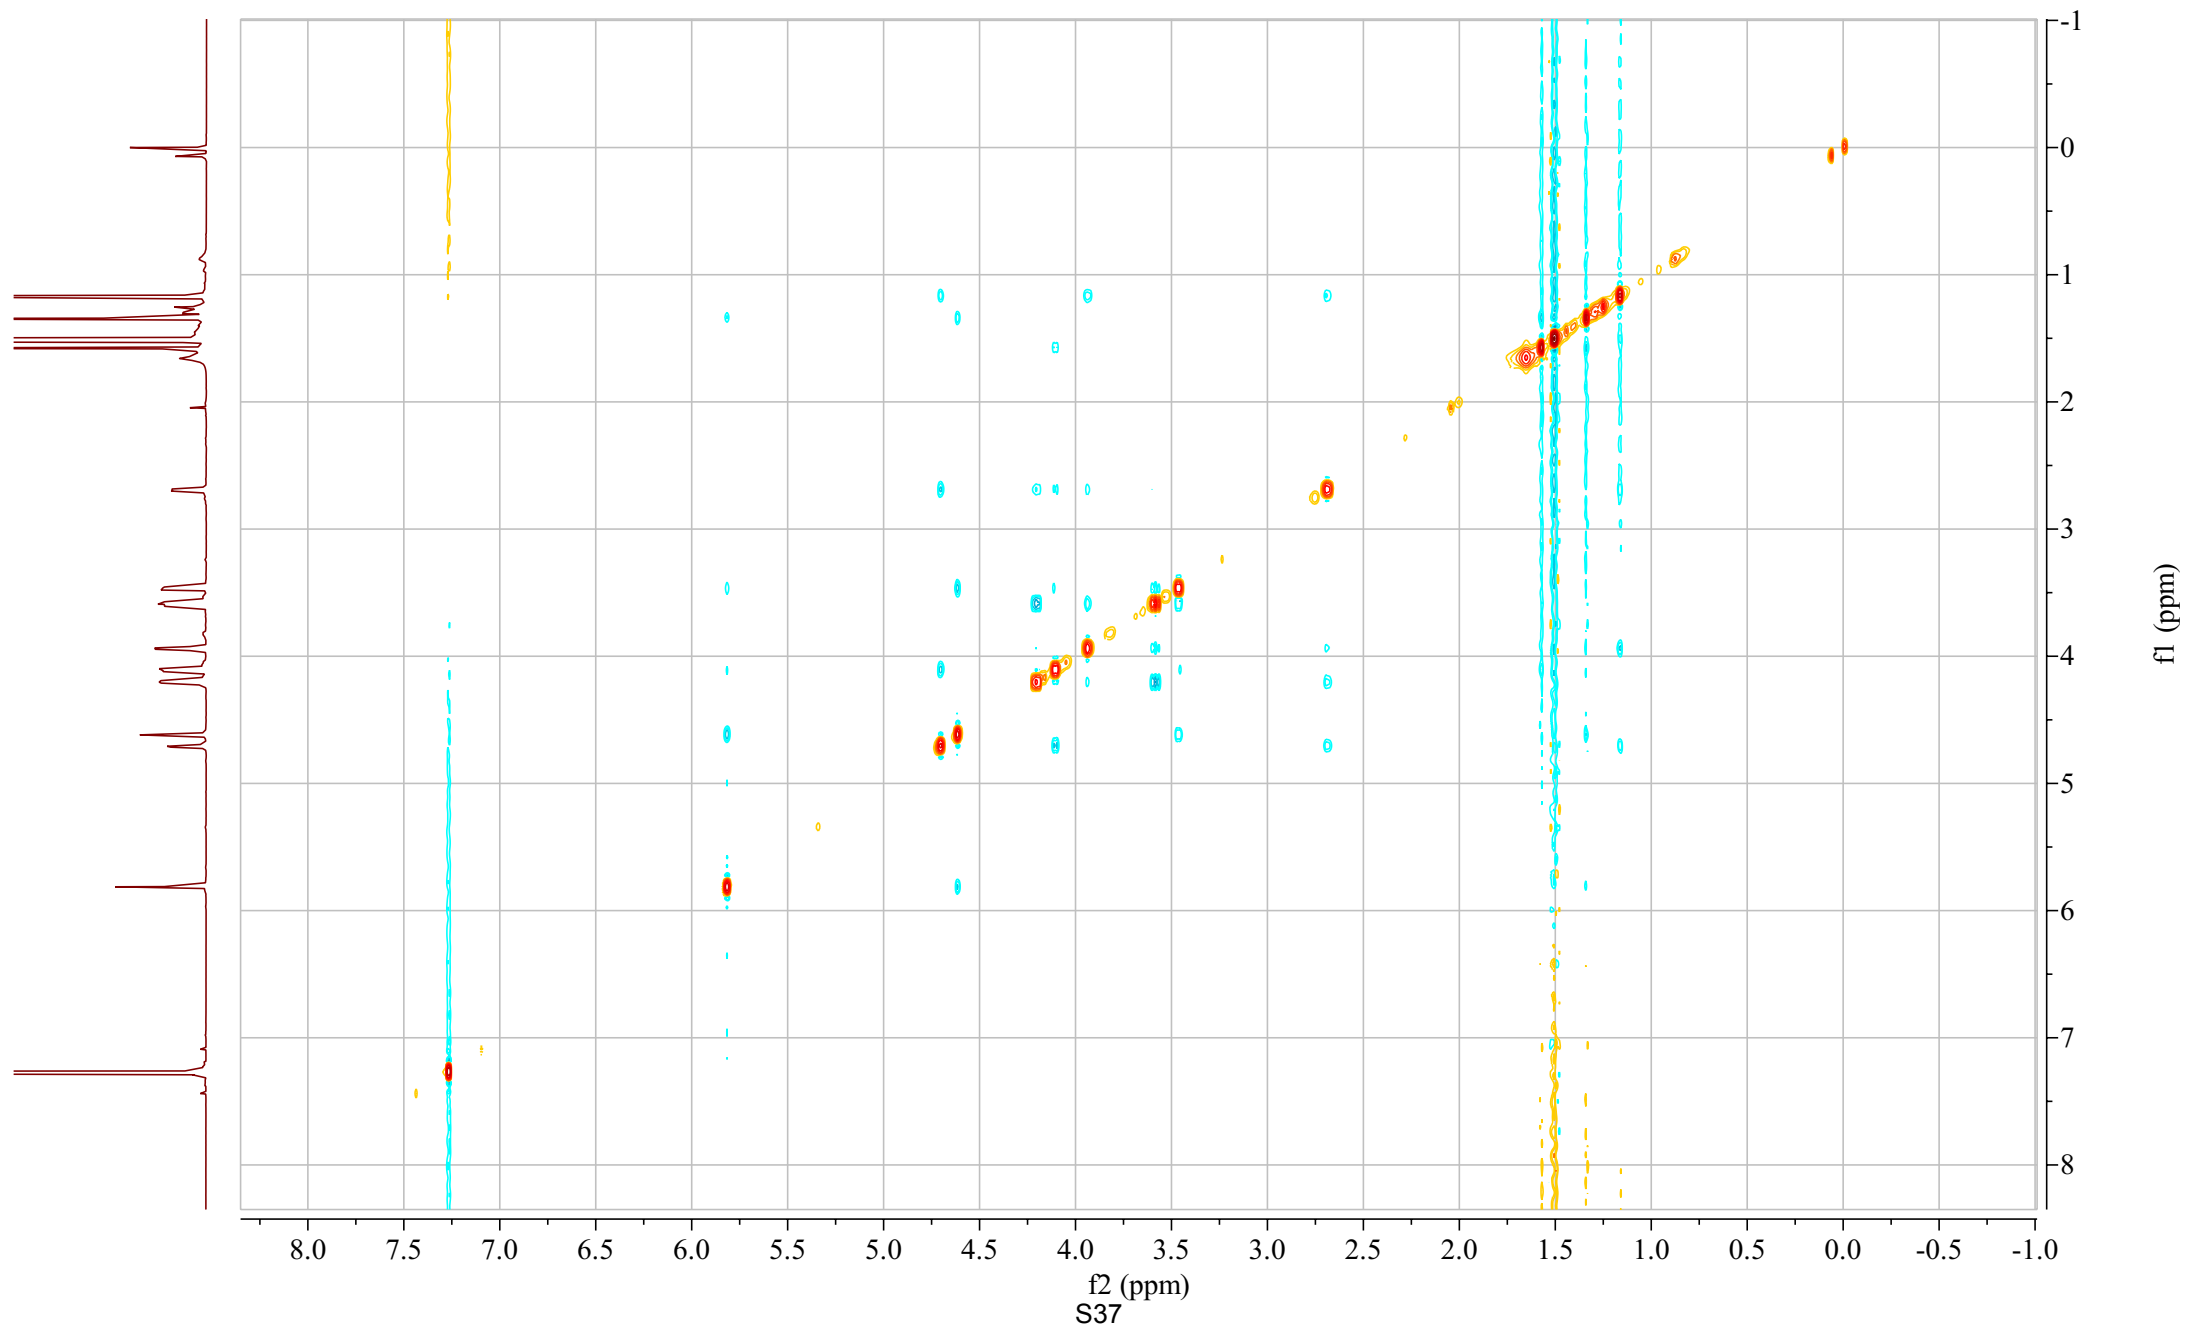

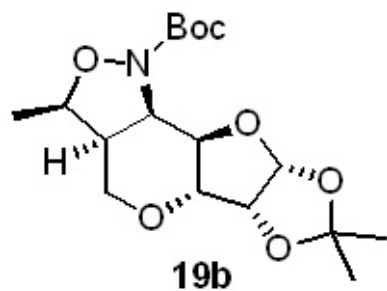

<sup>1</sup>H NMR spectrum  
(600 MHz, CDCl<sub>3</sub>)

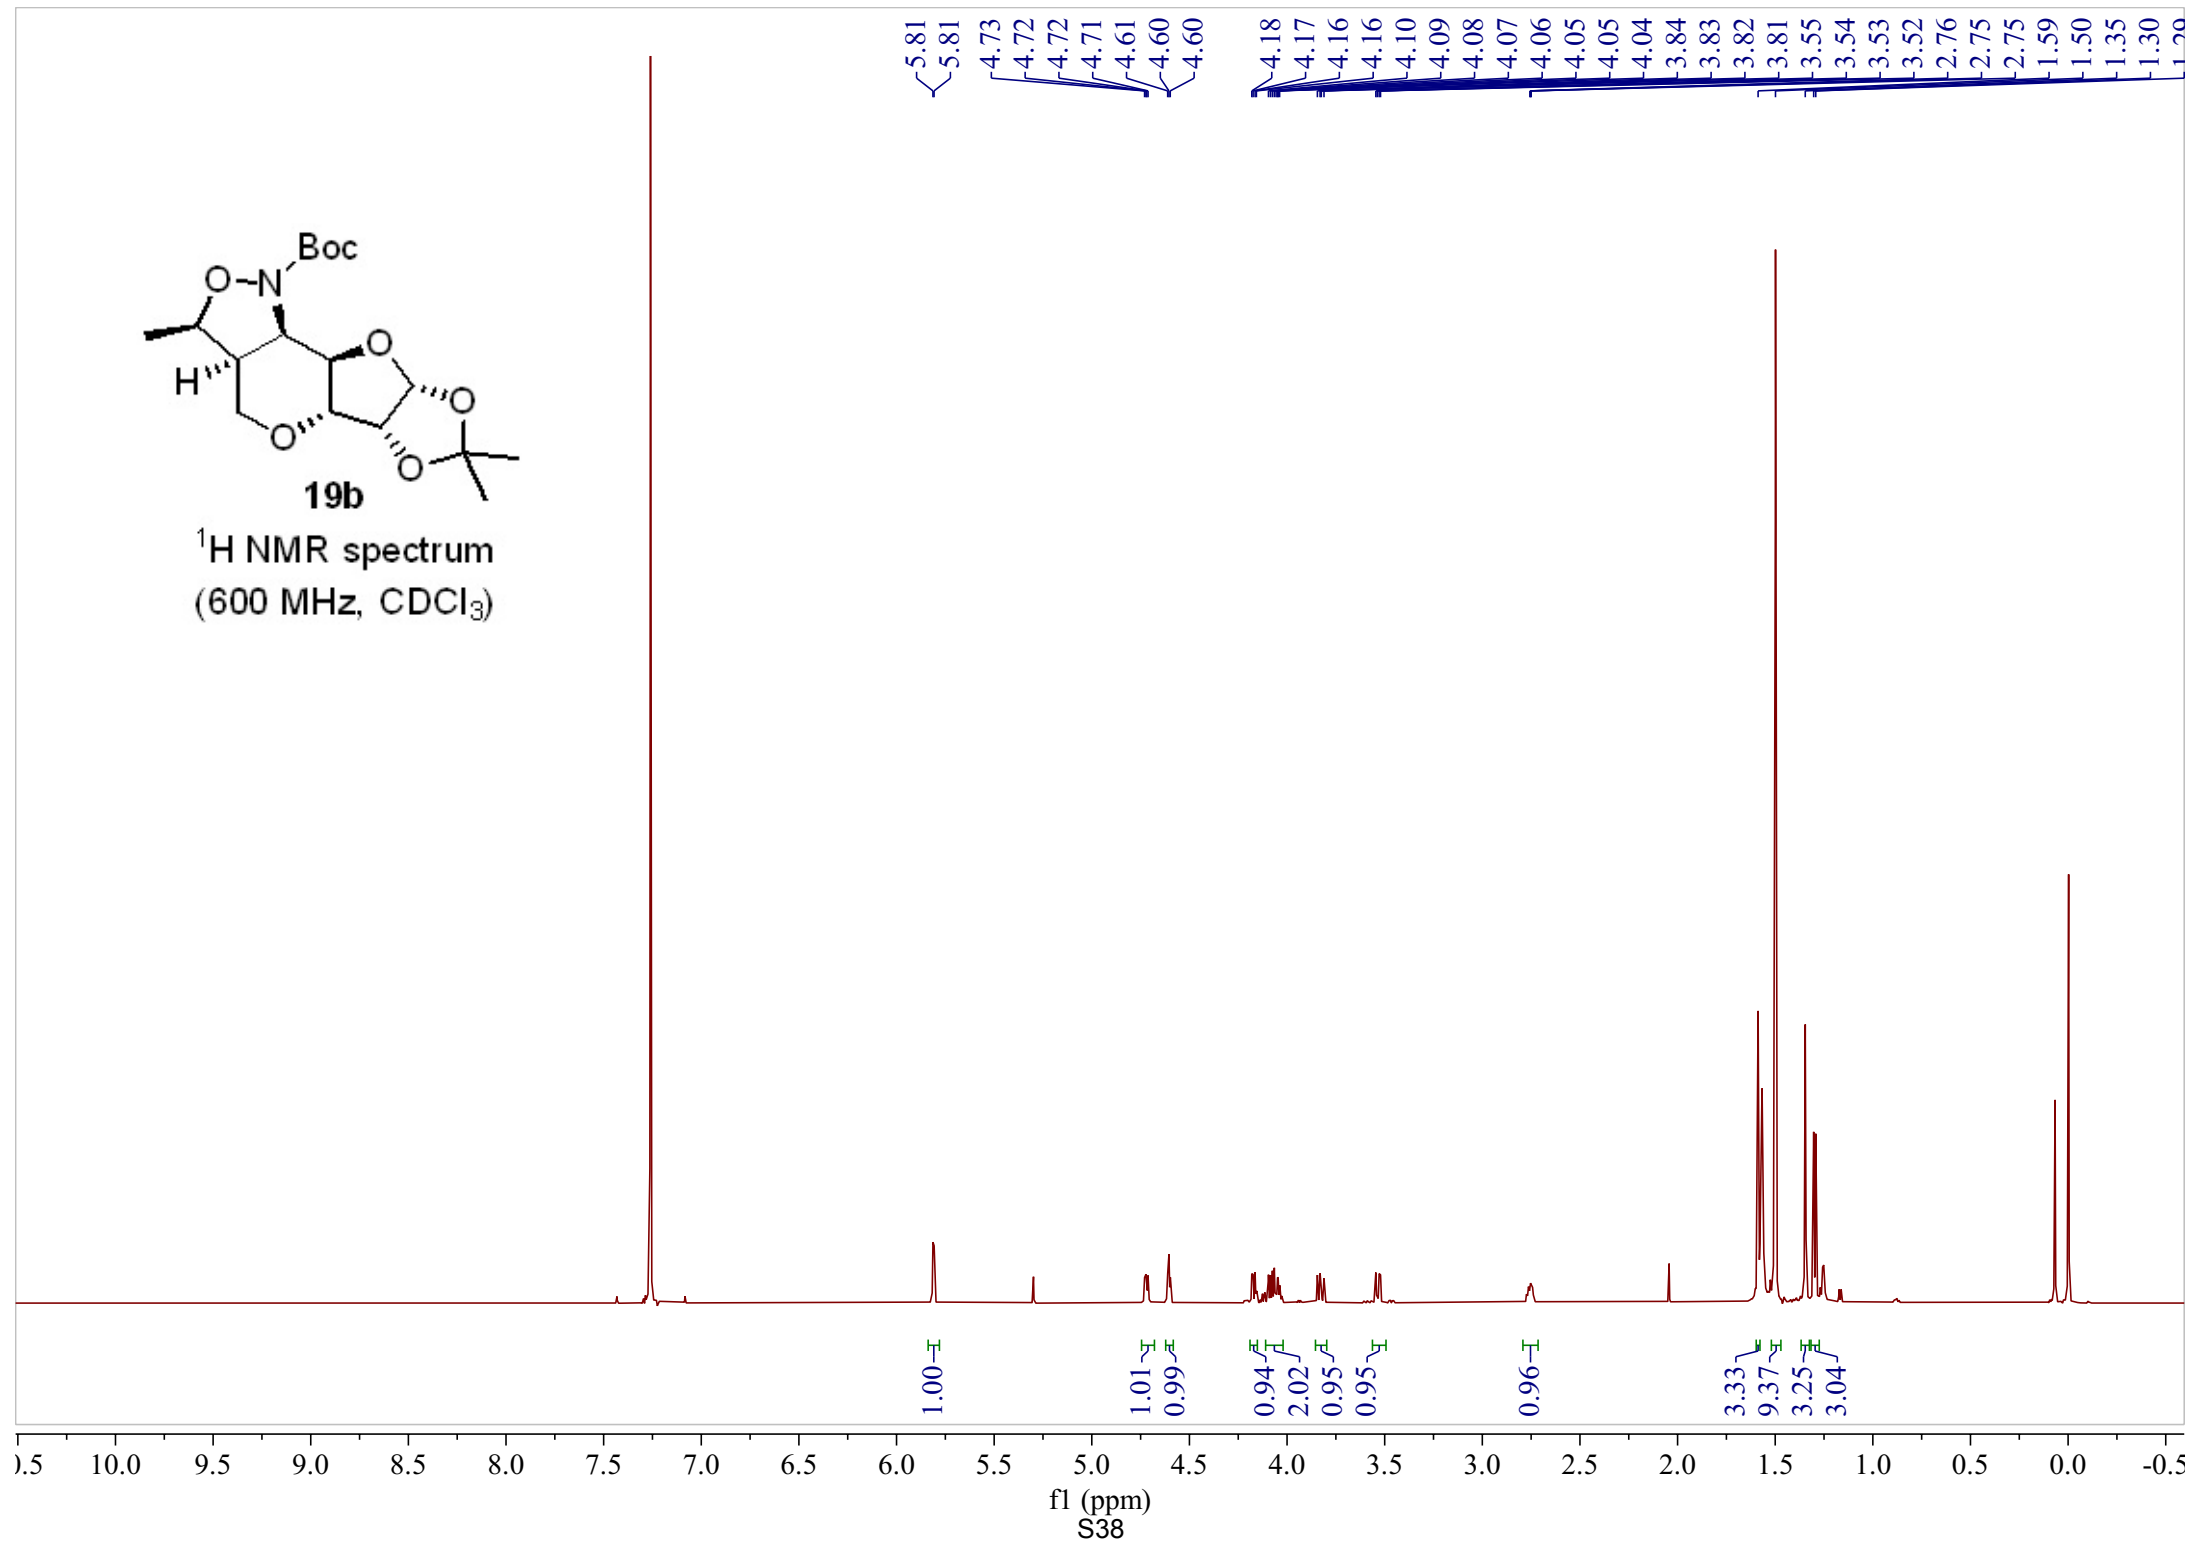

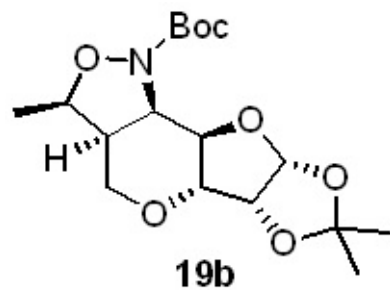

$^{13}\text{C}$  NMR spectrum  
(151 MHz,  $\text{CDCl}_3$ )

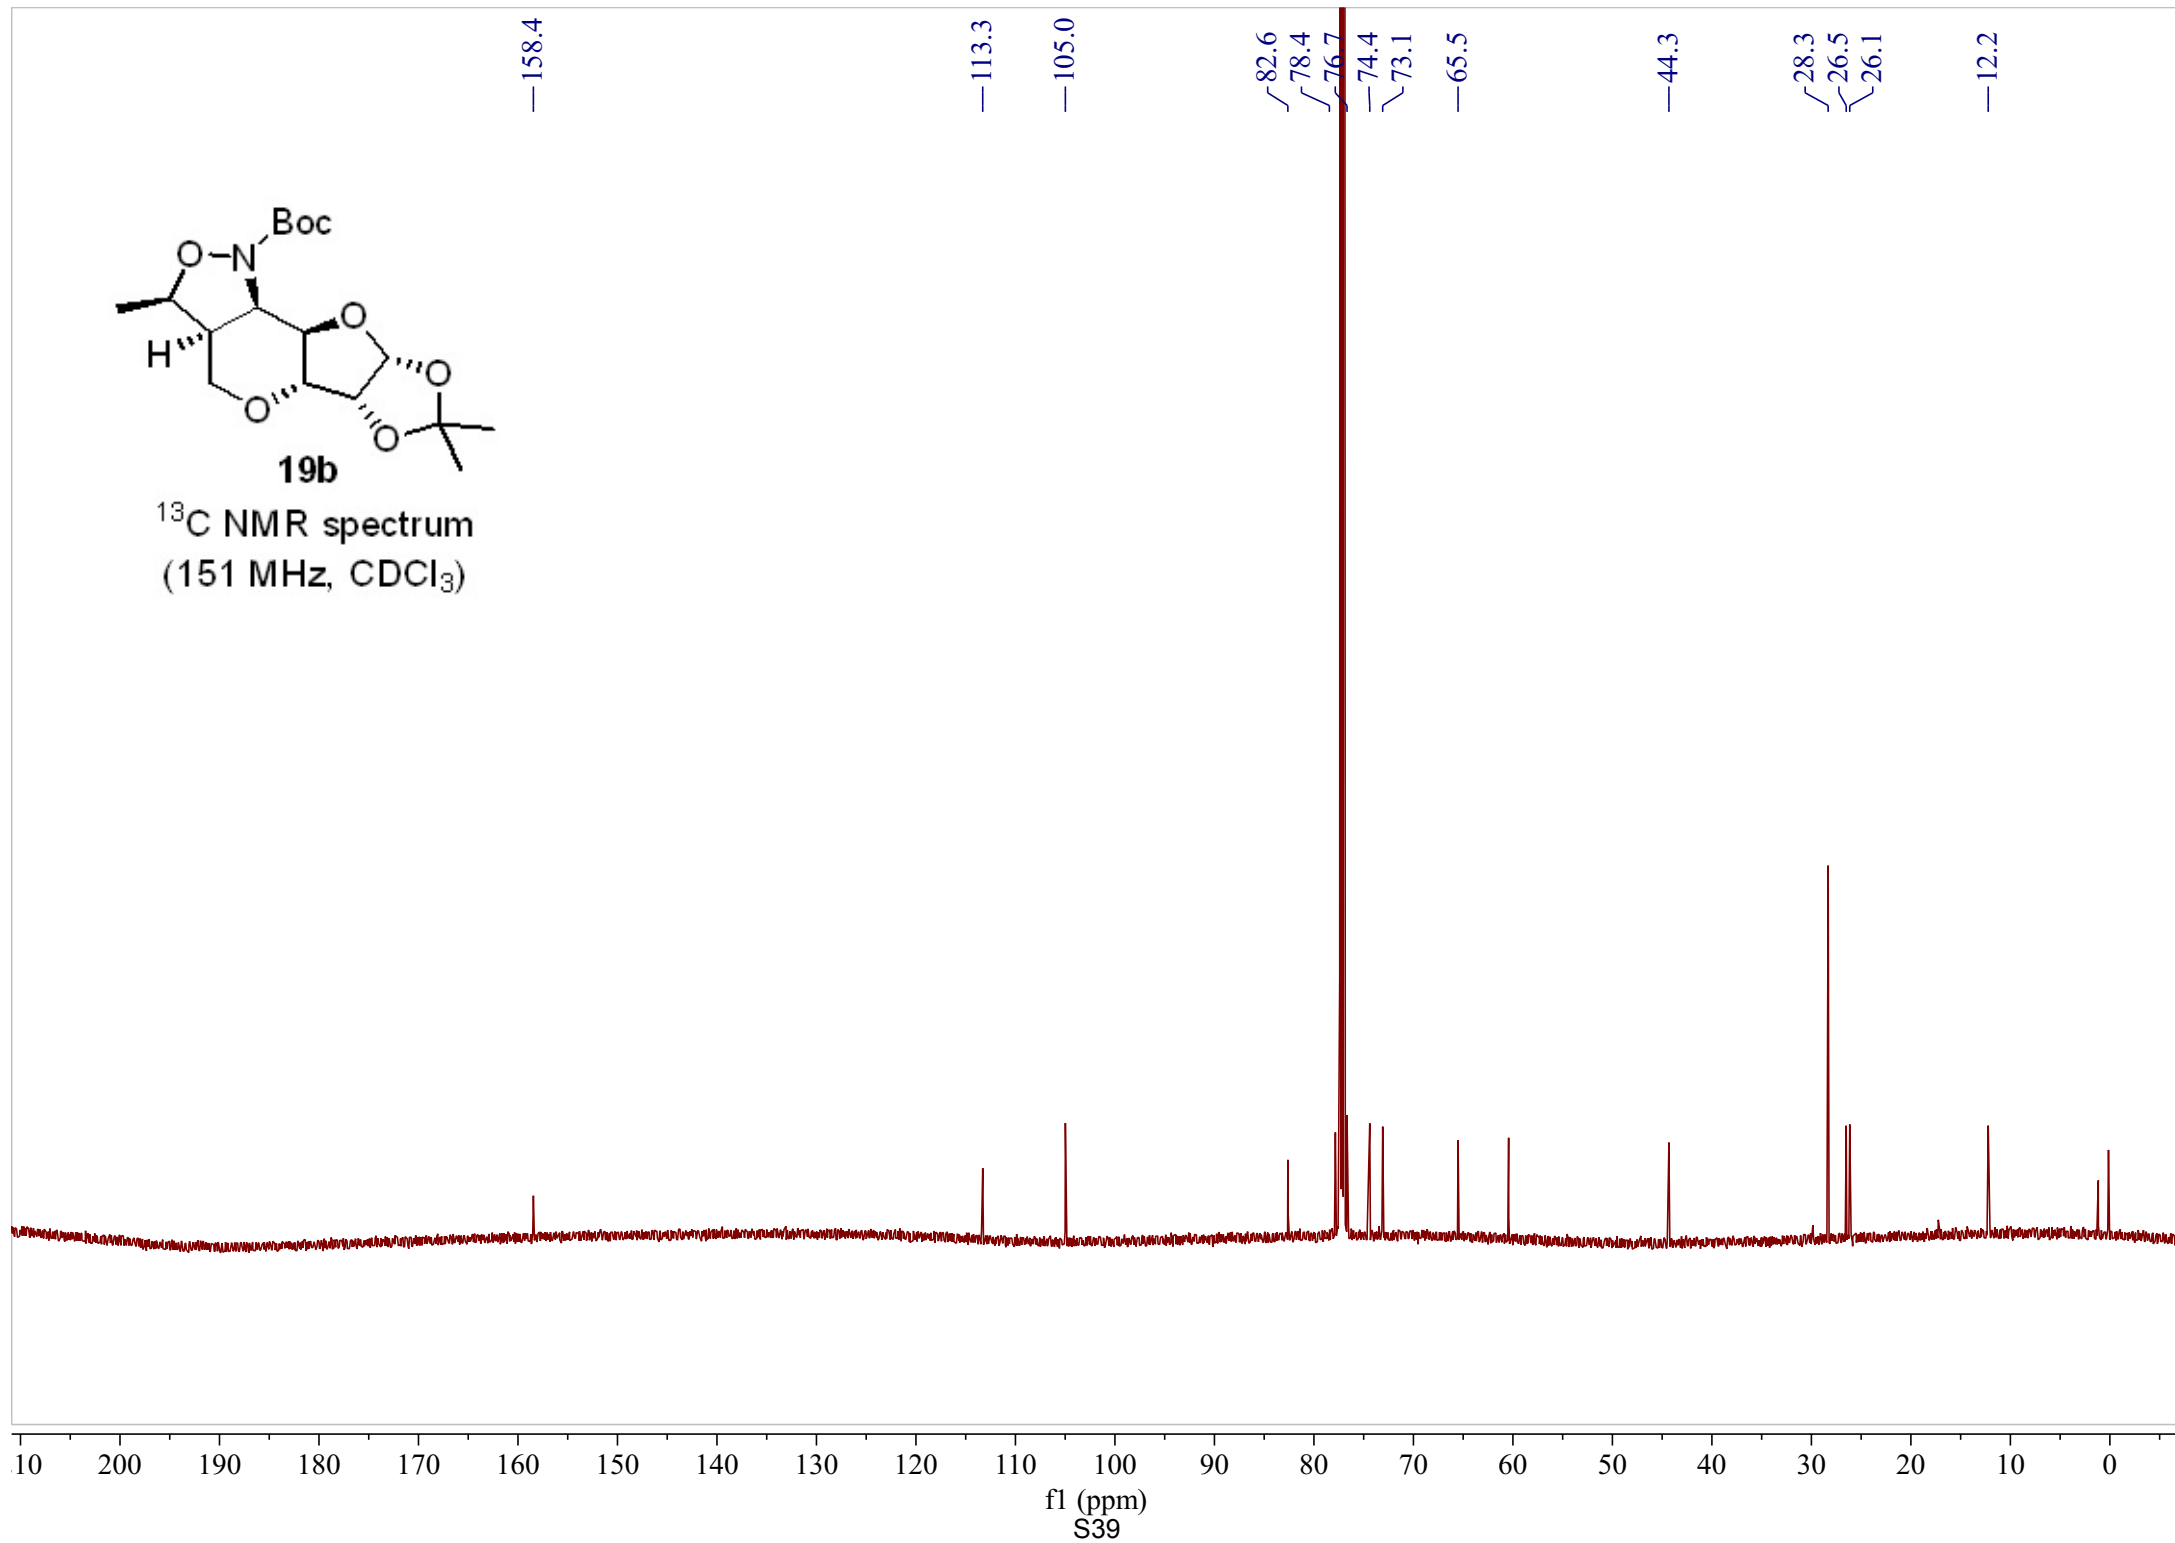

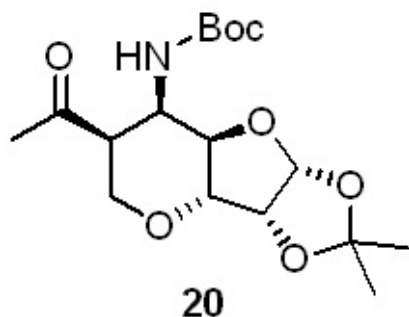

$^1\text{H}$  NMR spectrum  
(400 MHz,  $\text{CDCl}_3$ )

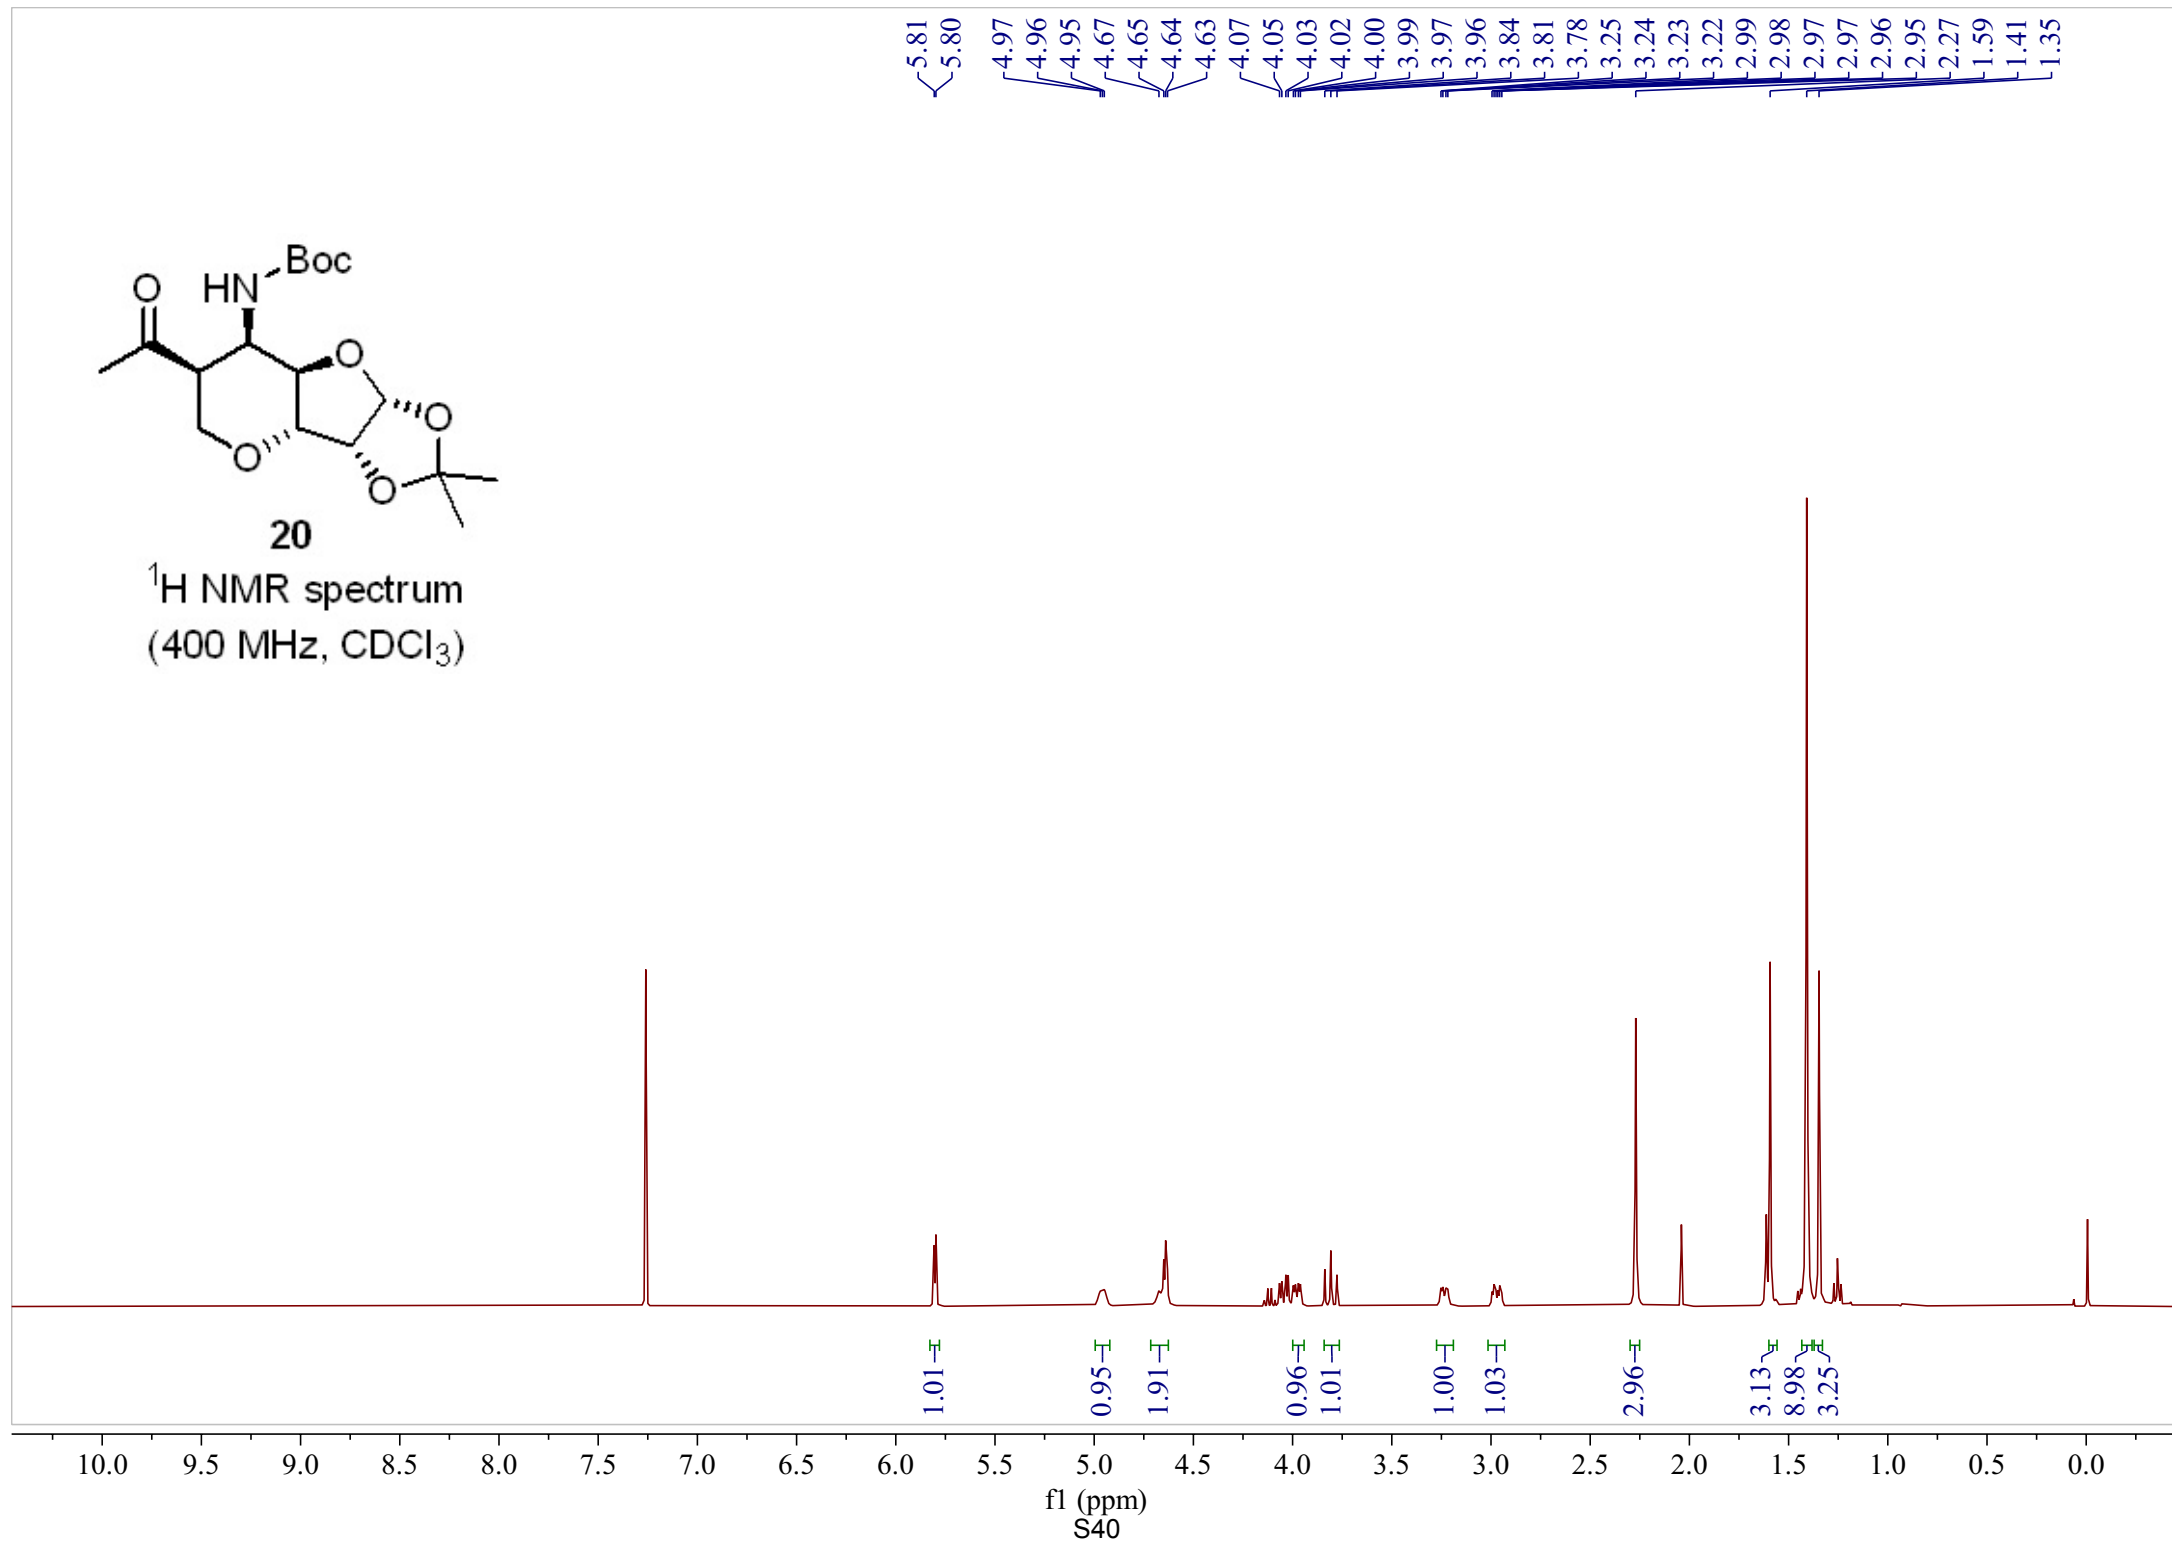

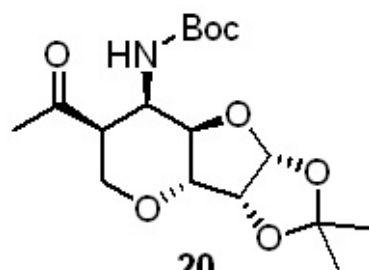

**20**  
 $^{13}\text{C}$  NMR spectrum  
 (101 MHz,  $\text{CDCl}_3$ )

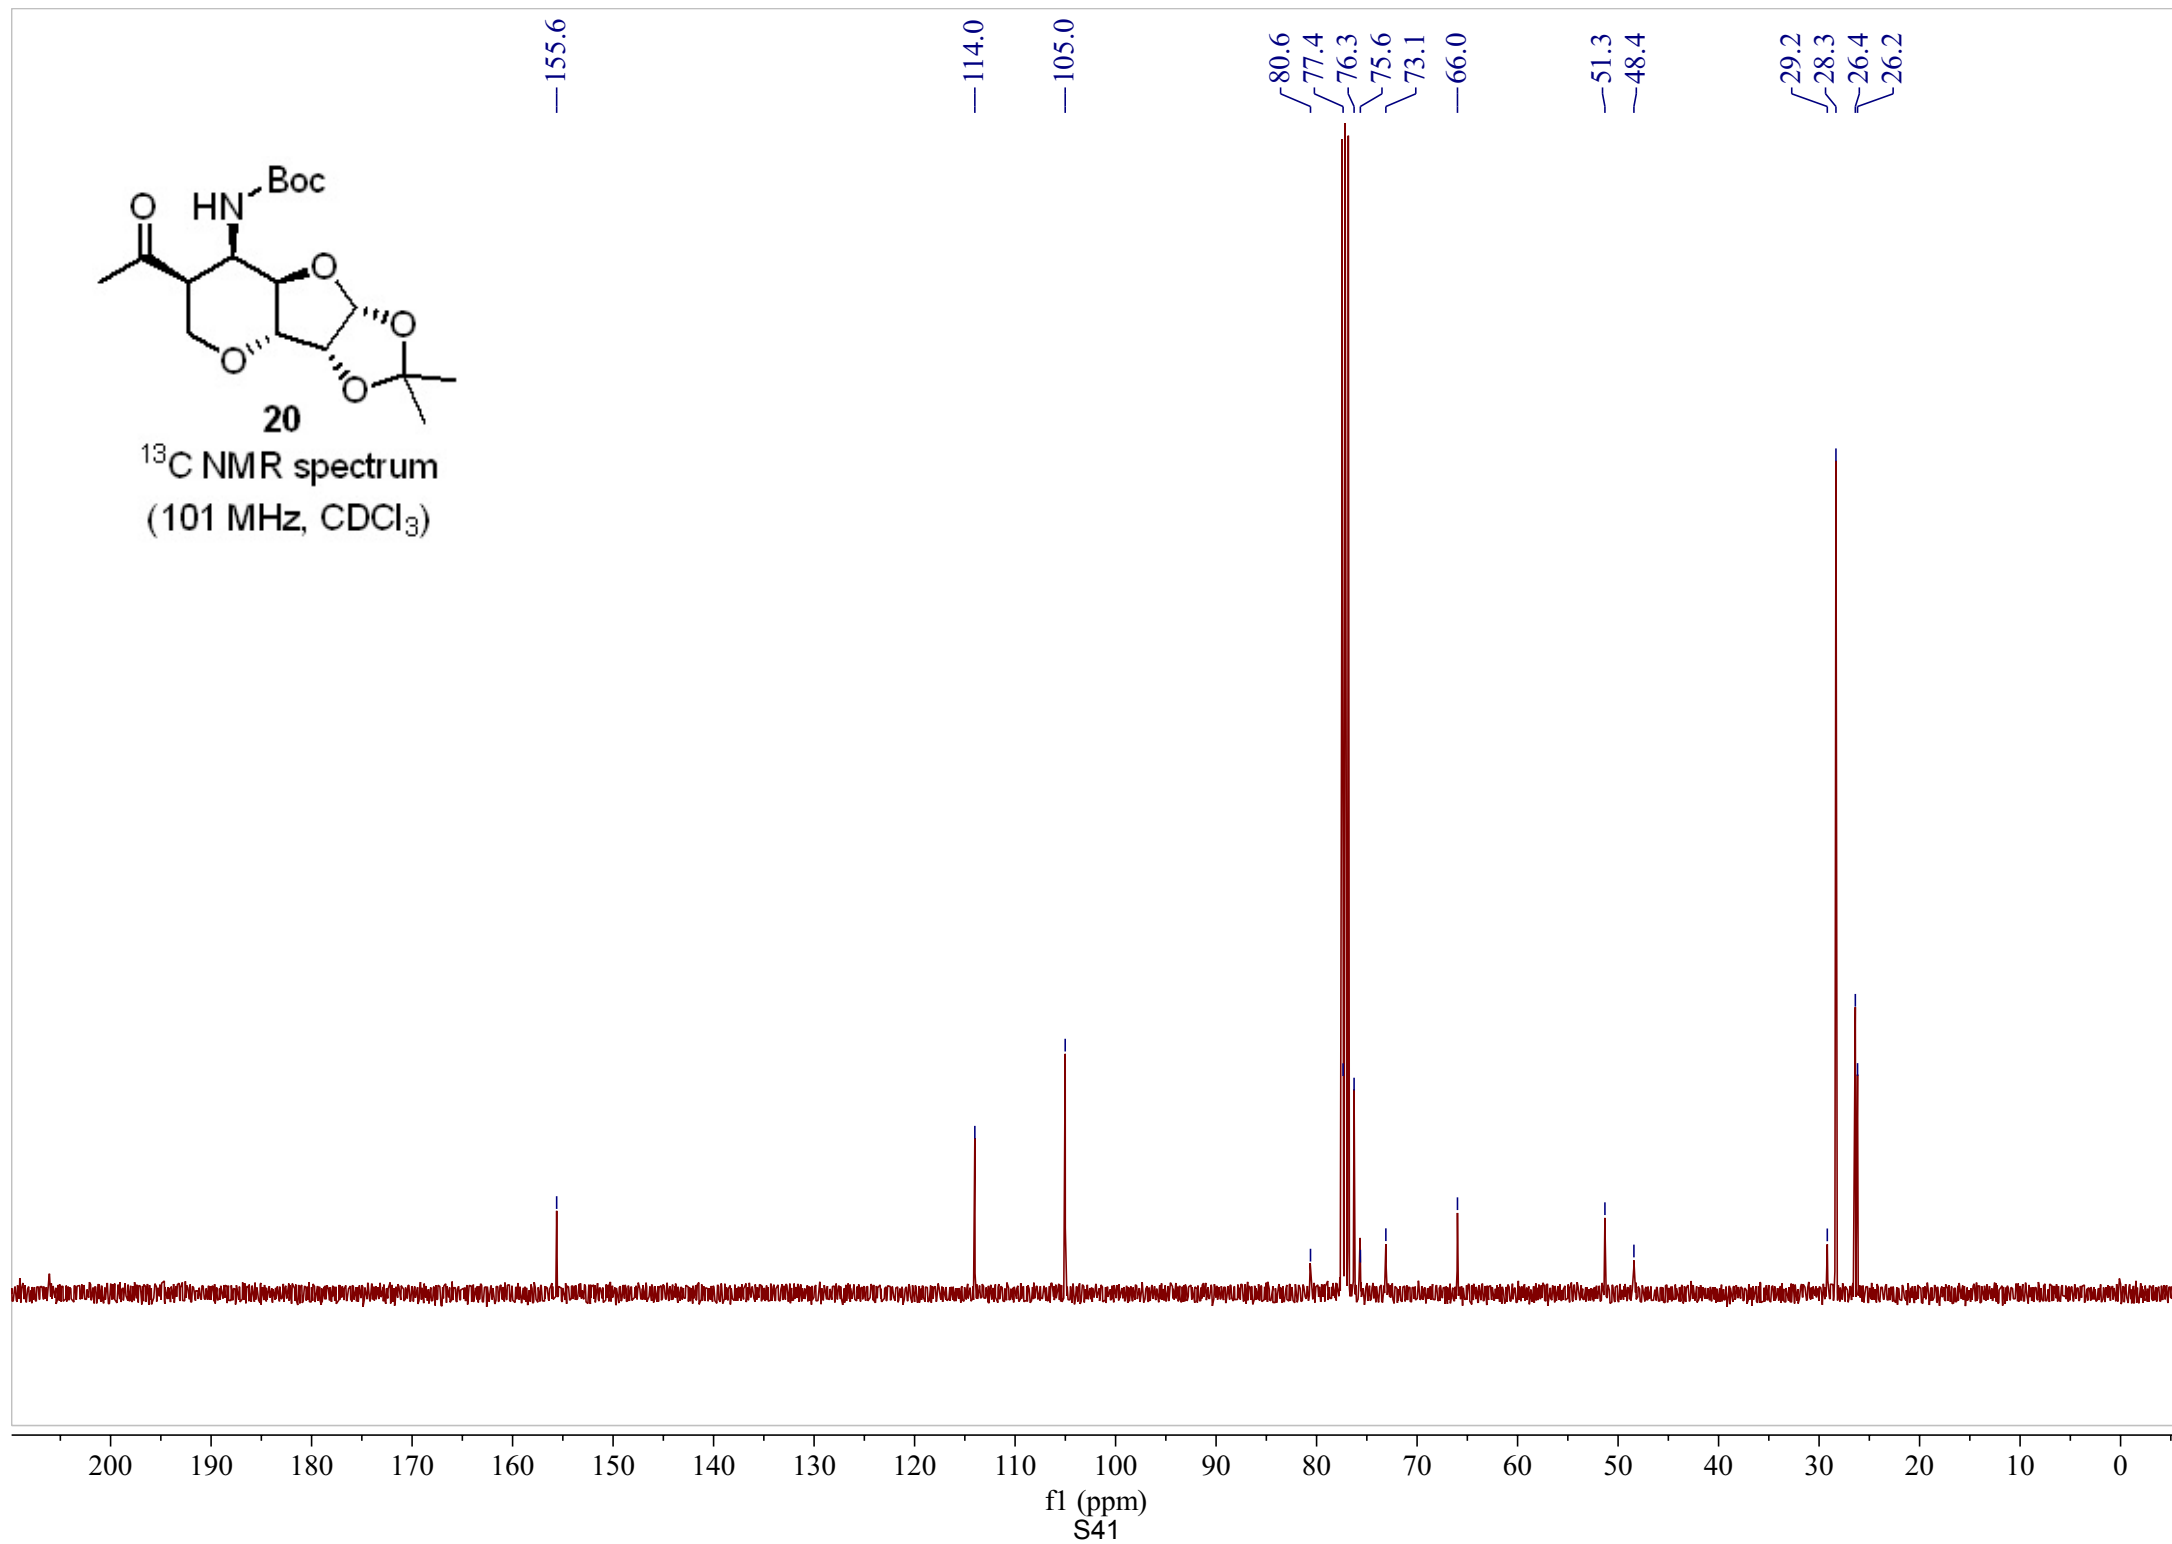

Supplement: Additional file 1 [file 1860-5397-21-196-S1.pdf]
